# Supplementary material for: Heptafluoroisopropyl diazomethane (i-C3F7CHN2): in situ generation and synthesis of pyrazoles
Source: Royal Society of Chemistry journal article supplement (doi:10.1039/c7ob01579h), 2017-01-01

**Heptafluoroisopropyl diazomethane (*i*-C<sub>3</sub>F<sub>7</sub>CHN<sub>2</sub>):**

***in situ* generation and synthesis of pyrazoles**

Pavel K. Mykhailiuk<sup>a,b</sup>

a) Taras Shevchenko National University of Kyiv; Chemistry Department; Volodymyrska 64, 01601 Kyiv (Ukraine)

E-mail: [Pavel.Mykhailiuk@gmail.com](mailto:Pavel.Mykhailiuk@gmail.com)

b) Enamine Ltd.; Chervonotkatska 78, 01103 Kyiv (Ukraine),

Homepage: [www.enamine.net](http://www.enamine.net)

**Supporting Information**

Table of contents:

|                                                                                    |   |
|------------------------------------------------------------------------------------|---|
| (A) Experimental part.....                                                         | 2 |
| (B) Data description.....                                                          | 3 |
| (C) Copies of <sup>1</sup> H, <sup>19</sup> F and <sup>13</sup> C NMR spectra..... | 9 |

## (A) Experimental part

### 1. General details

Solvents were purified according to standard procedures. Other starting materials were taken at Enamine at the highest commercial quality and used without further purification. Melting points are uncorrected. <sup>1</sup>H- and <sup>13</sup>C-NMR spectra were recorded on a Bruker Avance 500 or 400 spectrometer (at 500 MHz or 400 and 125 or 101 MHz, respectively). <sup>19</sup>F-NMR spectra were recorded on a Varian Unity Plus 400 spectrometer (at 376 Hz). Chemical shifts are reported in ppm downfield from Me<sub>4</sub>Si (<sup>1</sup>H, <sup>13</sup>C) or upfield from CFCl<sub>3</sub> (<sup>19</sup>F) using conventional deuterium lock referencing as internal standards.

### 3a. General procedure for generating *i*C<sub>3</sub>F<sub>7</sub>CHN<sub>2</sub> (**9**)

A suspension of C<sub>3</sub>F<sub>7</sub>CH<sub>2</sub>NH<sub>2</sub>\*HCl (38 mg, 0.16 mmol, 1.0 equiv) and NaNO<sub>2</sub> (18 mg, 0.26 mmol, 1.6 equiv) in CDCl<sub>3</sub> (1.0 mL)/H<sub>2</sub>O (0.1 mL) was vigorously stirred during 1 h at room temperature. The organic layer was separated, dried over Na<sub>2</sub>SO<sub>4</sub> and filtered off. NMR spectra of crude *i*C<sub>3</sub>F<sub>7</sub>CHN<sub>2</sub> (**9**) in CDCl<sub>3</sub> (ca. 80% purity) were measured.

<sup>1</sup>H NMR (400 MHz, CDCl<sub>3</sub>) δ 4.25 (s, 1H).

<sup>19</sup>F NMR (376 MHz, CDCl<sub>3</sub>) δ -77.1 (6F, d, *J* = 11.3 Hz), -158.5 (1F, heptet (7 lines), *J* = 11.3 Hz).

### 3b. General procedure for [3+2]-cycloaddition

To a stirred suspension of C<sub>3</sub>F<sub>7</sub>CH<sub>2</sub>NH<sub>2</sub>\*HCl (113 mg, 0.48 mmol, 3.0 equiv) in CH<sub>2</sub>Cl<sub>2</sub> (4.0 mL) / water (0.2 mL), sodium nitrite (54 mg, 0.78 mmol, 5.0 equiv) and alkyne (0.16 mmol, 1.0 equiv) was added. The reaction mixture was vigorously stirred 1 h at RT and then heated 72 h at 35 °C. Water (1.0 mL) and CH<sub>2</sub>Cl<sub>2</sub> (3 mL) were added. The organic layer was separated. The aqueous layer was washed with CH<sub>2</sub>Cl<sub>2</sub> (2 × 3 mL). The combined organic layers were dried over Na<sub>2</sub>SO<sub>4</sub> and evaporated under *vacuum* to provide the pure product.

### 4. General procedure for oxidation

To a stirred solution of **35a** (1.3 g, 4.2 mmol, 1 equiv) in benzene, MnO<sub>2</sub> (3.65 g, 42 mmol, 10 equiv.) was added. Then the reaction mixture was heated to reflux. After 5 h stirring, the obtained reaction mixture was cooled down to room temperature and then treated by filtering. The filtrate was evaporated under *vacuum*. The formed residue was purified by column chromatography on silica gel (Hex/MTBE = 3/1) to afford the desired product **13a** (0.55 g, 1.8 mmol, 43% yield) as a white solid, m.p. 46-47 °C.



## (B) Data description

### Methyl 3-(perfluoropropan-2-yl)-1H-pyrazole-5-carboxylate (10a)

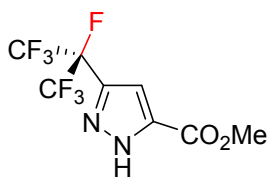

Yield: 94%; white solid, m.p. 46-47 °C.

$^1\text{H}$  NMR (400 MHz,  $\text{CDCl}_3$ )  $\delta$  11.92 (br s, 1H), 7.12 (s, 1H), 3.97 (s, 3H).  $^{19}\text{F}$  NMR (376 MHz,  $\text{CDCl}_3$ )  $\delta$  -76.7 (d,  $J = 8.9$  Hz), -181.3 (p,  $J = 8.8$  Hz).  $^{13}\text{C}$  NMR (101 MHz,  $\text{CDCl}_3$ )  $\delta$  159.2 (s), 140.9 (d,  $J = 26.4$  Hz), 135.6 (s), 120.2 (dm), 109.2 (s), 90.4-85.7 (m), 52.9 (s). Anal. calcd. for  $\text{C}_8\text{H}_5\text{F}_7\text{N}_2\text{O}_2$ : C, 32.67; H, 1.71; N, 9.52. Found: C, 32.51; H, 1.91; N, 9.72.

### Ethyl 3-(perfluoropropan-2-yl)-1H-pyrazole-5-carboxylate (13a)

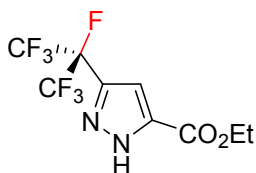

Yield: 91%; white solid, m.p. 46-47 °C.

$^1\text{H}$  NMR (500 MHz,  $\text{CDCl}_3$ )  $\delta$  7.11 (s, 1H), 4.44 (q,  $J = 7.1$  Hz, 2H), 1.41 (t,  $J = 7.1$  Hz, 3H).  $^{19}\text{F}$  NMR (376 MHz,  $\text{CDCl}_3$ )  $\delta$  -76.7 (d,  $J = 9.0$  Hz), -181.2 (p,  $J = 8.7$  Hz).  $^{13}\text{C}$  NMR (101 MHz,  $\text{CDCl}_3$ )  $\delta$  158.8 (s), 140.9 (d,  $J = 26.0$  Hz), 135.9 (s), 125.0-115.4 (dm), 109.0 (s), 91.1-87.6 (m), 62.4 (s), 14.3 (s). Anal. calcd. for  $\text{C}_9\text{H}_7\text{F}_7\text{N}_2\text{O}_2$ : C, 35.08; H, 2.29; N, 9.09. Found: C, 35.37; H, 2.01; N, 8.75.

### Isopropyl 3-(perfluoropropan-2-yl)-1H-pyrazole-5-carboxylate (14a)

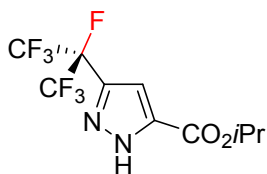

Yield: 95%; yellow oil.

$^1\text{H}$  NMR (500 MHz,  $\text{CDCl}_3$ )  $\delta$  7.09 (s, 1H), 5.30 (m, 1H), 1.39 (d,  $J = 6.3$  Hz, 6H).  $^{19}\text{F}$  NMR (376 MHz,  $\text{CDCl}_3$ )  $\delta$  -76.7 (d,  $J = 8.9$  Hz), -181.3 (p,  $J = 8.8$  Hz).  $^{13}\text{C}$  NMR (126 MHz,  $\text{CDCl}_3$ )  $\delta$  158.5 (s), 140.7 (d,  $J = 25.9$  Hz), 136.3 (s), 124.5 – 114.9 (dm), 109.0 (d,  $J = 4.0$  Hz), 92.5-85.2 (m), 70.7 (s), 21.8 (s). Anal. calcd. for  $\text{C}_{10}\text{H}_9\text{F}_7\text{N}_2\text{O}_2$ : C, 37.28; H, 2.82; N, 8.70. Found: C, 37.42; H, 2.64; N, 8.97.

### ***N,N*-dimethyl-3-(perfluoropropan-2-yl)-1*H*-pyrazole-5-carboxamide (15a)**

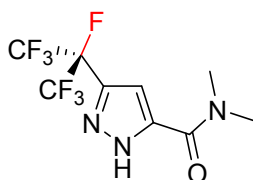

Yield: 87%; white solid, m.p. 120-122 °C.

$^1\text{H}$  NMR (500 MHz,  $\text{CDCl}_3$ )  $\delta$  6.85 (s, 1H), 3.28 (s, 3H), 3.04 (s, 3H).  $^{19}\text{F}$  NMR (376 MHz,  $\text{CDCl}_3$ )  $\delta$  -76.7 (d,  $J = 9.0$  Hz), -181.2 (p,  $J = 8.7$  Hz).  $^{13}\text{C}$  NMR (101 MHz,  $\text{CDCl}_3$ )  $\delta$  160.1 (s), 139.8 (d,  $J = 26.0$  Hz), 137.1 (s), 121.7 – 118.6 (dm), 90.3 – 87.9 (m), 106.6 (d,  $J = 2.0$  Hz), 38.8 (s), 36.6 (s). Anal. calcd. for  $\text{C}_9\text{H}_8\text{F}_7\text{N}_3\text{O}$ : C, 35.19; H, 2.63; N, 13.68. Found: C, 35.45; H, 2.33; N, 13.84.

### **1-(3-(Perfluoropropan-2-yl)-1*H*-pyrazol-5-yl)ethan-1-one (16a)**

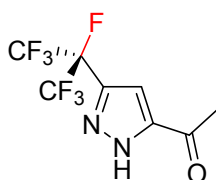

Yield: 94%; yellow oil.

$^1\text{H}$  NMR (500 MHz,  $\text{CDCl}_3$ )  $\delta$  7.07 (s, 1H), 2.60 (s, 3H).  $^{19}\text{F}$  NMR (376 MHz,  $\text{CDCl}_3$ )  $\delta$  -76.7 (d,  $J = 8.9$  Hz), -181.0 (app,  $J = 8.8$  Hz).  $^{13}\text{C}$  NMR (126 MHz,  $\text{CDCl}_3$ )  $\delta$  188.5 (s), 142.4 (s), 140.9 (d,  $J = 26.3$  Hz), 124.3-116.2 (dm), 108.8 (s), 90.3 – 87.9 (m), 27.2 (s). Anal. calcd. for  $\text{C}_8\text{H}_5\text{F}_7\text{N}_2\text{O}$ : C, 34.55; H, 1.81; N, 10.07. Found: C, 34.27; H, 1.62; N, 10.31.

### **1-(3-(Perfluoropropan-2-yl)-1*H*-pyrazol-5-yl)propan-1-one (17a)**

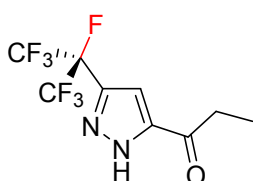

Yield: 89%; white solid, m.p. 65-66 °C.

$^1\text{H}$  NMR (500 MHz,  $\text{CDCl}_3$ )  $\delta$  10.91 (br s, 1H), 7.06 (s, 1H), 2.95 (q,  $J = 7.3$  Hz, 2H), 1.25 (t,  $J = 7.3$  Hz, 3H).  $^{19}\text{F}$  NMR (376 MHz,  $\text{CDCl}_3$ )  $\delta$  -76.7 (d,  $J = 8.4$  Hz), -181.0 (p,  $J = 8.3$  Hz).  $^{13}\text{C}$  NMR (126 MHz,  $\text{CDCl}_3$ )  $\delta$  191.8 (s), 142.0 (s), 140.8 (d,  $J = 26.2$  Hz), 123.9-116.0 (dm), 108.1 (s), 90.7 – 87.9 (m), 33.1 (s), 7.7 (s). Anal. calcd. for  $\text{C}_9\text{H}_7\text{F}_7\text{N}_2\text{O}$ : C, 37.00; H, 2.42; N, 9.59. Found: C, 37.21; H, 2.68; N, 9.14.

### 2,2-Dimethyl-1-(3-(perfluoropropan-2-yl)-1H-pyrazol-5-yl)propan-1-one (18a)

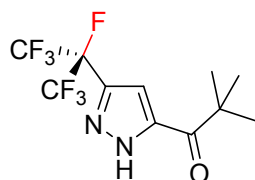

Yield: 81%; white solid, m.p. 67-68 °C.

$^1\text{H}$  NMR (500 MHz,  $\text{CDCl}_3$ )  $\delta$  7.04 (s, 1H), 1.38 (s, 9H).  $^{19}\text{F}$  NMR (376 MHz,  $\text{CDCl}_3$ )  $\delta$  -76.6 (d,  $J$  = 8.8 Hz), -180.8 (app,  $J$  = 8.7 Hz).  $^{13}\text{C}$  NMR (126 MHz,  $\text{CDCl}_3$ )  $\delta$  196.6 (s), 141.0 (d,  $J$  = 26.5 Hz), 139.2 (s), 124.2–116.0 (dm), 108.1 (s), 90.5 – 88.1 (m), 43.8 (s), 27.4 (s). Anal. calcd. for  $\text{C}_{11}\text{H}_{11}\text{F}_7\text{N}_2\text{O}$ : C, 41.26; H, 3.46; N, 8.75. Found: C, 41.58; H, 3.23; N, 8.91.

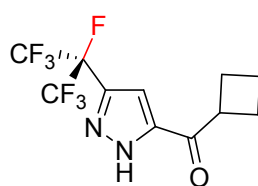

### Cyclobutyl(3-(perfluoropropan-2-yl)-1H-pyrazol-5-yl)methanone (19a)

Yield: 83%; white solid, m.p. 103-105 °C.

$^1\text{H}$  NMR (500 MHz,  $\text{CDCl}_3$ )  $\delta$  11.57 (br s, 1H), 6.94 (s, 2H), 3.83 (p,  $J$  = 8.3 Hz, 1H), 2.51 – 2.40 (m, 2H), 2.38 – 2.24 (m, 2H), 2.21 – 2.06 (m, 1H), 2.02 – 1.89 (m, 1H).  $^{19}\text{F}$  NMR (376 MHz,  $\text{CDCl}_3$ )  $\delta$  -76.6 (d,  $J$  = 8.3 Hz), -180.7 – -180.9 (m).  $^{13}\text{C}$  NMR (126 MHz,  $\text{CDCl}_3$ )  $\delta$  192.0 (s), 141.0 (d,  $J$  = 16.1 Hz), 123.9 – 116.5 (dm), 108.0 (s), 90.6 – 87.7 (m), 43.0 (s), 24.9 (s), 18.4 (s). Anal. calcd. for  $\text{C}_{11}\text{H}_9\text{F}_7\text{N}_2\text{O}$ : C, 41.52; H, 2.85; N, 8.80. Found: C, 41.85; H, 2.68; N, 8.91.

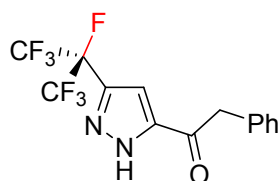

### 1-(3-(Perfluoropropan-2-yl)-1H-pyrazol-5-yl)-2-phenylethan-1-one (20a)

Yield: 78%; white solid, m.p. 62-63 °C.

$^1\text{H}$  NMR (500 MHz,  $\text{CDCl}_3$ )  $\delta$  7.37 (t,  $J$  = 7.2 Hz, 2H), 7.34 – 7.27 (m, 1H), 7.06 (s, 1H), 4.20 (s, 1H).  $^{19}\text{F}$  NMR (376 MHz,  $\text{CDCl}_3$ )  $\delta$  -76.6 (d,  $J$  = 8.4 Hz), 180.9 (p,  $J$  = 8.9 Hz).  $^{13}\text{C}$  NMR (126 MHz,  $\text{CDCl}_3$ )  $\delta$  188.3 (s), 141.9 (s), 140.8 (d,  $J$  = 26.2 Hz), 132.5 (s), 129.6 (s), 129.1 (s), 127.8 (s), 124.1 – 116.4 (dm), 108.7 (s), 90.5 – 87.7 (m), 46.6 (s). Anal. calcd. for  $\text{C}_{14}\text{H}_9\text{F}_7\text{N}_2\text{O}$ : C, 47.47; H, 2.56; N, 7.91. Found: C, 47.25; H, 2.36; N, 8.12.

### 1-(3-(Perfluoropropan-2-yl)-1H-pyrazol-5-yl)-3-phenylpropan-1-one (21a)

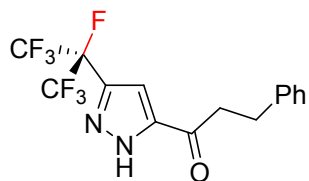

Yield: 91%; yellow oil.

$^1\text{H}$  NMR (500 MHz,  $\text{CDCl}_3$ )  $\delta$  7.32 (m, 2H), 7.25 (m, 3H), 7.24 (s, 1H), 3.10 (t,  $J = 7.5$  Hz, 2H), 3.25 (t,  $J = 7.5$  Hz, 2H).  $^{19}\text{F}$  NMR (376 MHz,  $\text{CDCl}_3$ )  $\delta$  -76.6 (d,  $J = 8.4$  Hz), -180.9 (p,  $J = 8.2$  Hz).

hAnal. calcd. for  $\text{C}_{15}\text{H}_{11}\text{F}_7\text{N}_2\text{O}$ : C, 48.92; H, 3.01; N, 7.61. Found: C, 48.71; H, 3.34; N, 7.85.

### (3-(Perfluoropropan-2-yl)-1H-pyrazol-5-yl)(phenyl)methanone (22a)

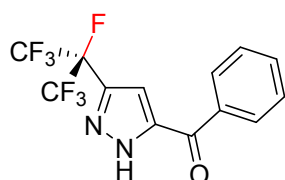

Yield: 97%; white solid, m.p. 75-76 °C.

$^1\text{H}$  NMR (500 MHz,  $\text{DMSO-d}_6$ )  $\delta$  14.95 (br s, 1H), 7.94 (d,  $J = 7.4$  Hz, 2H), 7.74 (t,  $J = 7.3$  Hz, 1H), 7.61 (t,  $J = 7.6$  Hz, 2H), 7.27 (s, 1H).  $^{19}\text{F}$  NMR (376 MHz,  $\text{DMSO-d}_6$ )  $\delta$  -75.8 (d,  $J = 9.0$  Hz), -178.6 (br s).  $^{13}\text{C}$  NMR (126 MHz,  $\text{DMSO-d}_6$ )  $\delta$  183.6 (s), 141.1 (s), 138.4 (d,  $J = 26.6$  Hz), 136.1 (s), 133.7 (s), 129.2 (s), 129.0 (s), 124.6 – 115.3 (dm), 109.9 (s), 91.2 – 87.0 (m). Anal. calcd. for  $\text{C}_{13}\text{H}_7\text{F}_7\text{N}_2\text{O}$ : C, 45.90; H, 2.07; N, 8.23. Found: C, 45.80; H, 2.26; N, 8.44.

### (3-(Perfluoropropan-2-yl)-1H-pyrazol-5-yl)(*p*-tolyl)methanone (23a)

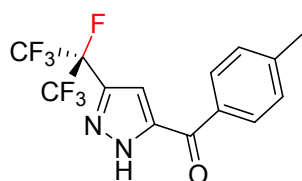

Yield: 96%; white solid, m.p. 72-73 °C.

$^1\text{H}$  NMR (500 MHz,  $\text{DMSO-d}_6$ )  $\delta$  14.91 (br s, 1H), 7.86 (d,  $J = 7.5$  Hz, 2H), 7.41 (d,  $J = 7.5$  Hz, 2H), 7.40 (s, 1H), 2.42 (s, 3H).  $^{19}\text{F}$  NMR (376 MHz,  $\text{DMSO-d}_6$ )  $\delta$  -75.8 (d,  $J = 9.0$  Hz), -178.7 (br s).  $^{13}\text{C}$  NMR (126 MHz,  $\text{DMSO-d}_6$ )  $\delta$  183.2 (s), 145.8 (s), 144.4 (s), 129.7 (s), 129.5 (s), 129.4 (s), 129.3 (s), 121.3 – 118.5 (dm), 109.6 (s), 21.2 (s). Anal. calcd. for  $\text{C}_{14}\text{H}_9\text{F}_7\text{N}_2\text{O}$ : C, 47.47; H, 2.56; N, 7.91. Found: C, 47.15; H, 2.81; N, 7.73.

**(4-Fluorophenyl)(3-(perfluoropropan-2-yl)-1H-pyrazol-5-yl)methanone (24a)**

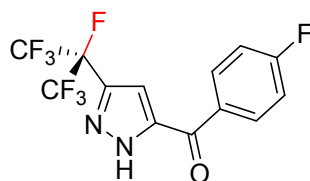

Yield: 94%; white solid, m.p. 100-101 °C.

<sup>1</sup>H NMR (500 MHz, DMSO-d<sub>6</sub>) δ 14.95 (s, 1H), 8.04 (dd, *J* = 7.8, 5.6 Hz, 2H), 7.43 (t, *J* = 8.7 Hz, 2H), 7.30 (s, 1H). <sup>19</sup>F NMR (376 MHz, DMSO-d<sub>6</sub>) δ -75.9 (d, *J* = 9.2 Hz), -105.5 (s), -178.7 (br s). <sup>13</sup>C NMR (101 MHz, DMSO-d<sub>6</sub>) δ 182.2 (s), 165.3 (d, *J* = 252.6 Hz), 141.0 (s), 138.5 (d, *J* = 26.7 Hz), 132.7 (d, *J* = 2.7 Hz), 132.3 (d, *J* = 9.6 Hz), 124.5 – 116.4 (dm), 116.1 (d, *J* = 22.1 Hz), 110.0 (s), 90.8 – 87.3 (m). Anal. calcd. for C<sub>13</sub>H<sub>6</sub>F<sub>8</sub>N<sub>2</sub>O: C, 43.59; H, 1.69; N, 7.82. Found: C, 43.80; H, 1.91; N, 7.51.

**(3-(Perfluoropropan-2-yl)-1H-pyrazol-5-yl)(3-(trifluoromethyl)phenyl)methanone (25a)**

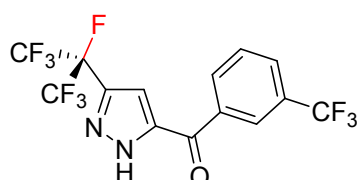

Yield: 88%; white solid, m.p. 80-81 °C.

<sup>1</sup>H NMR (500 MHz, DMSO-d<sub>6</sub>) δ 15.04 (s, 1H), 8.23 (d, *J* = 7.5 Hz, 1H), 8.14 (s, 1H), 8.08 (d, *J* = 7.5 Hz, 1H), 7.85 (t, *J* = 7.7 Hz, 1H), 7.31 (s, 1H). <sup>19</sup>F NMR (376 MHz, DMSO-d<sub>6</sub>) δ -62.0 (br s), -75.9 (d, *J* = 6.5 Hz), -178.6 (br s). <sup>13</sup>C NMR (101 MHz, DMSO-d<sub>6</sub>) δ 182.6 (s), 140.8 (s), 138.6 (d, *J* = 26.9 Hz), 137.0 (s), 133.3 (s), 130.3 (s), 129.9 – 129.7 (m), 129.5 (s), 125.5 (d, *J* = 3.9 Hz), 124.6 – 115.1 (dm), 123.7 (q, *J* = 272.3 Hz), 110.4 (s), 91.1 – 86.2 (m). Anal. calcd. for C<sub>14</sub>H<sub>6</sub>F<sub>10</sub>N<sub>2</sub>O: C, 41.19; H, 1.48; N, 6.86. Found: C, 41.35; H, 1.22; N, 6.99.

**(4-Bromo-2-fluorophenyl)(3-(perfluoropropan-2-yl)-1H-pyrazol-5-yl)methanone (26a)**

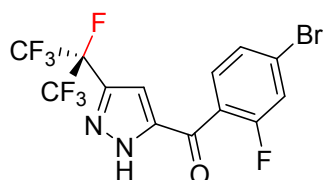

Yield: 91%; white solid, m.p. 102-103 °C.

<sup>1</sup>H NMR (500 MHz, DMSO-d<sub>6</sub>) δ 15.06 (s, 1H), 7.81 (d, *J* = 9.5 Hz, 1H), 7.70 (t, *J* = 7.8 Hz, 1H), 7.64 (d, *J* = 8.1 Hz, 1H), 7.25 (s, 1H). <sup>19</sup>F NMR (376 MHz, DMSO-d<sub>6</sub>) δ -75.9 (d, *J* = 9.0 Hz), -110.9 (t, *J* = 9.6 Hz), -178.8 (br s). <sup>13</sup>C NMR (101 MHz, DMSO-d<sub>6</sub>) δ 180.7 (s), 159.5 (d, *J* = 257.2



Hz), 141.9 (s), 138.6 (d,  $J = 26.8$  Hz), 132.3 (s), 128.3 (s), 126.9 (d,  $J = 9.9$  Hz), 124.5 (d,  $J = 13.5$  Hz), 120.3 (d,  $J = 24.9$  Hz), 123.9 – 113.8 (dm), 110.7 (s), 91.6 – 85.3 (m). Anal. calcd. for  $C_{13}H_5BrF_8N_2O$ : C, 35.72; H, 1.15; N, 6.41. Found: C, 35.97; H, 1.04; N, 6.68.

### Dimethyl 3-(perfluoropropan-2-yl)-1H-pyrazole-4,5-dicarboxylate (30a)

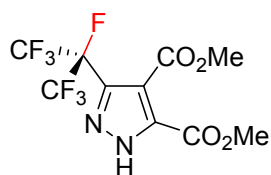

Yield: 53%; yellow oil.

$^1H$  NMR (500 MHz,  $CDCl_3$ )  $\delta$  3.96 (s, 3H), 3.94 (s, 3H).  $^{19}F$  NMR (376 MHz,  $CDCl_3$ )  $\delta$  -76.7 (d,  $J = 8.9$  Hz), -181.3 (p,  $J = 8.8$  Hz).  $^{13}C$  NMR (101 MHz,  $CDCl_3$ )  $\delta$  162.8 (s), 158.0 (s), 137.8 (d,  $J = 28.0$  Hz), 133.5 (s), 121.7 – 117.7 (dm), 118.3 (s), 89.8 – 88.1 (m), 53.3 (s), 53.2 (s). Anal. calcd. for  $C_{10}H_7F_7N_2O_4$ : C, 34.11; H, 2.00; N, 7.95. Found: C, 34.45; H, 2.25; N, 7.58.

### Diethyl 3-(perfluoropropan-2-yl)-1H-pyrazole-4,5-dicarboxylate (31a)

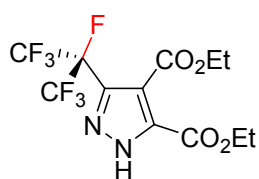

Yield: 59%; yellow oil.

$^1H$  NMR (500 MHz,  $CDCl_3$ )  $\delta$  4.43-4.39 (m, 4H), 1.39-1.38 (m, 6H).  $^{19}F$  NMR (376 MHz,  $CDCl_3$ )  $\delta$  -76.7 (d,  $J = 8.9$  Hz), -181.3 (p,  $J = 8.9$  Hz).  $^{13}C$  NMR (101 MHz,  $CDCl_3$ )  $\delta$  162.3 (s), 157.7 (s), 137.6 (s), 133.6 (s), 124.7 – 117.3 (dm), 62.6 (s), 62.5 (s), 14.1 (s), 14.0 (s). Anal. calcd. for  $C_{12}H_{11}F_7N_2O_4$ : C, 37.91; H, 2.92; N, 7.37. Found: C, 37.57; H, 3.29; N, 7.50.

**(C) Copies of  $^1\text{H}$ ,  $^{19}\text{F}$  and  $^{13}\text{C}$  NMR spectra**

Crude  $i\text{C}_3\text{F}_7\text{CHN}_2$  (**9**)/ $\text{CDCl}_3$

pkm738

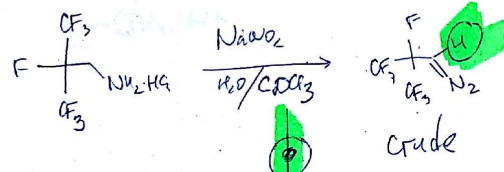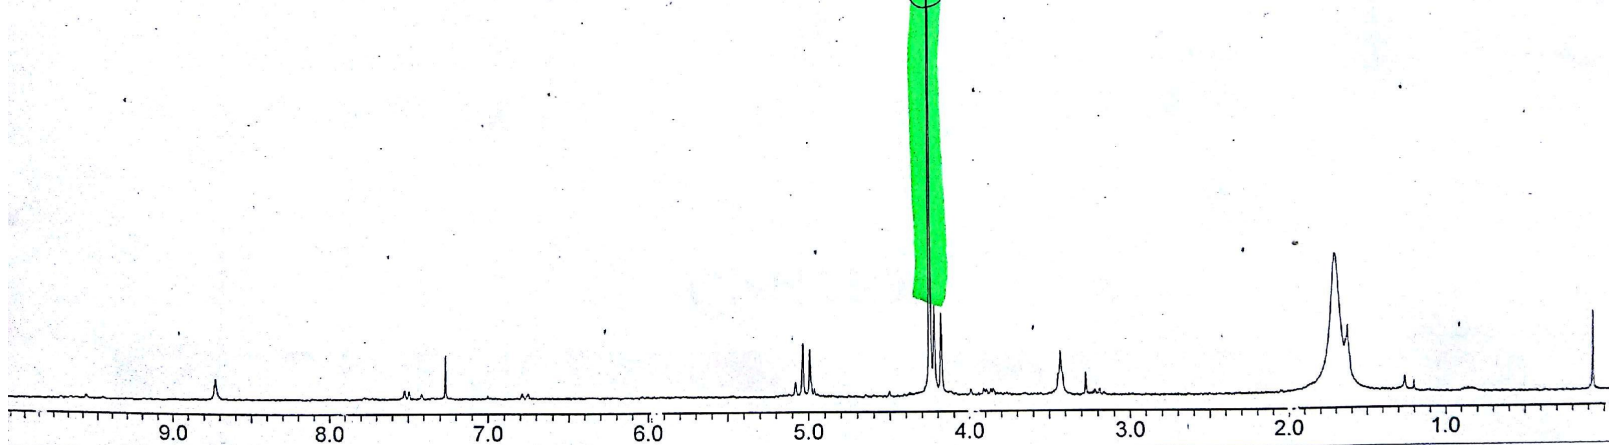

|                   |                  |                  |           |                            |                                     |
|-------------------|------------------|------------------|-----------|----------------------------|-------------------------------------|
| File name: pkm738 | Operator: USER 1 | SF: 400.1300 MHz | NSC: 1    | PW: 9.00 usec, RG: 25      | SI: 32768                           |
| Date: 12-Jul-2017 | Solvent: CDCl3   | SW: 8224 Hz      | TE: 297 K | AQ: 1.99 sec, RD: 0.00 sec | Parameter file, TOPSPIN Version 2.1 |

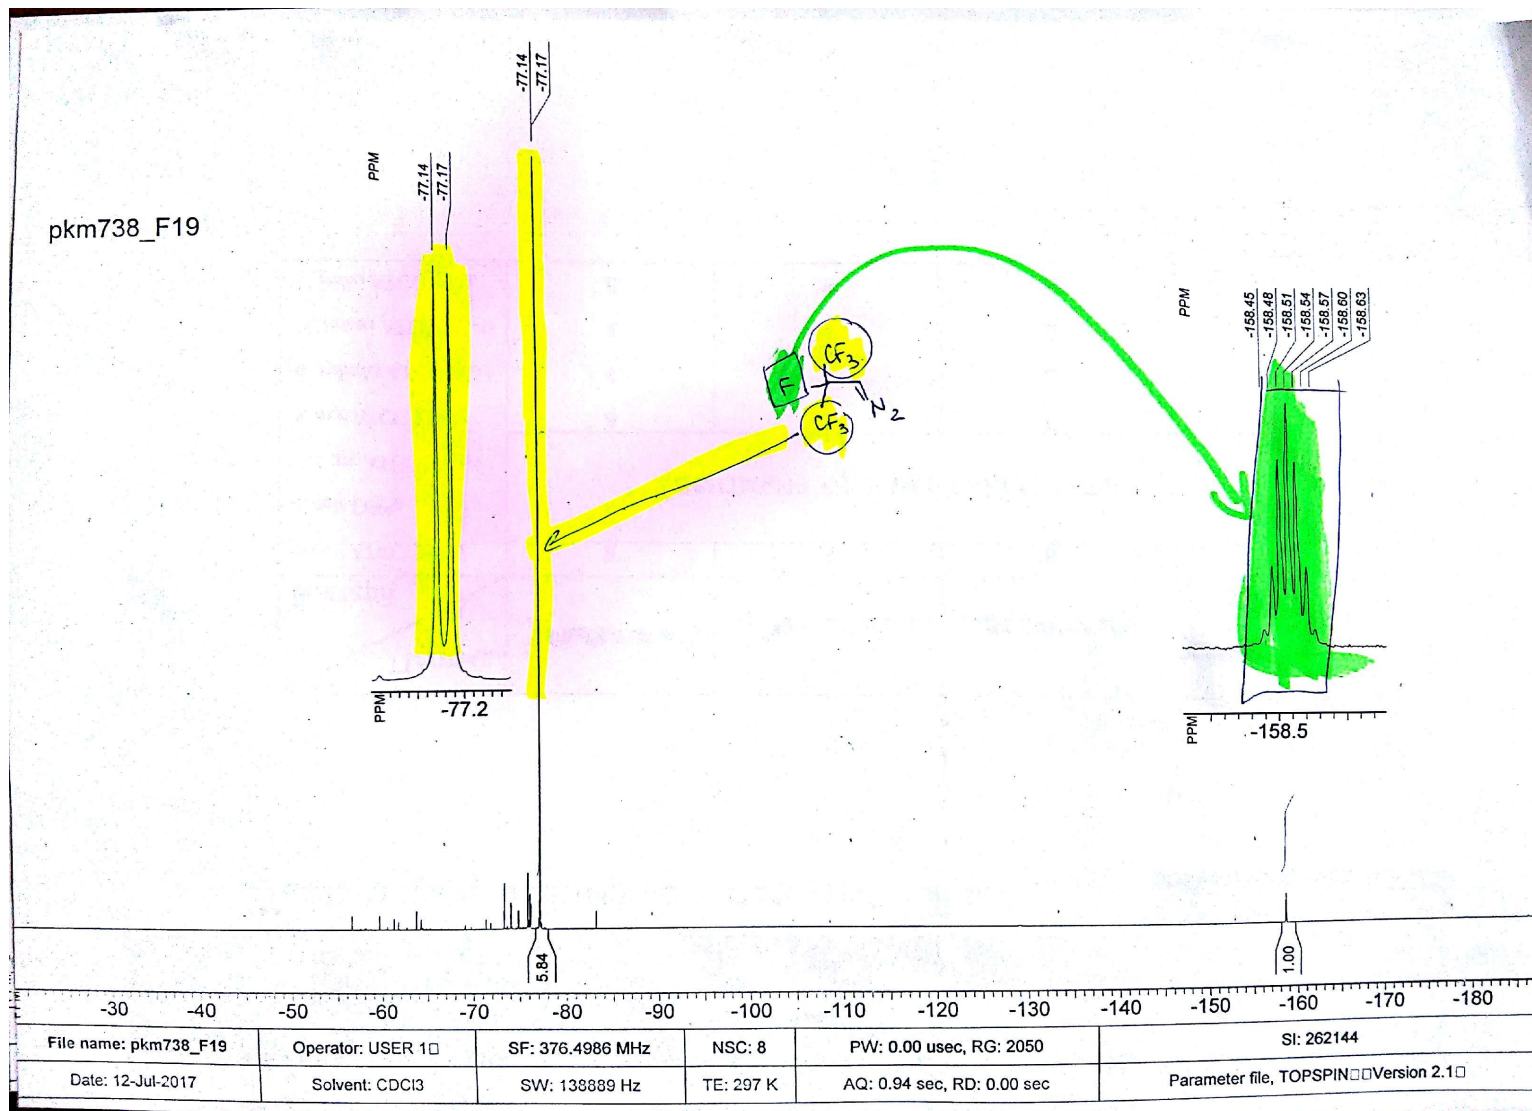

Compound **10a**

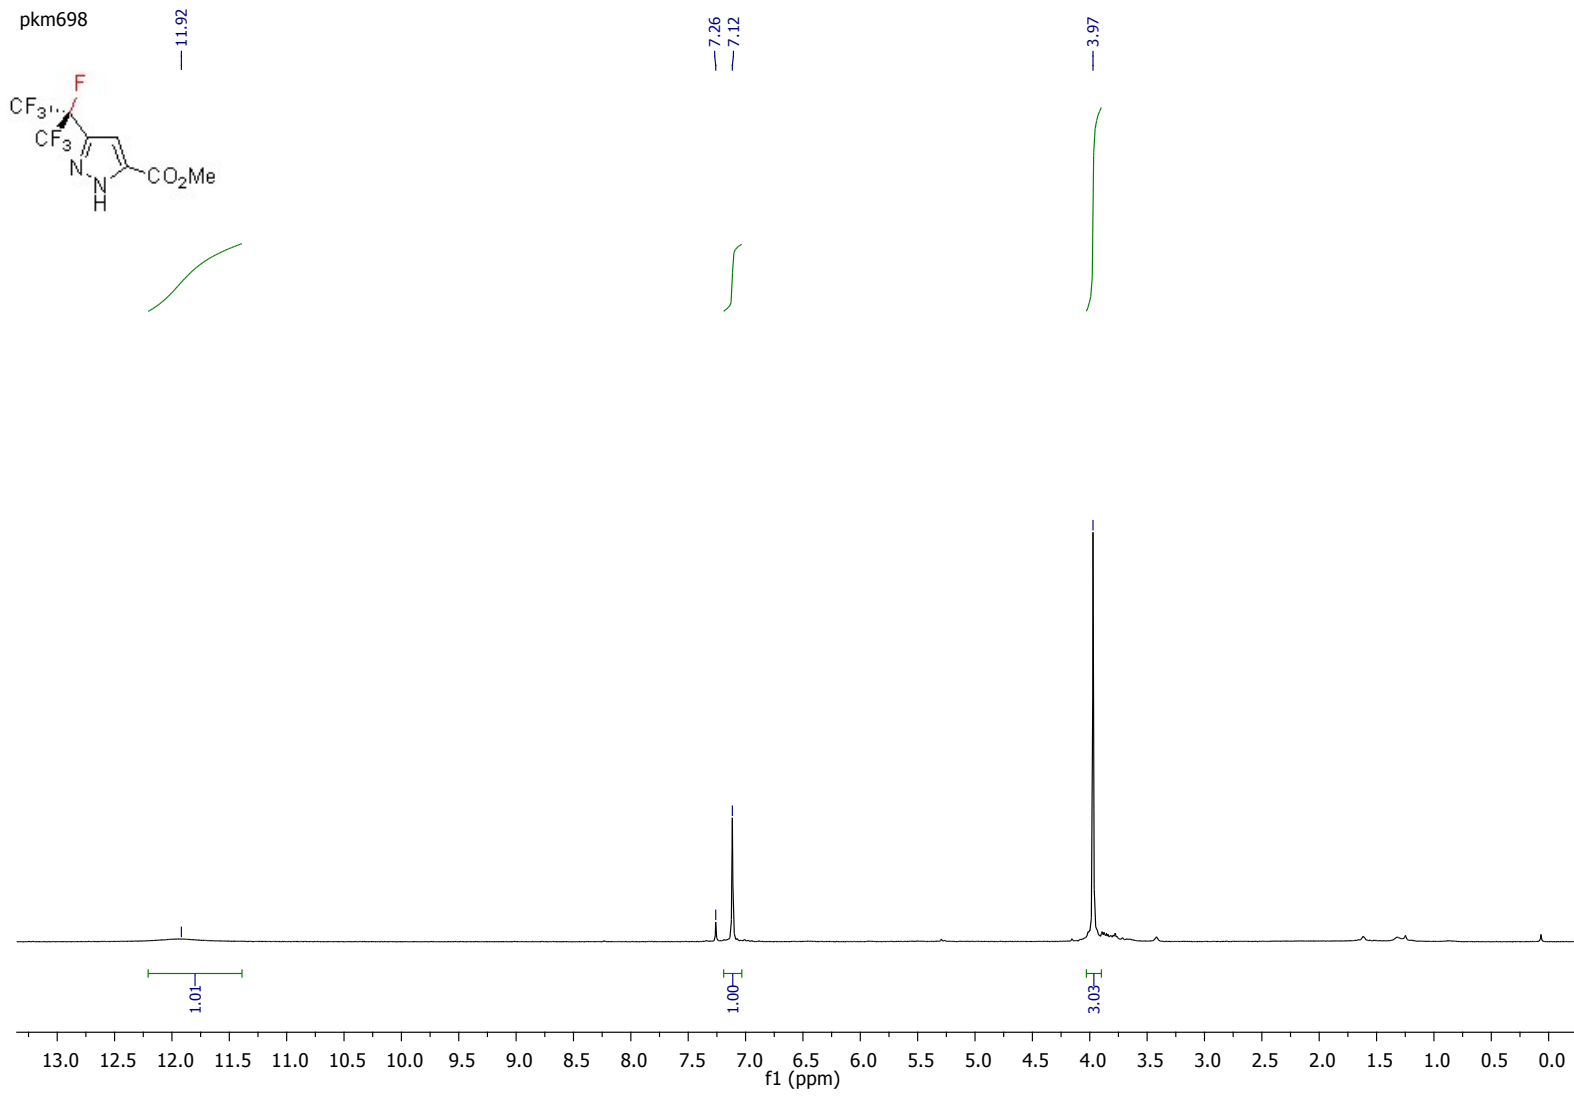

Compound 10a

PKM698-2-F19  
19F

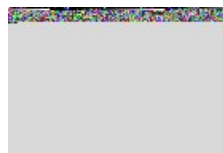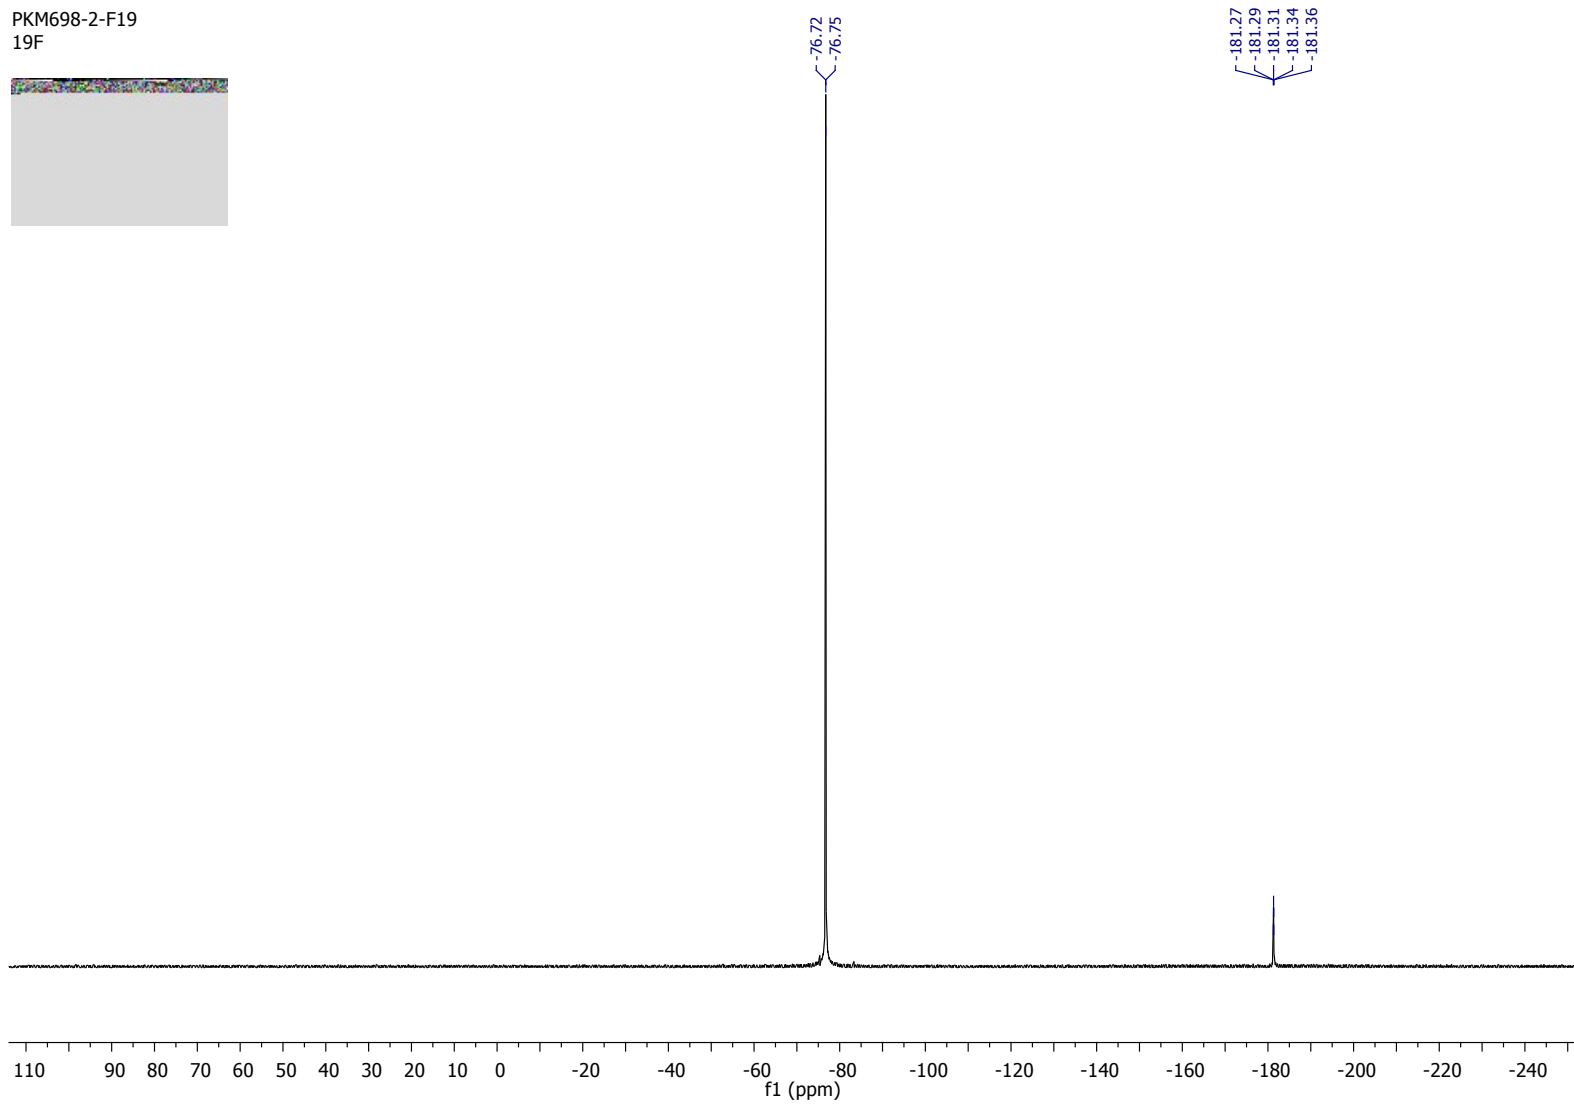

Compound **10a**



pkm698\_C13

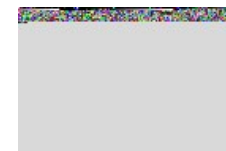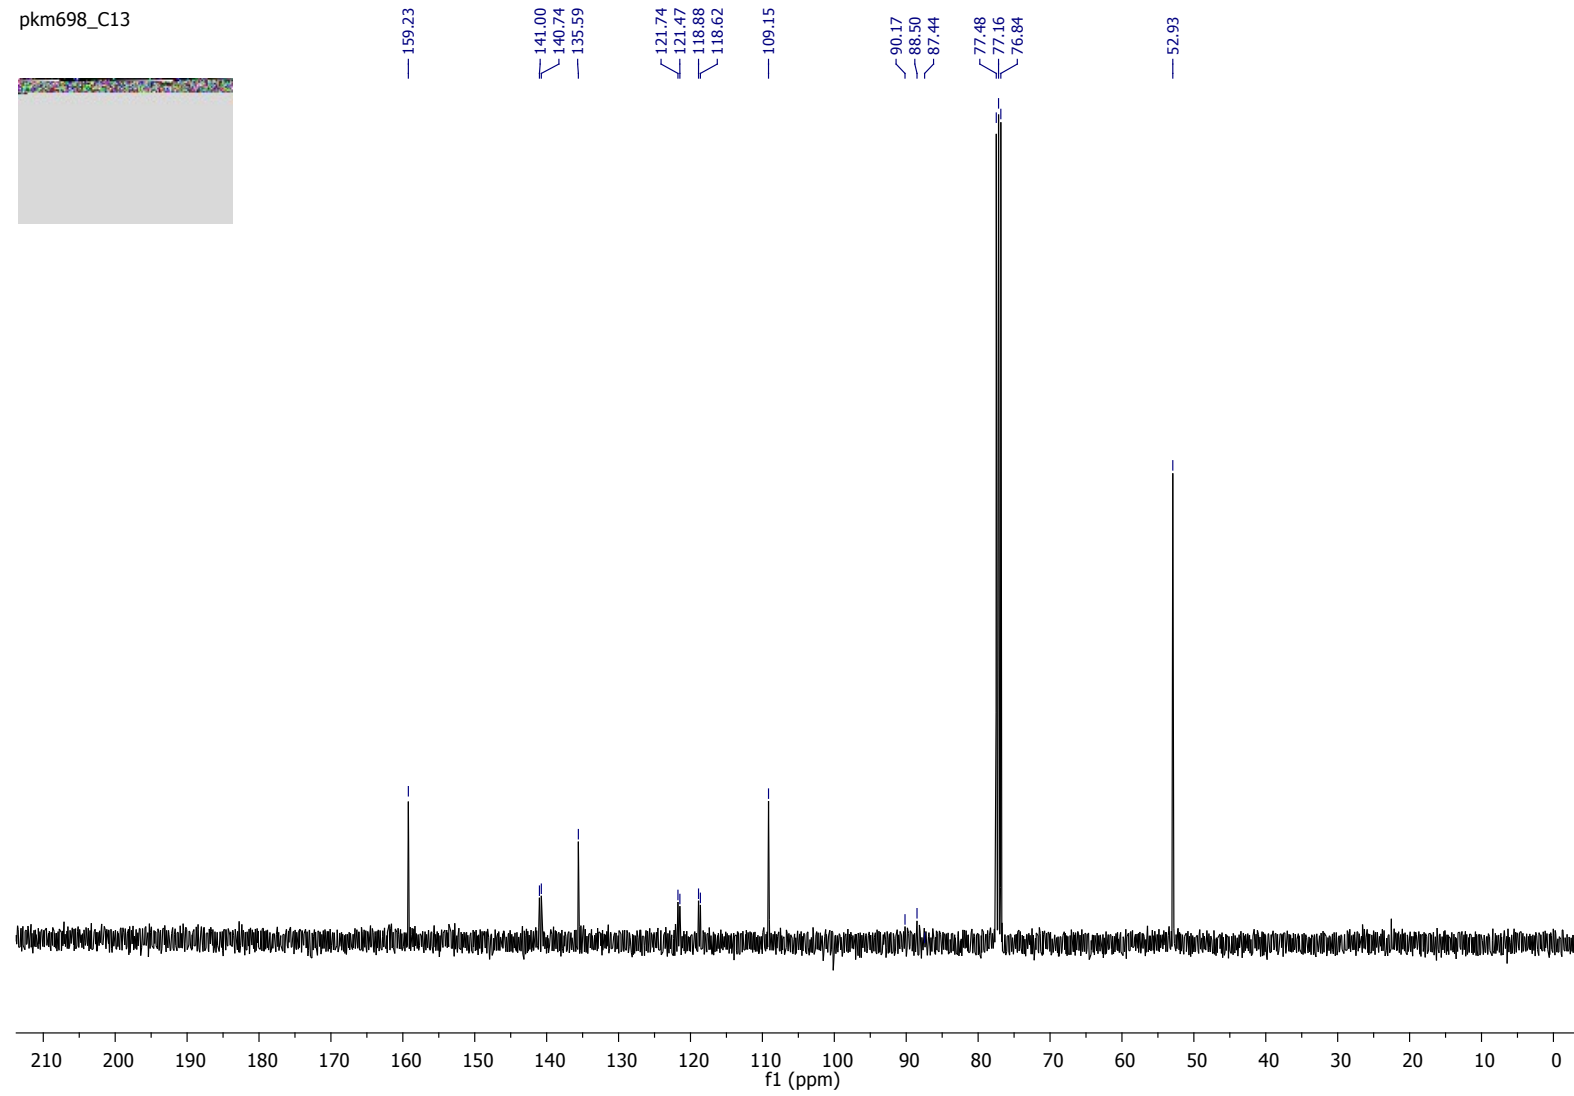

Compound 13a

pkm713

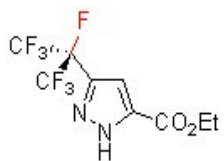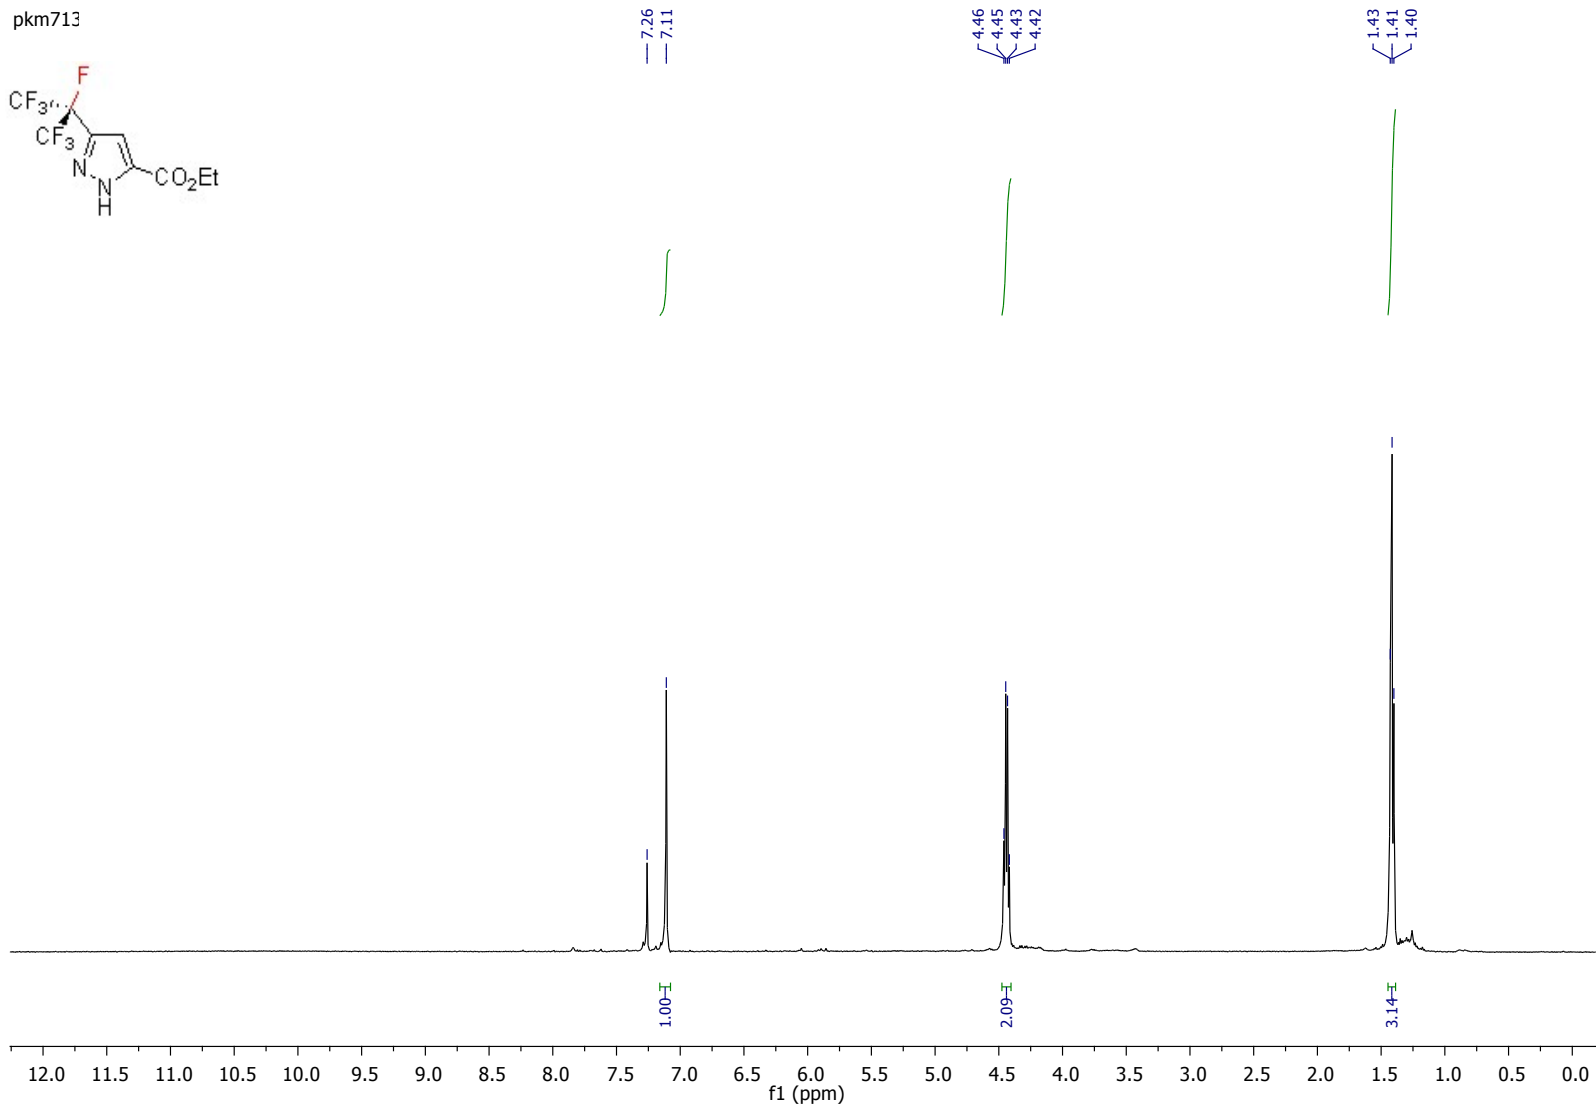

Compound 13a

pkm713\_F19

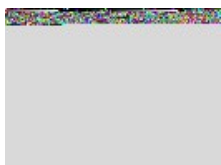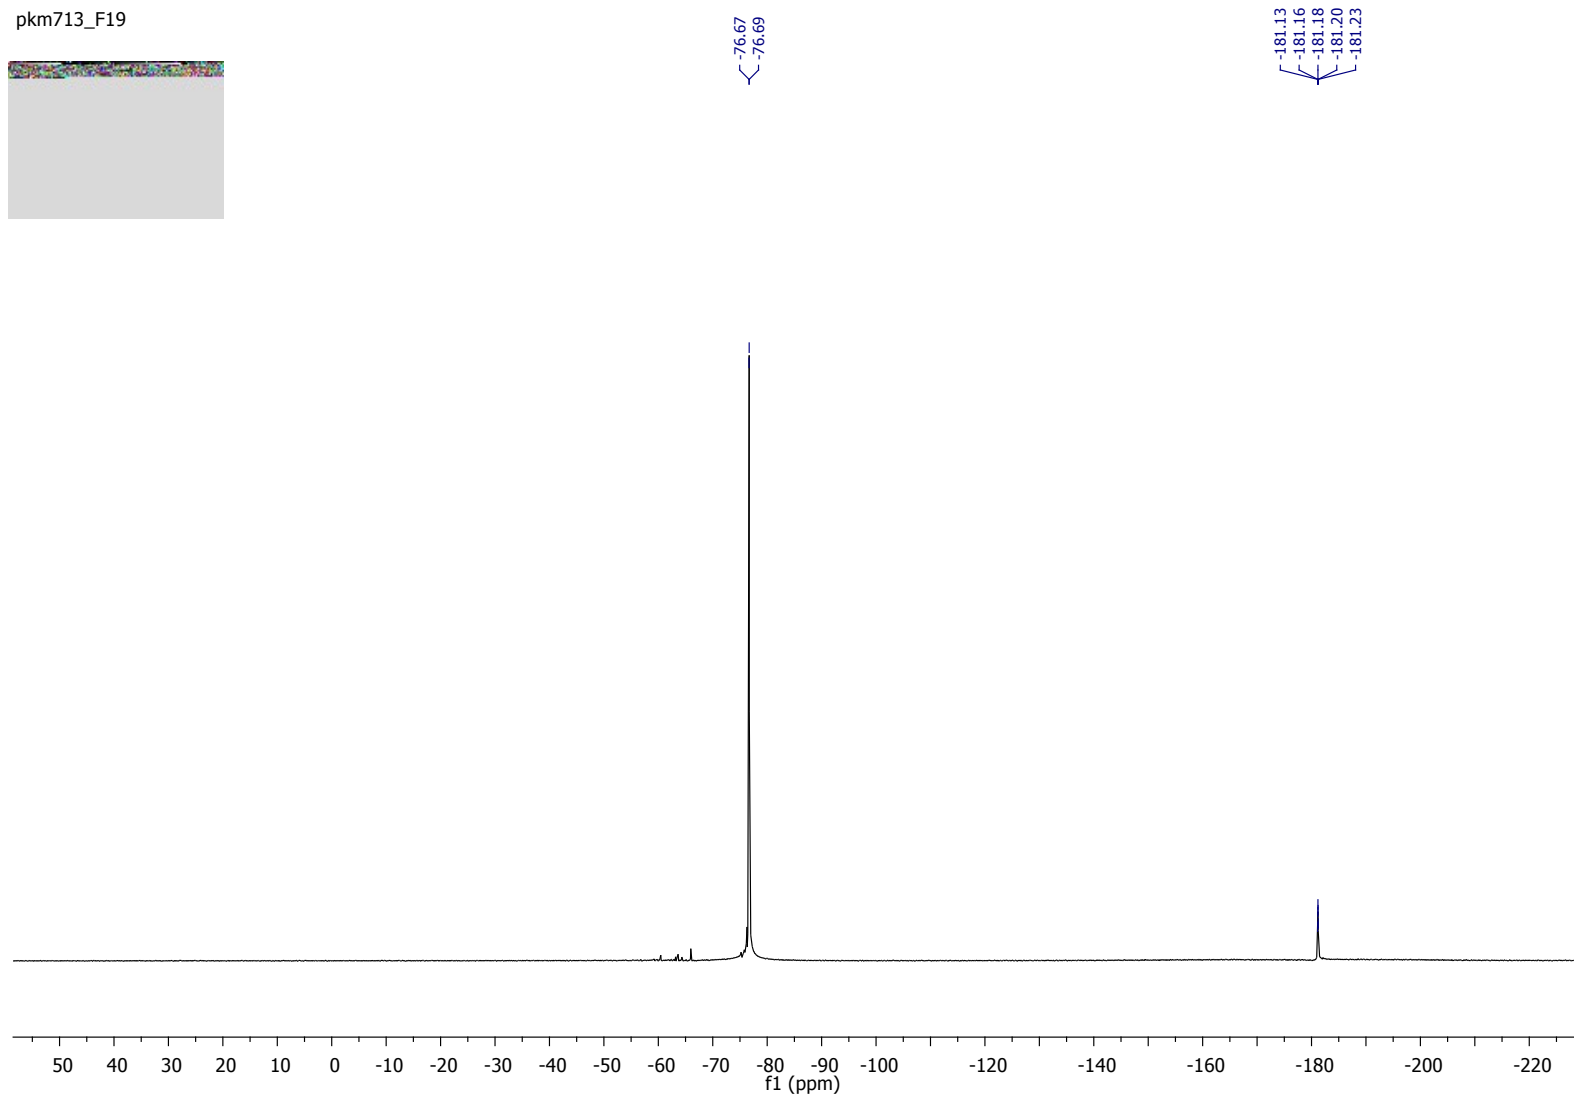

Compound **13a**

pkm713\_C13

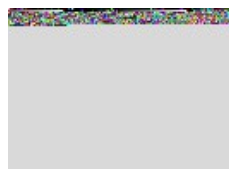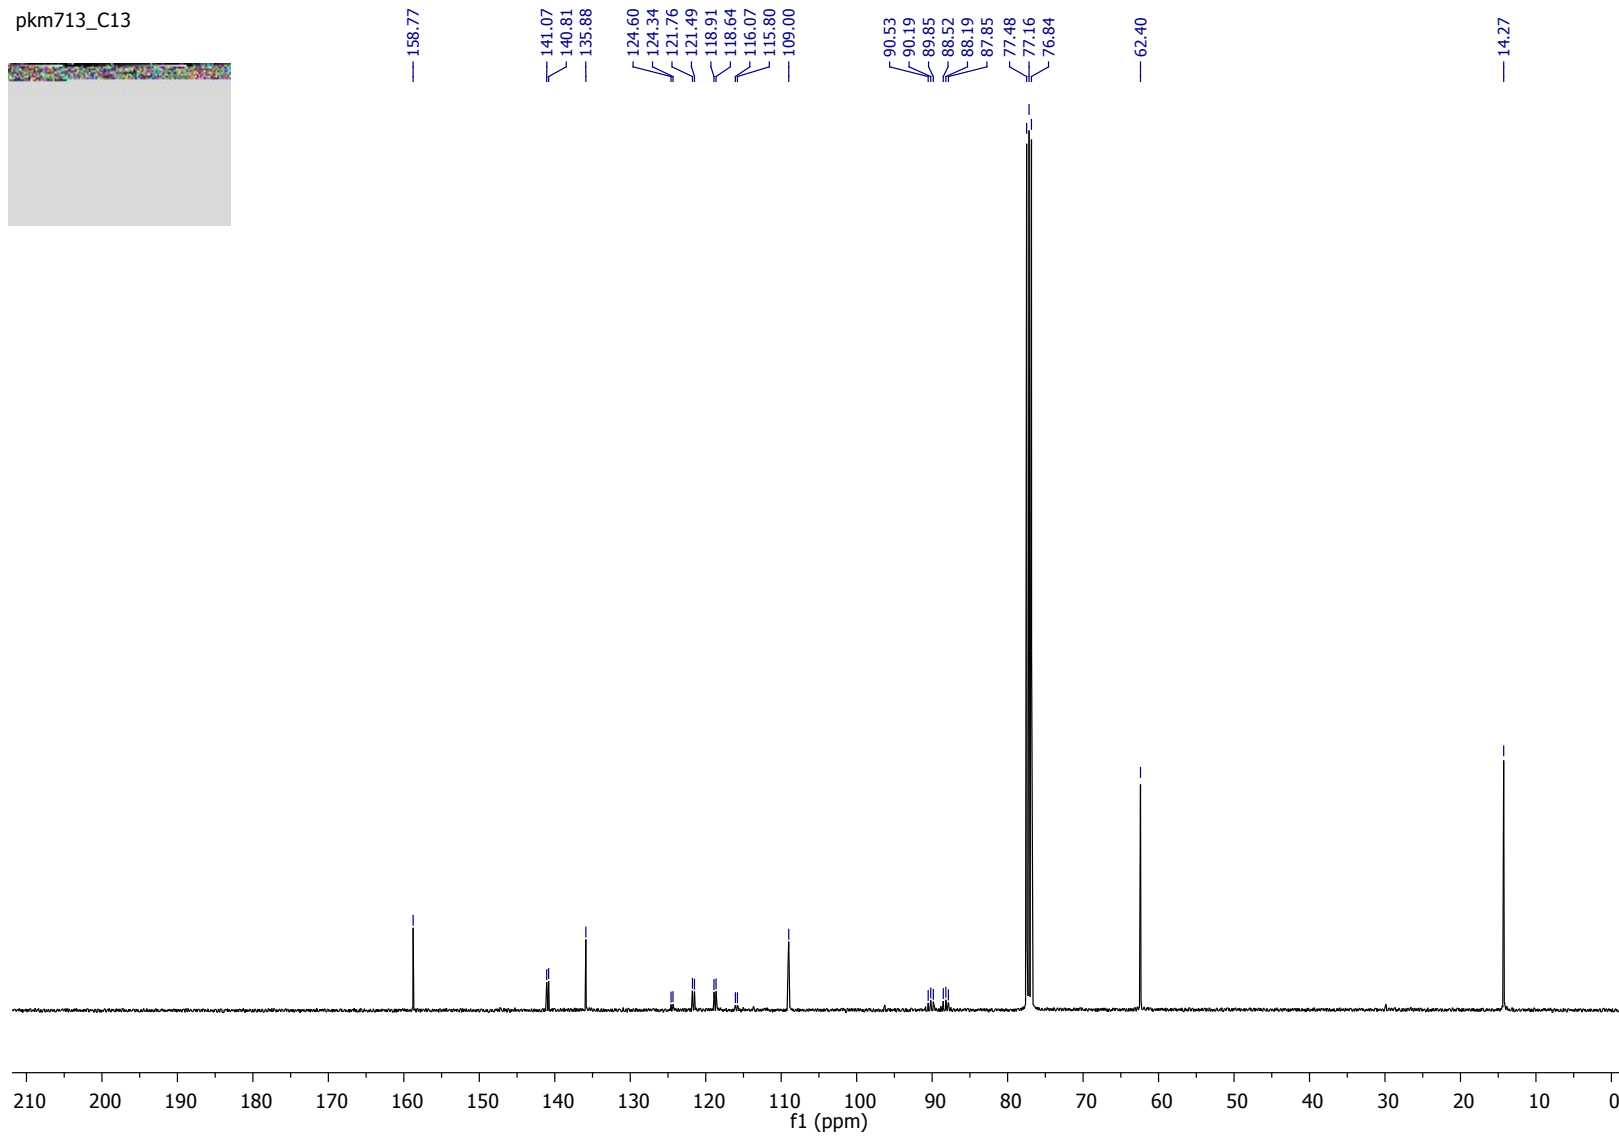

Compound **14a**

pkm725

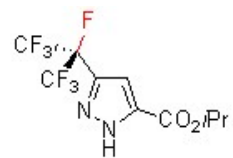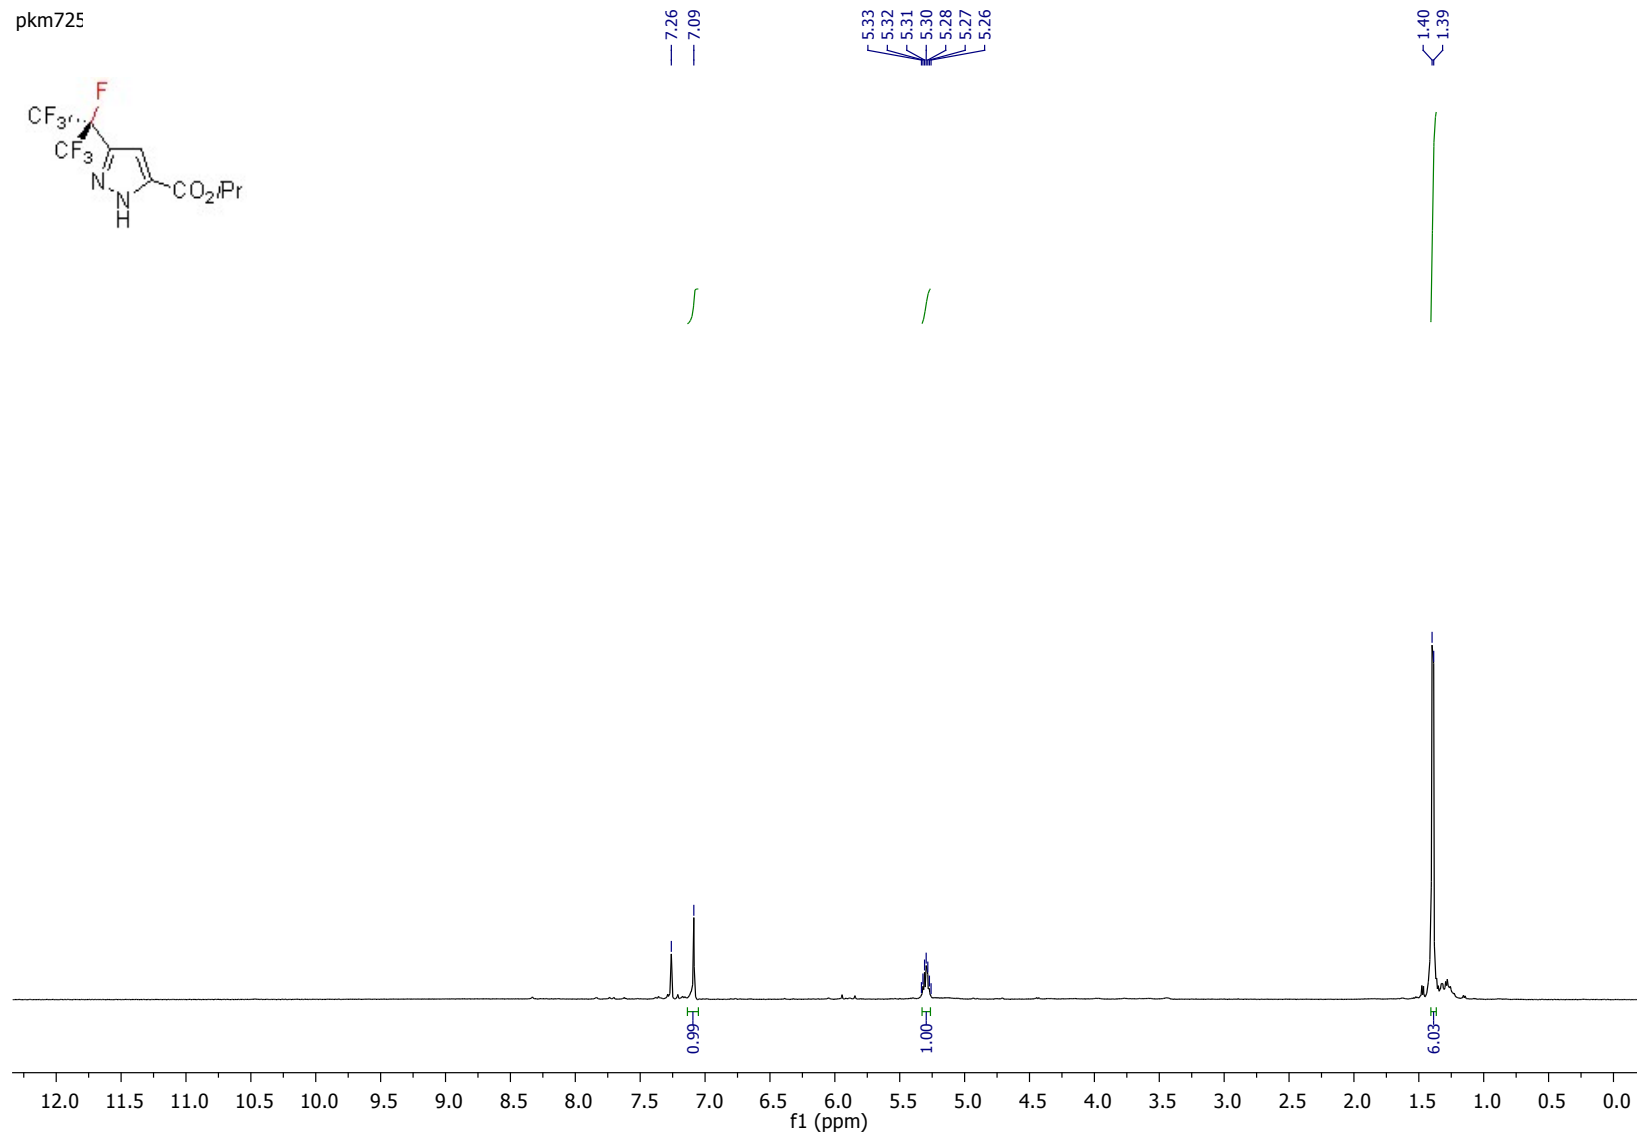

Compound 14a

PKM725\_F19  
19F

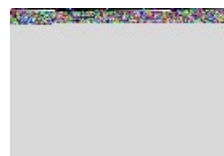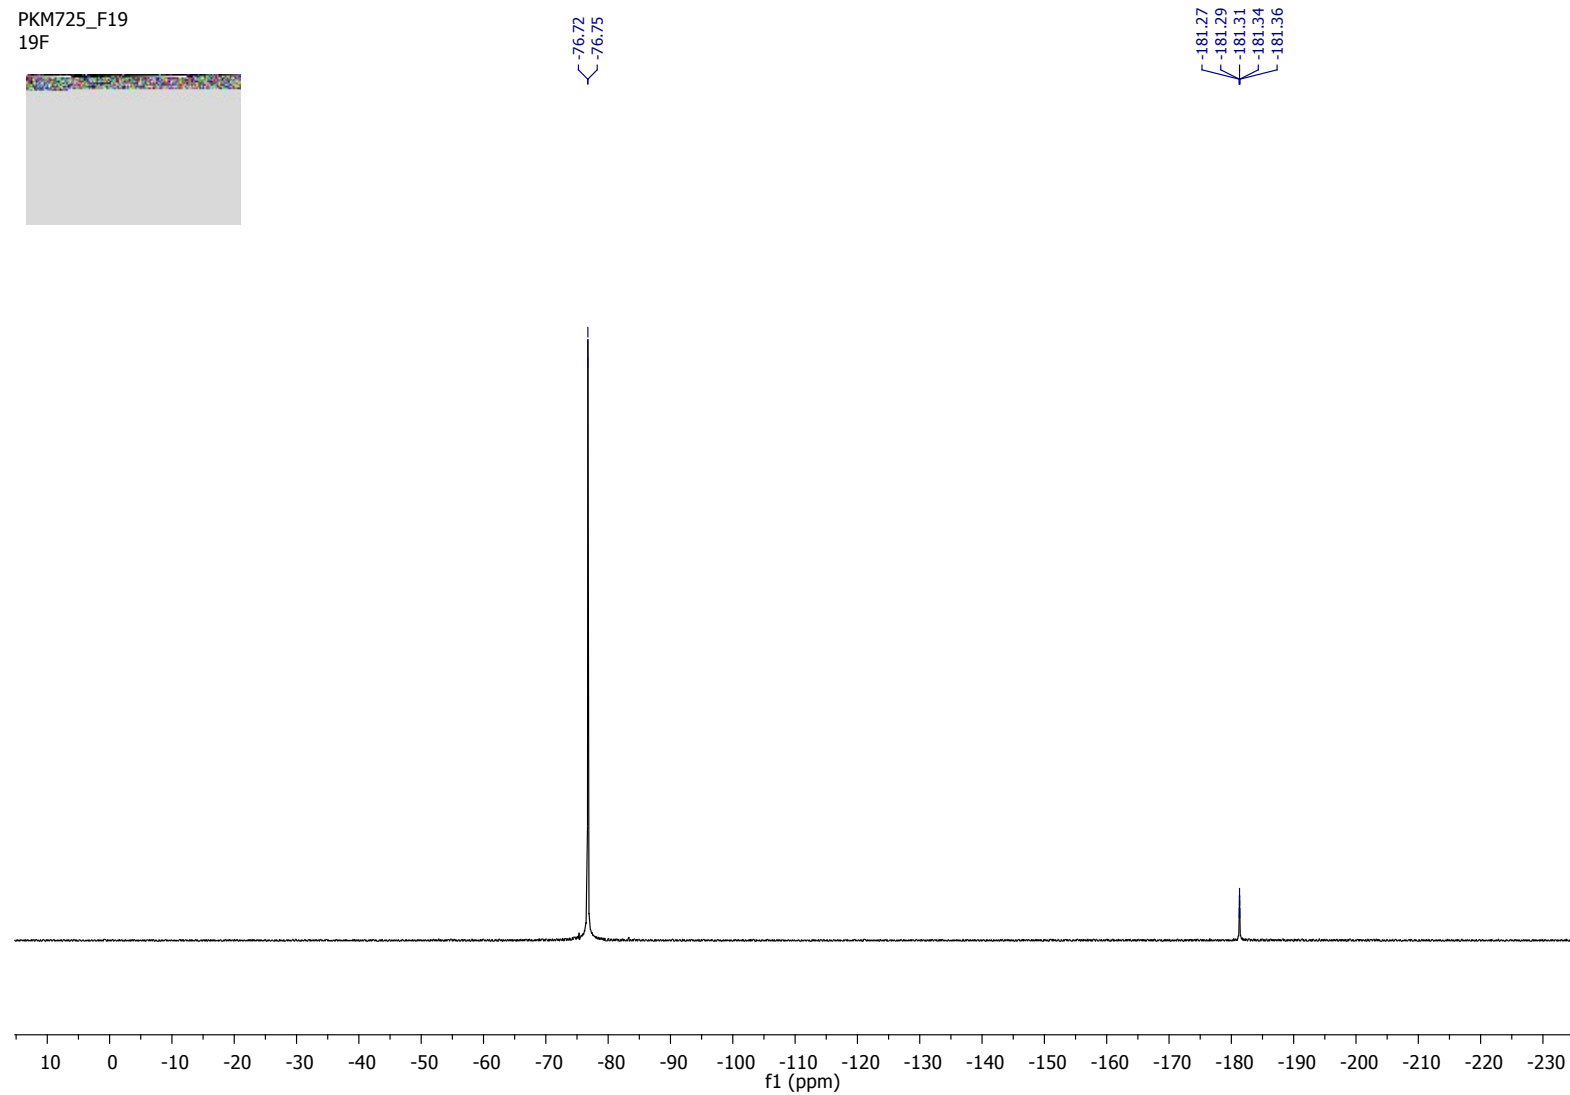

Compound **14a**

pkm725\_C13

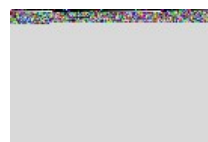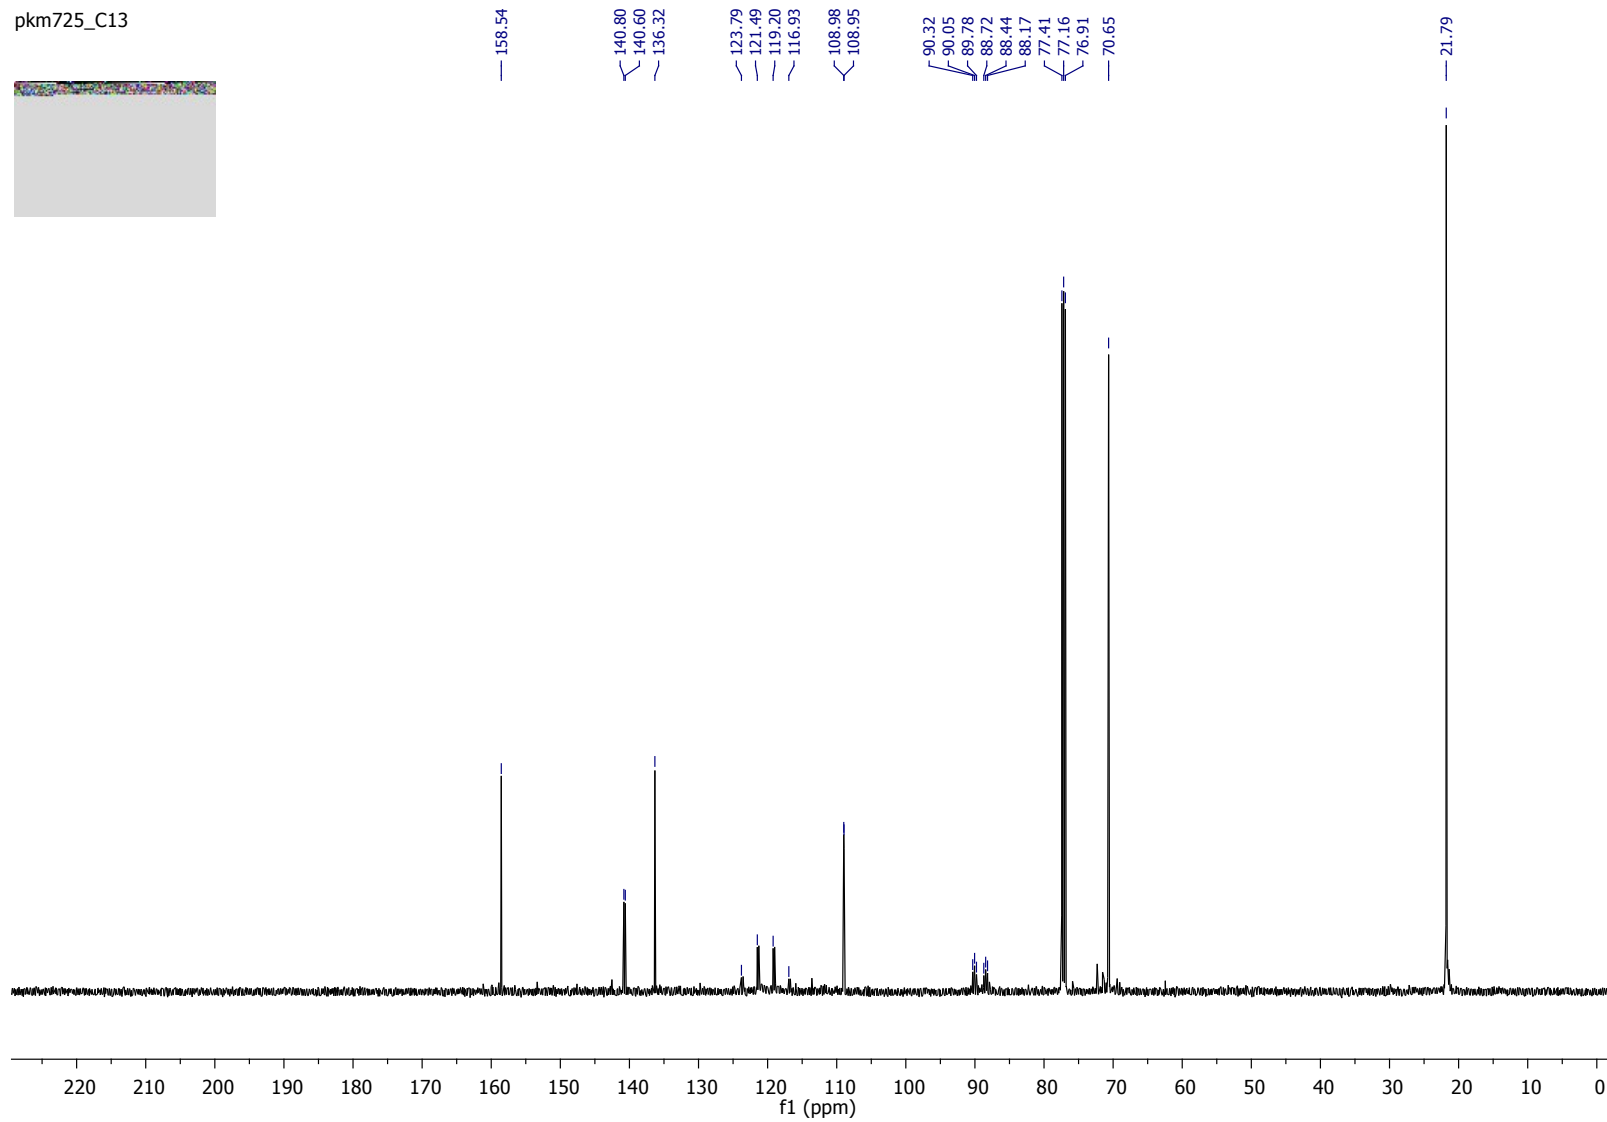

Compound 15a

PPM

pkm726

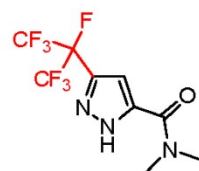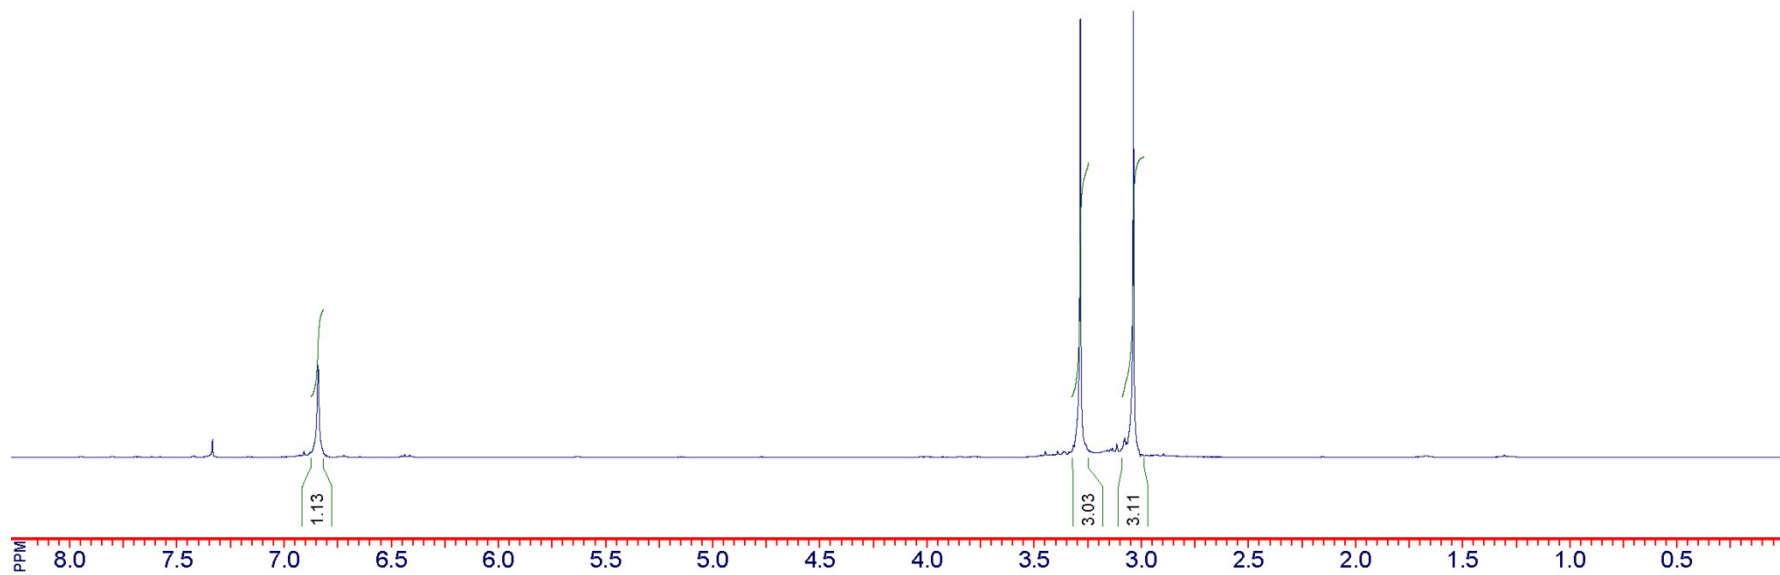

Compound 15a



pkm736\_F19

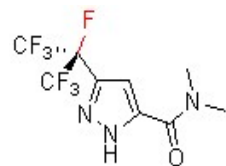

-76.67  
-76.69

-181.13  
-181.16  
-181.18  
-181.20  
-181.23

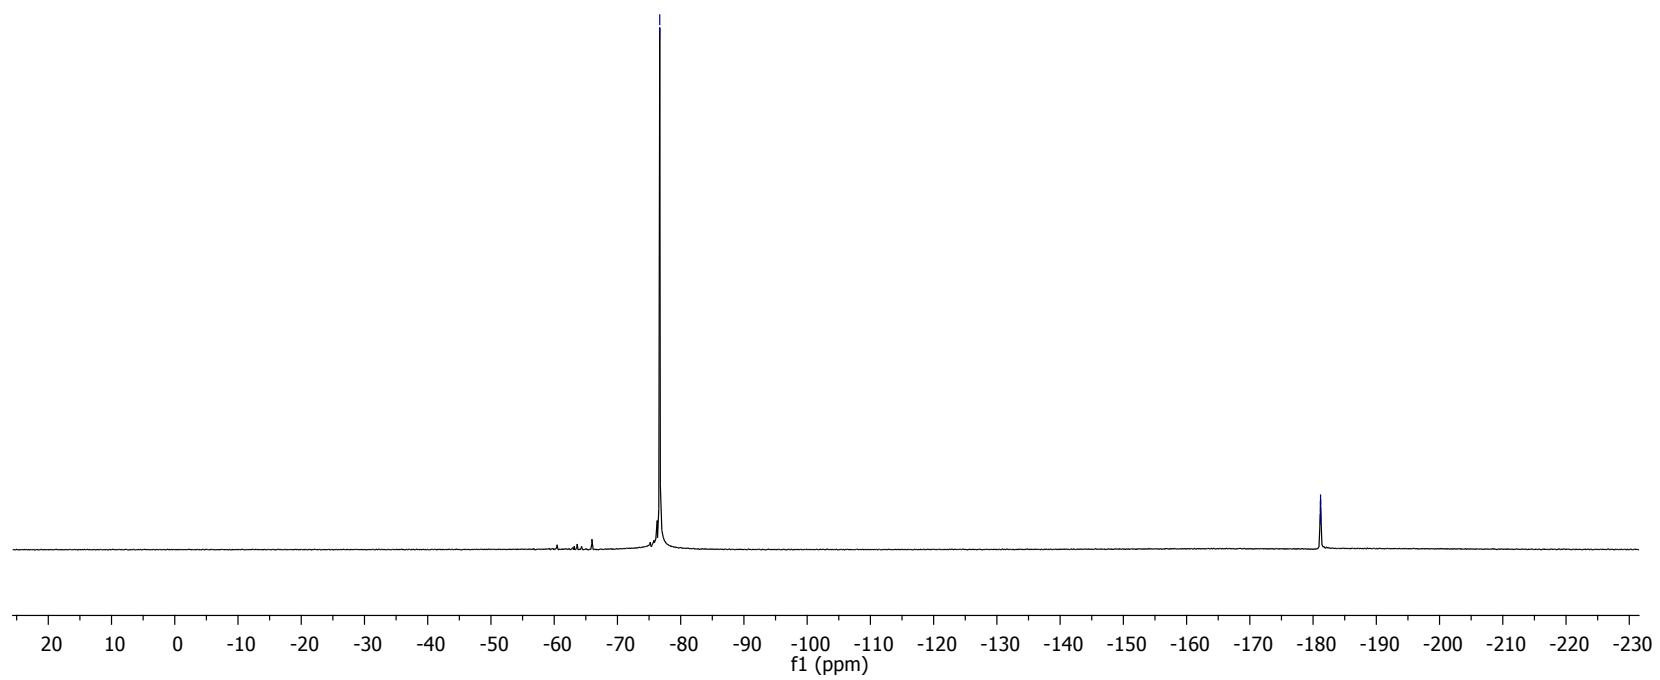

Compound **15a**

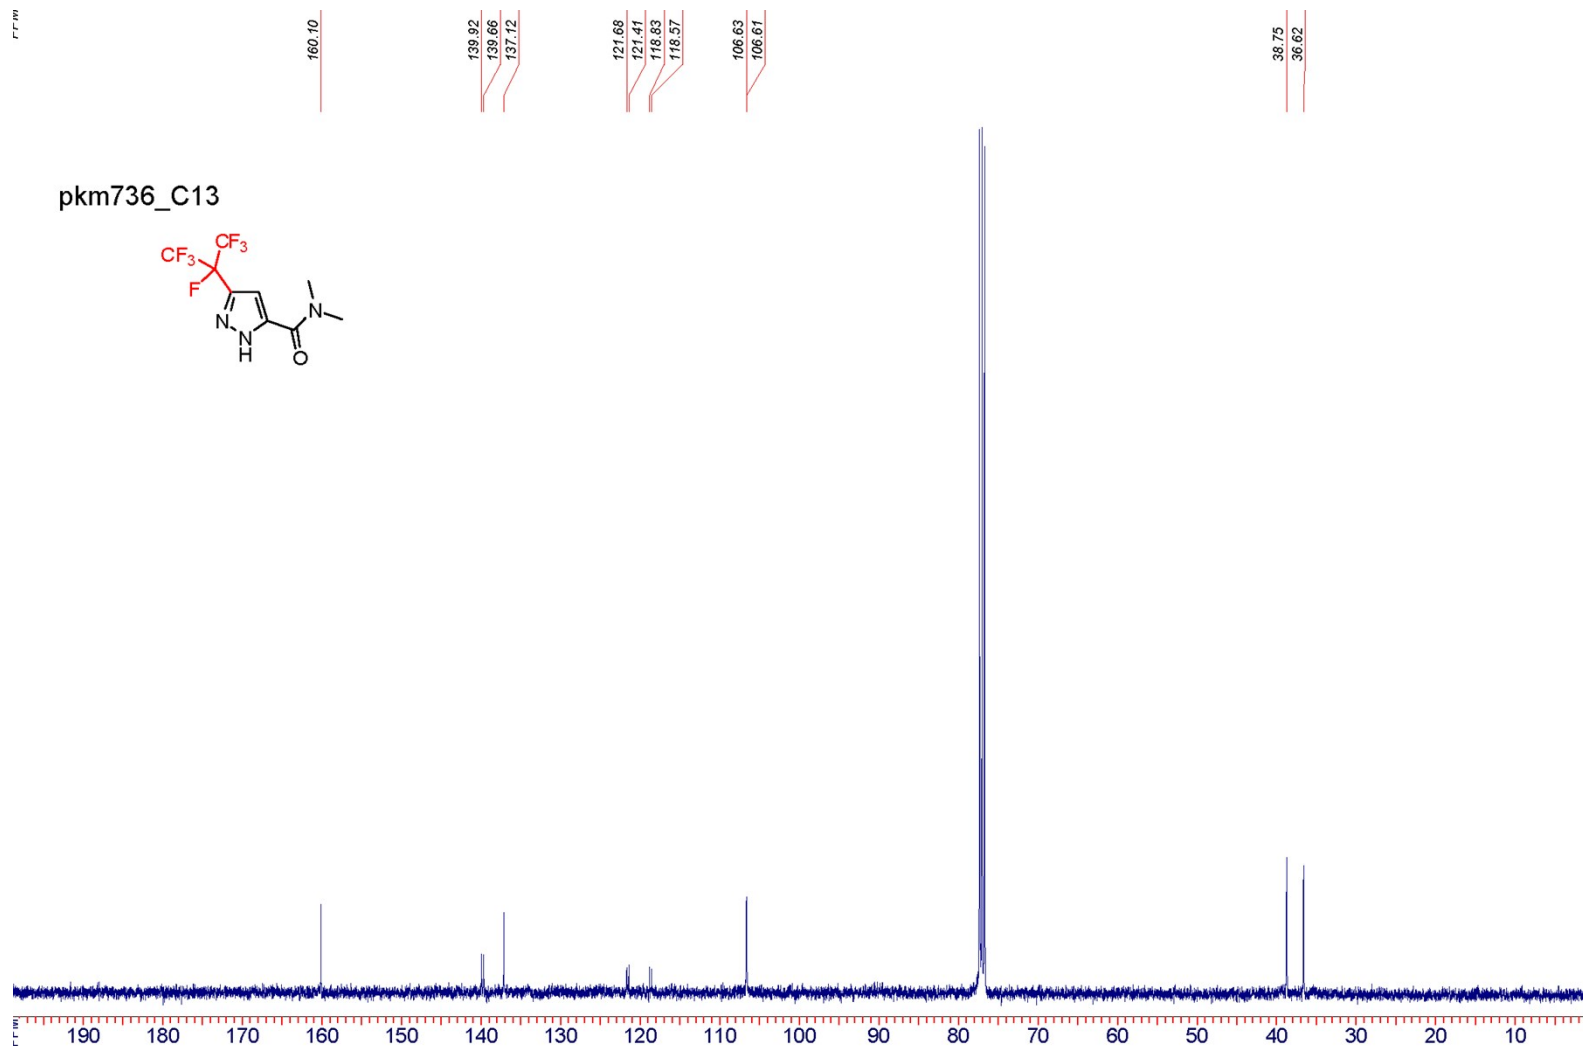

Compound **16a**

pkm715

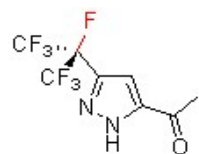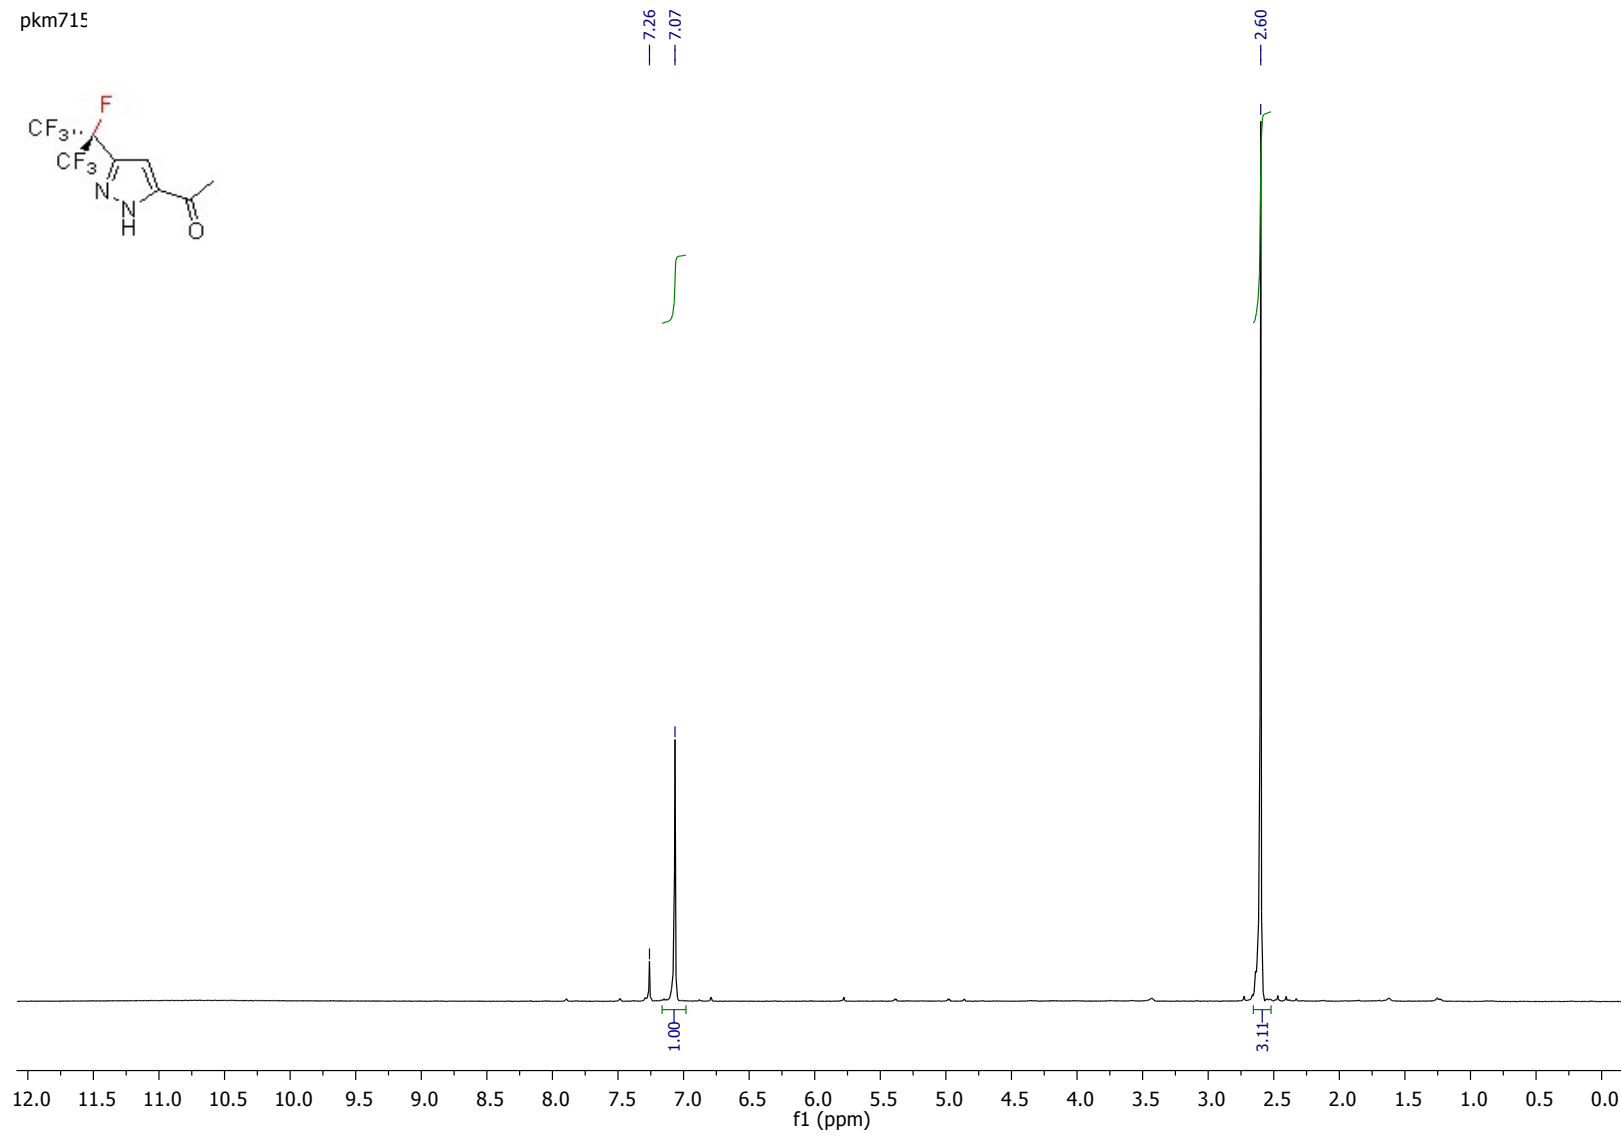

Compound **16a**

pkm715\_F19

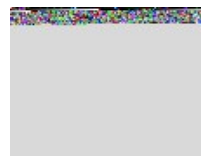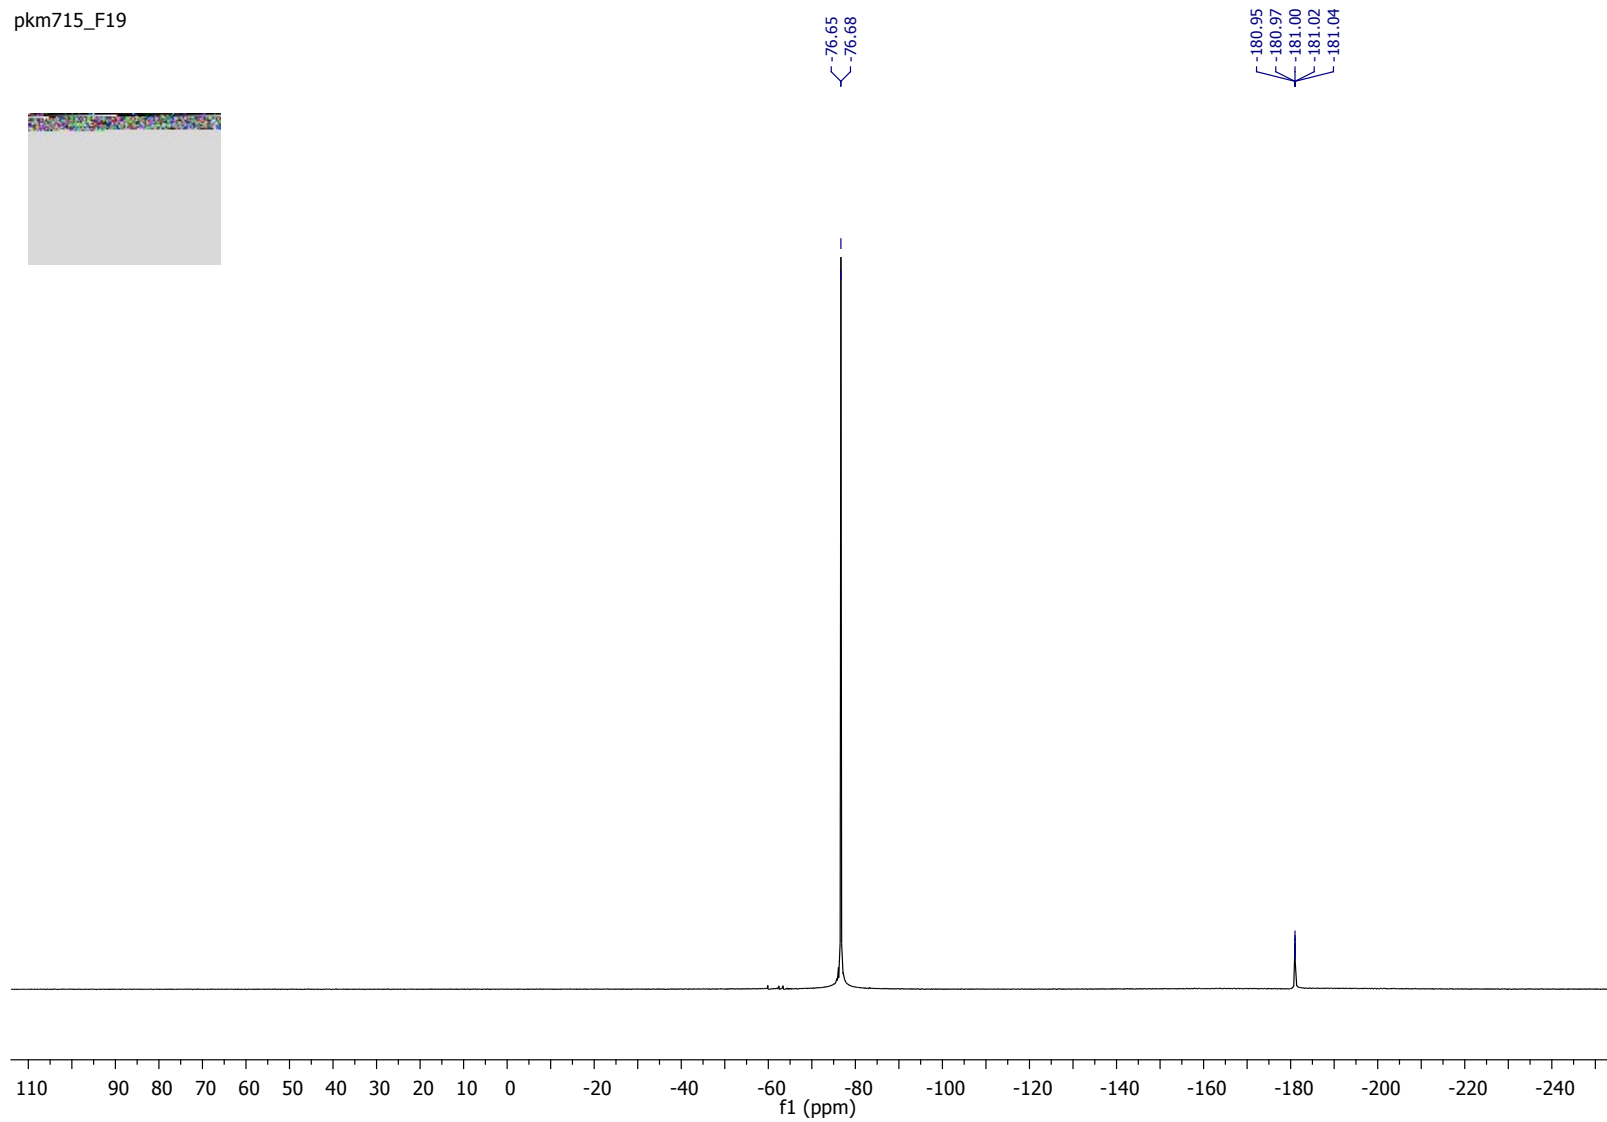

Compound **16a**

pkm715\_C13

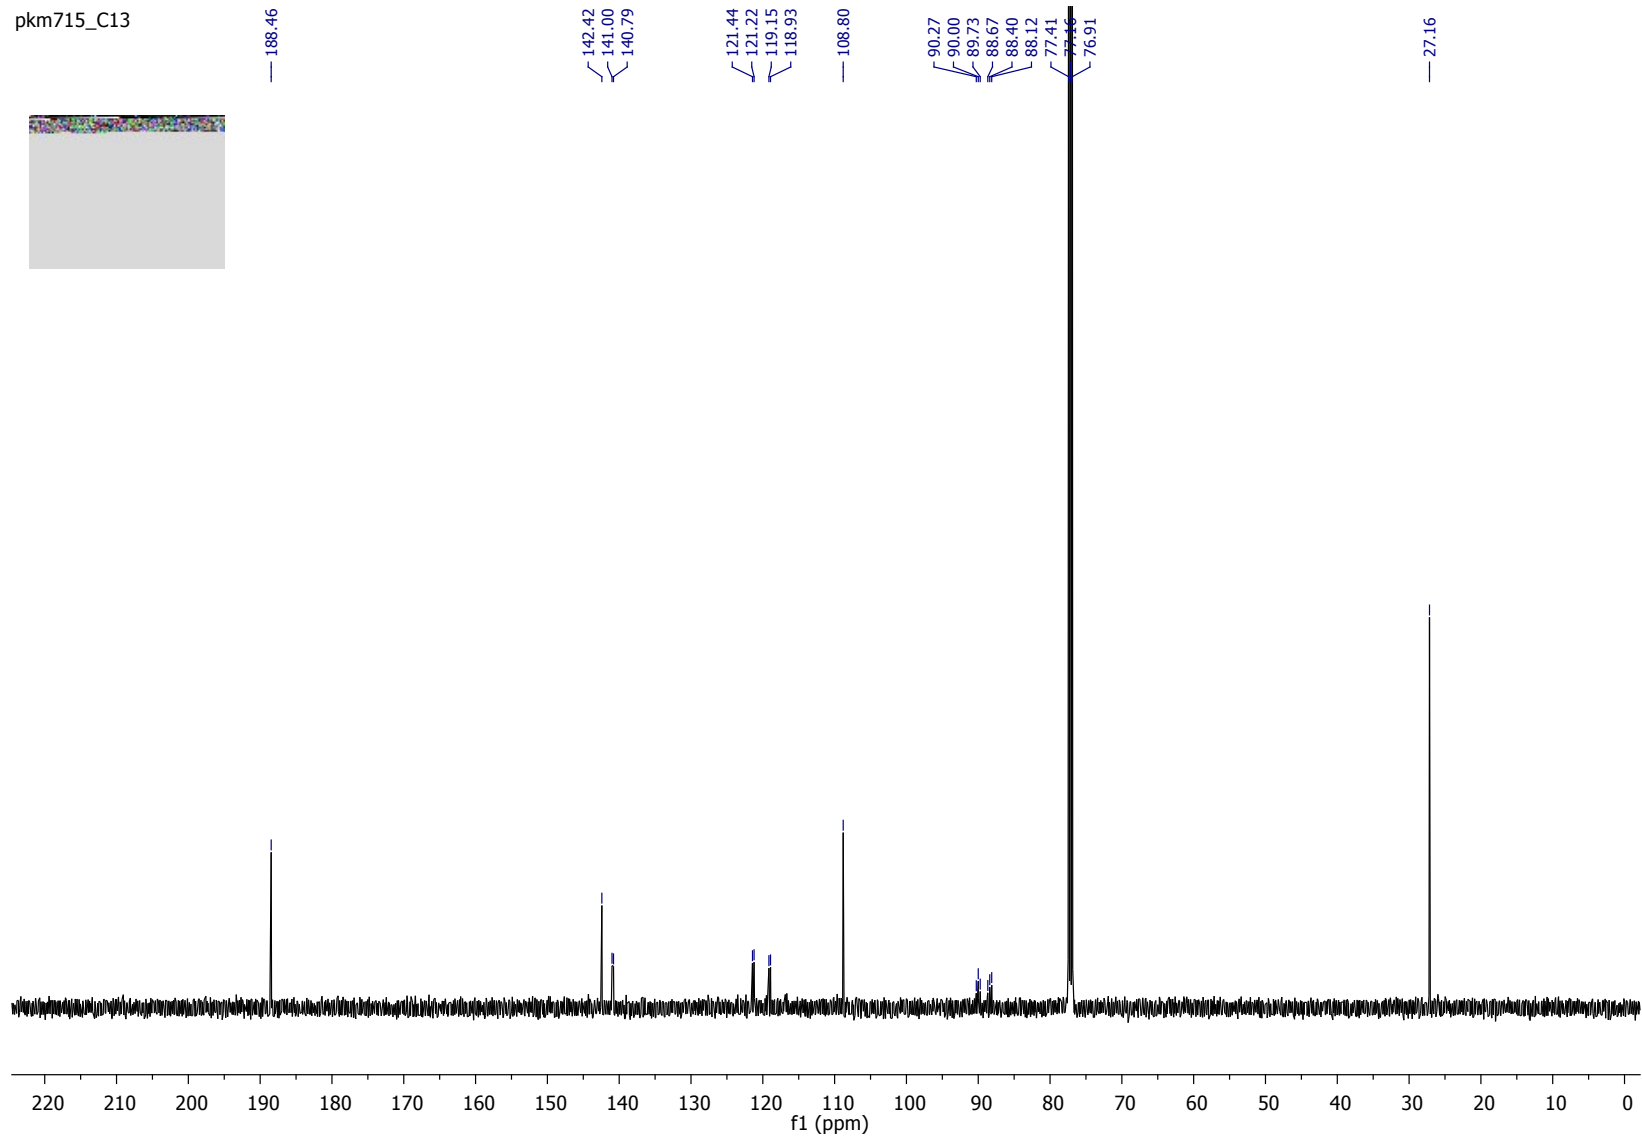

Compound 17a

pkm717

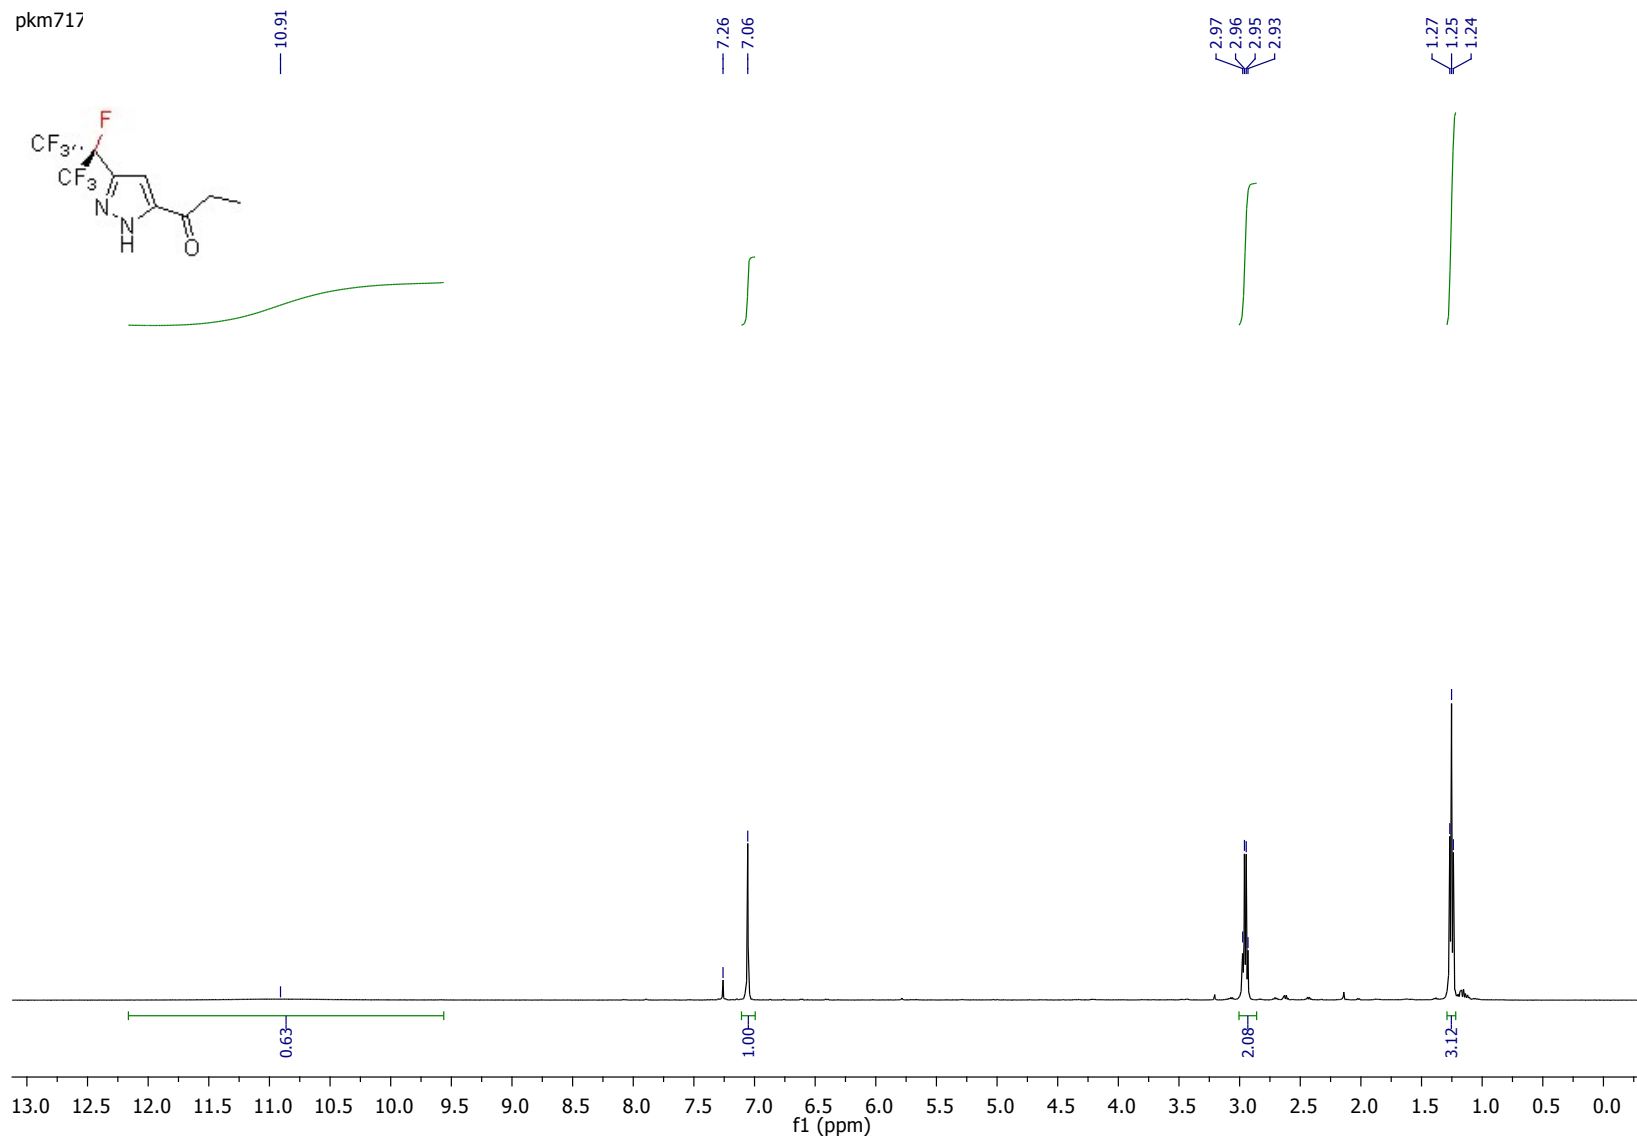

Compound 17a

pkm717\_F19

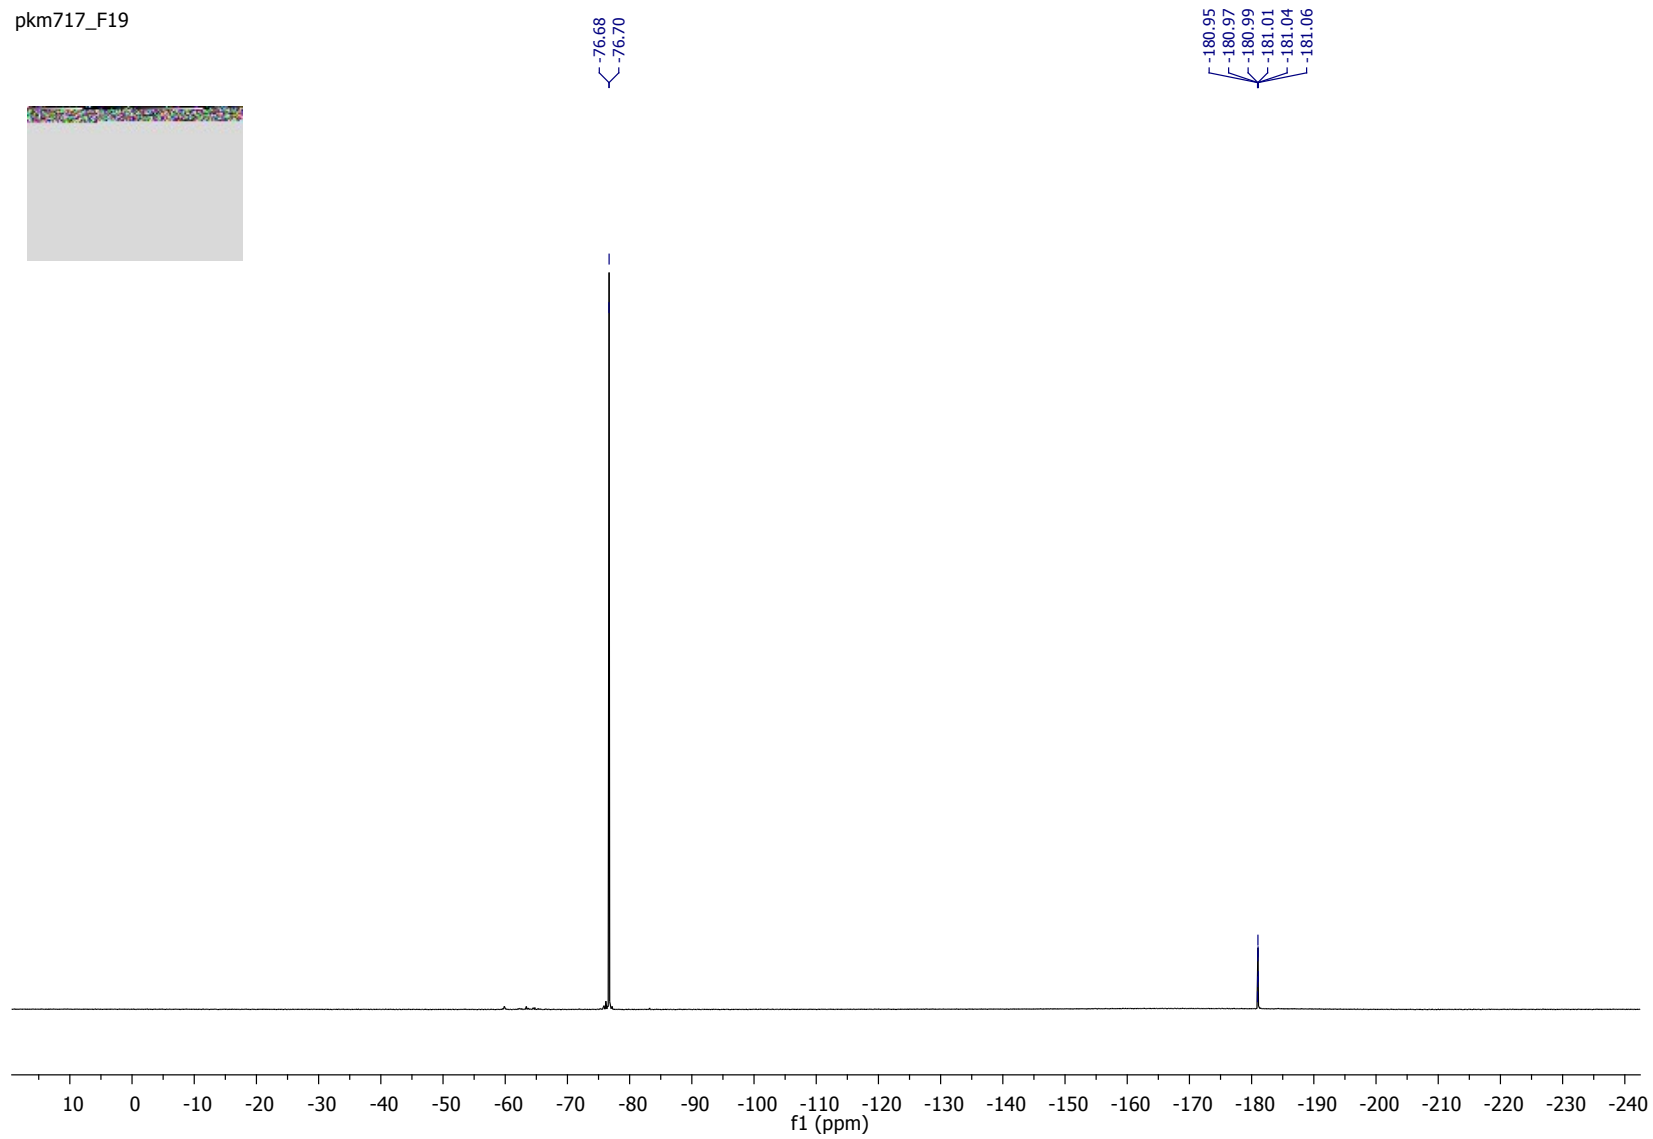

Compound 17a

pkm717\_C13

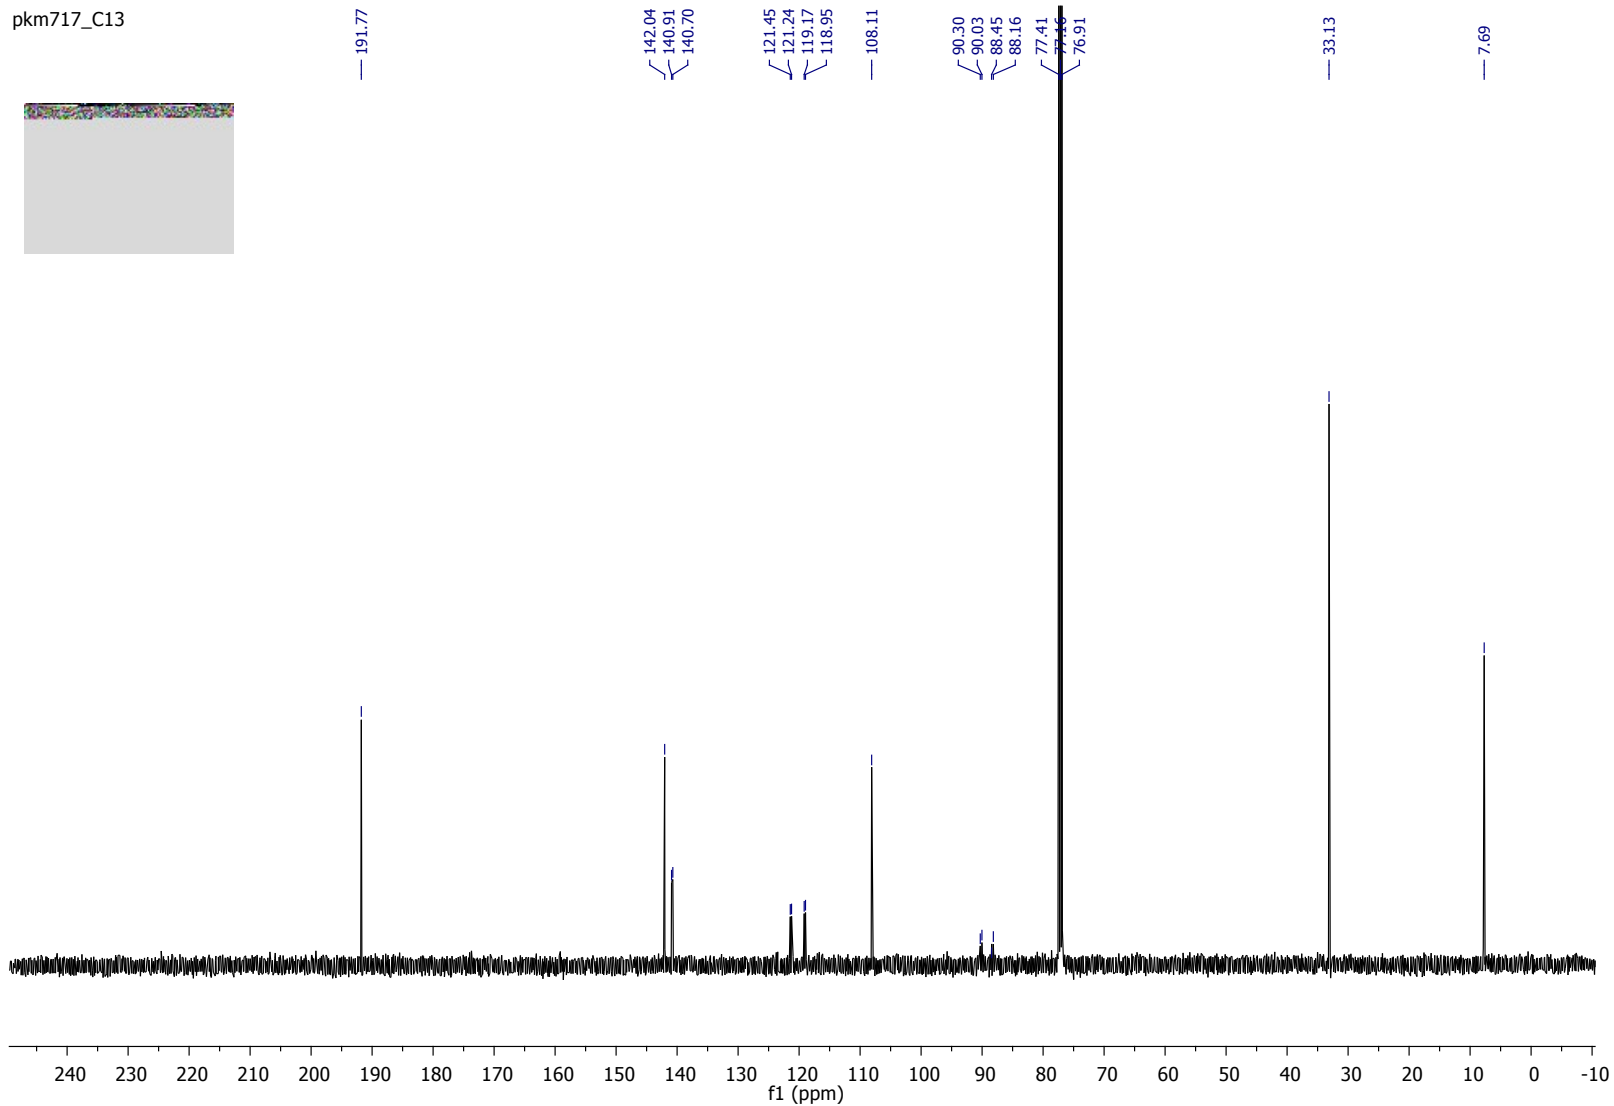

Compound 18a



pkm722

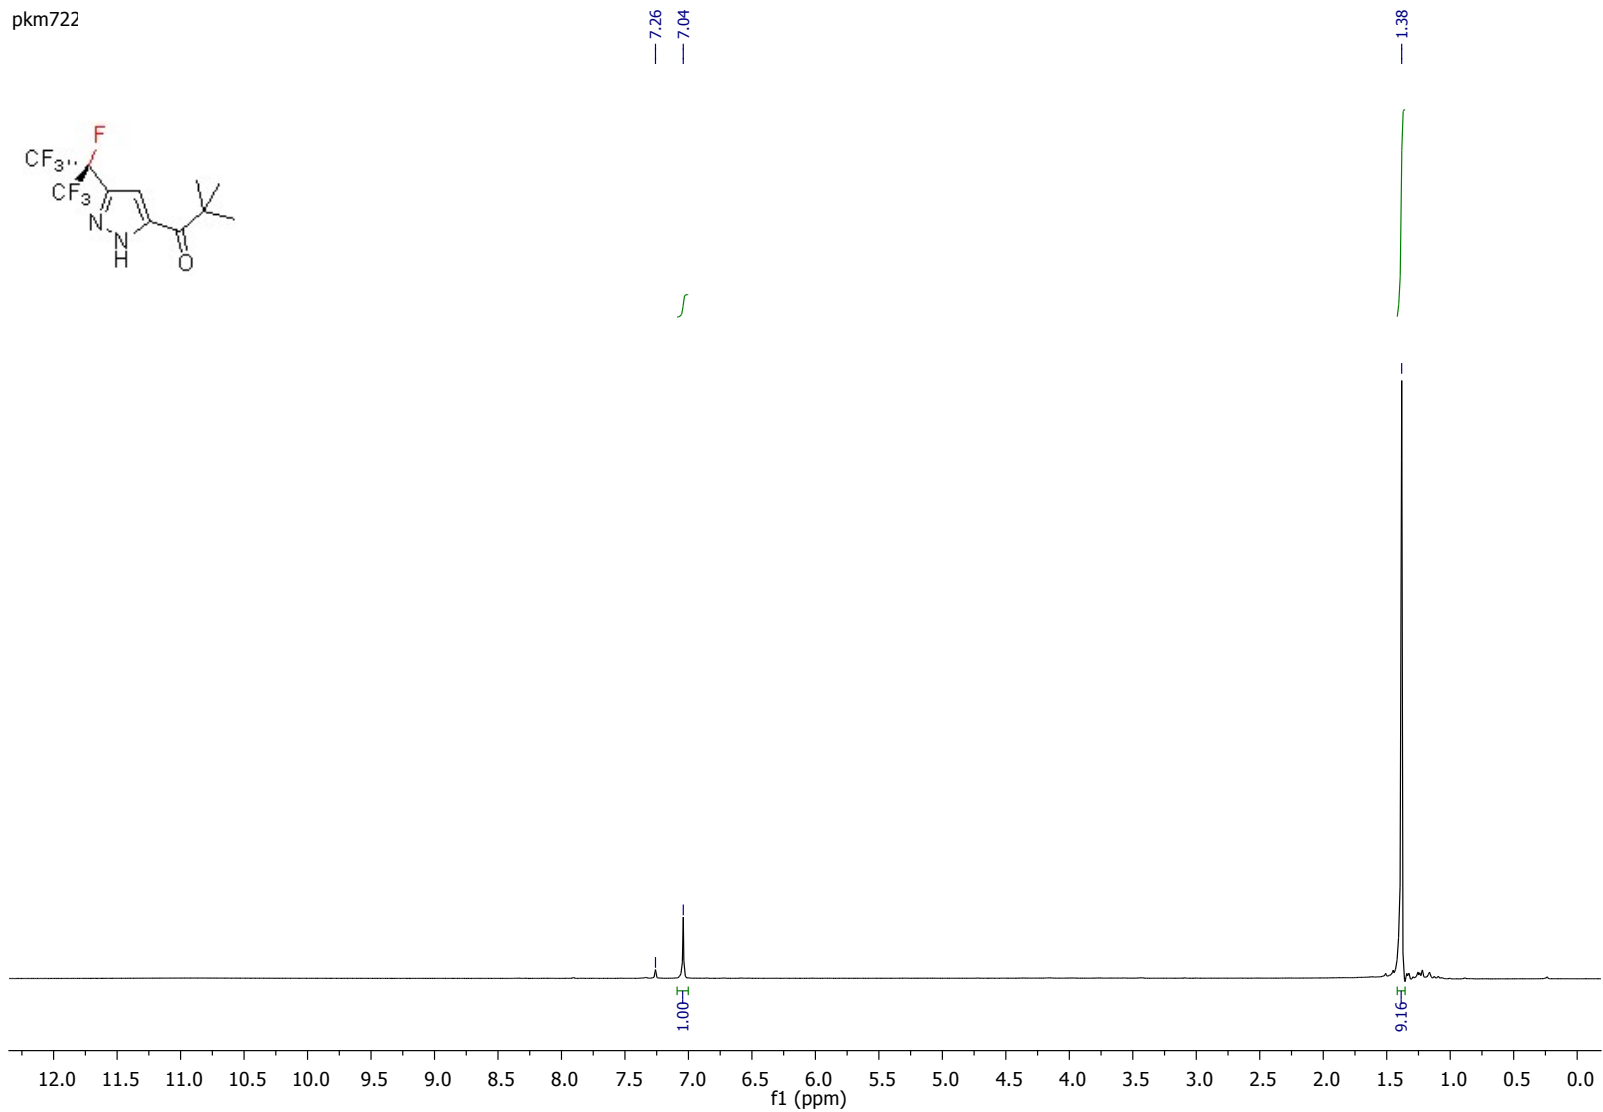

Compound **18a**

pkm722\_F19

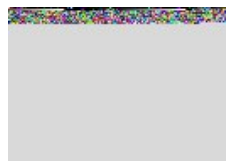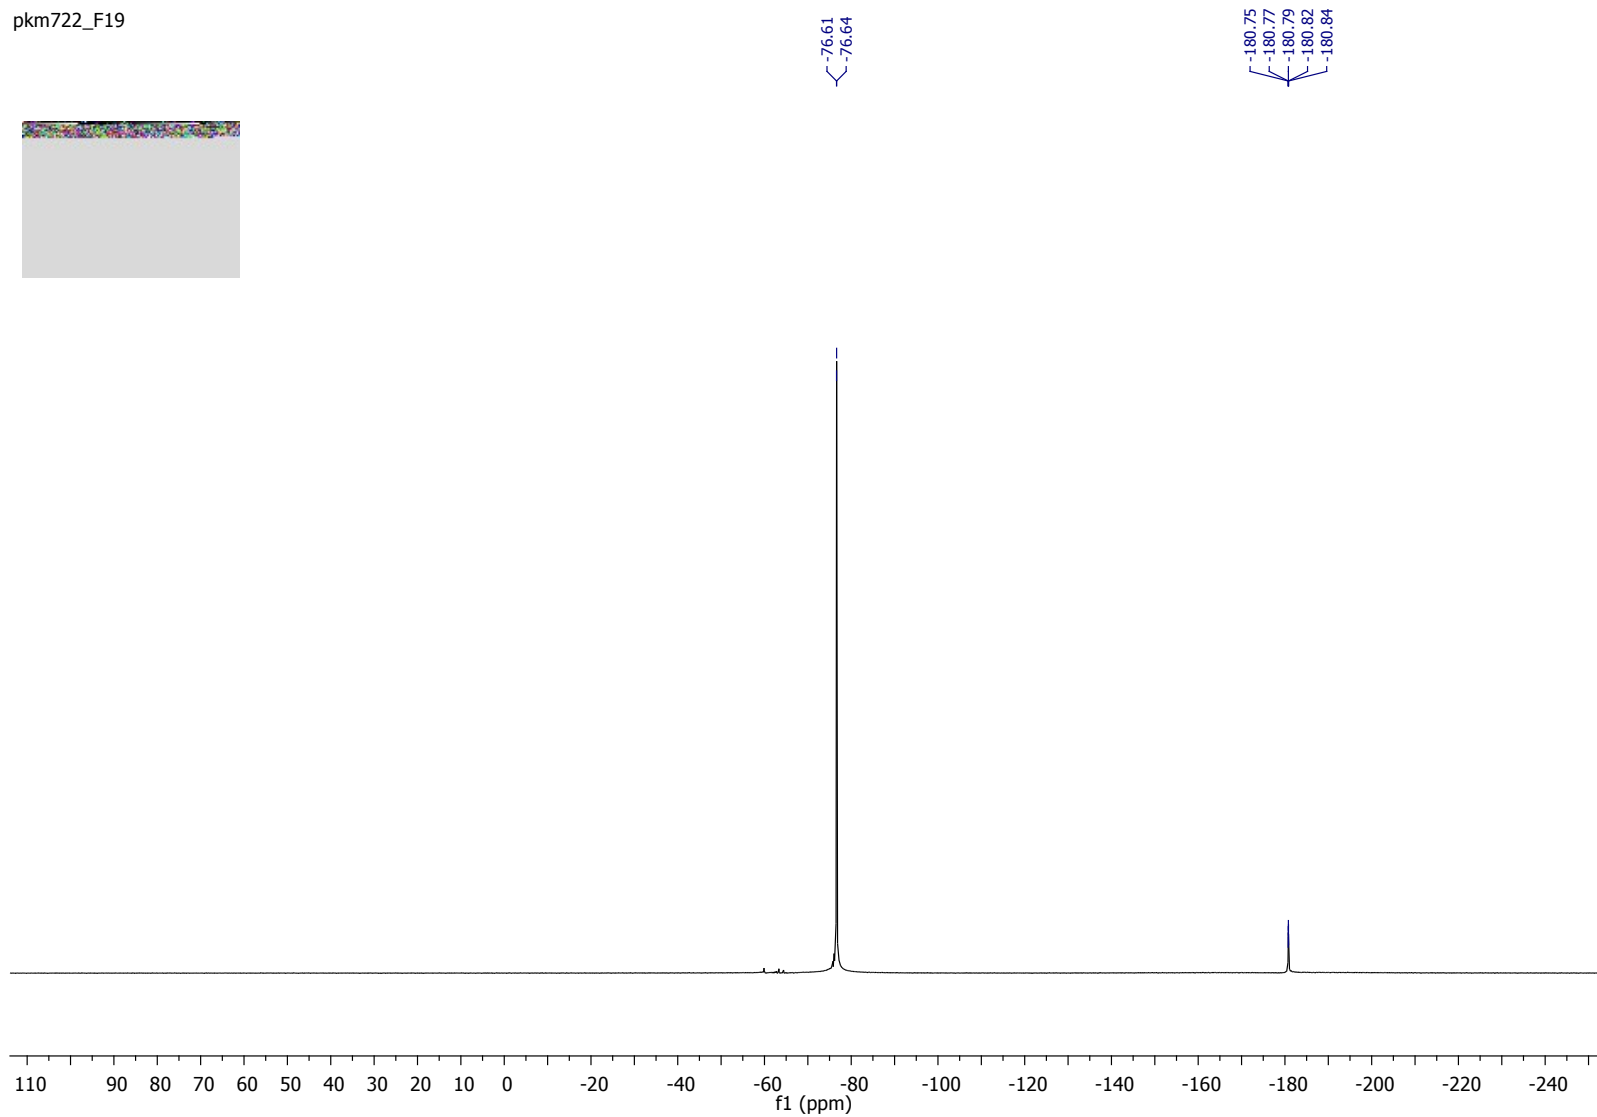

Compound **18a**

pkm722\_C13

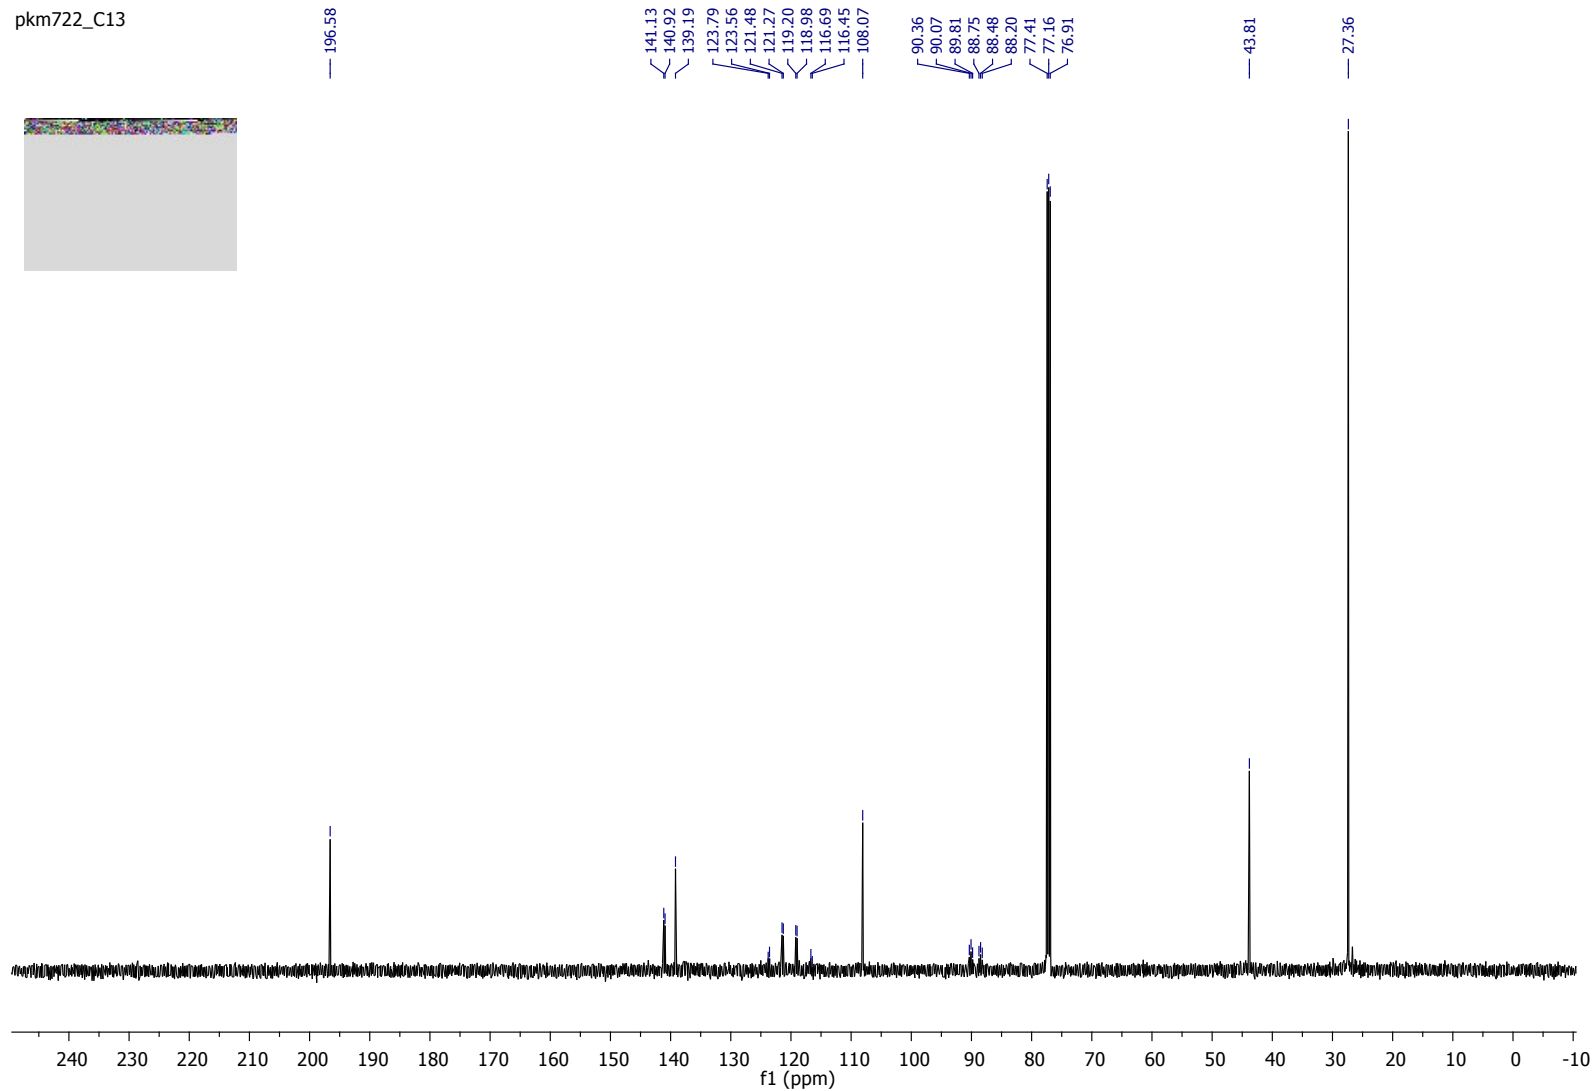

Compound 19a

pkm724

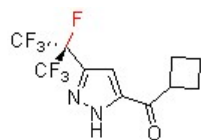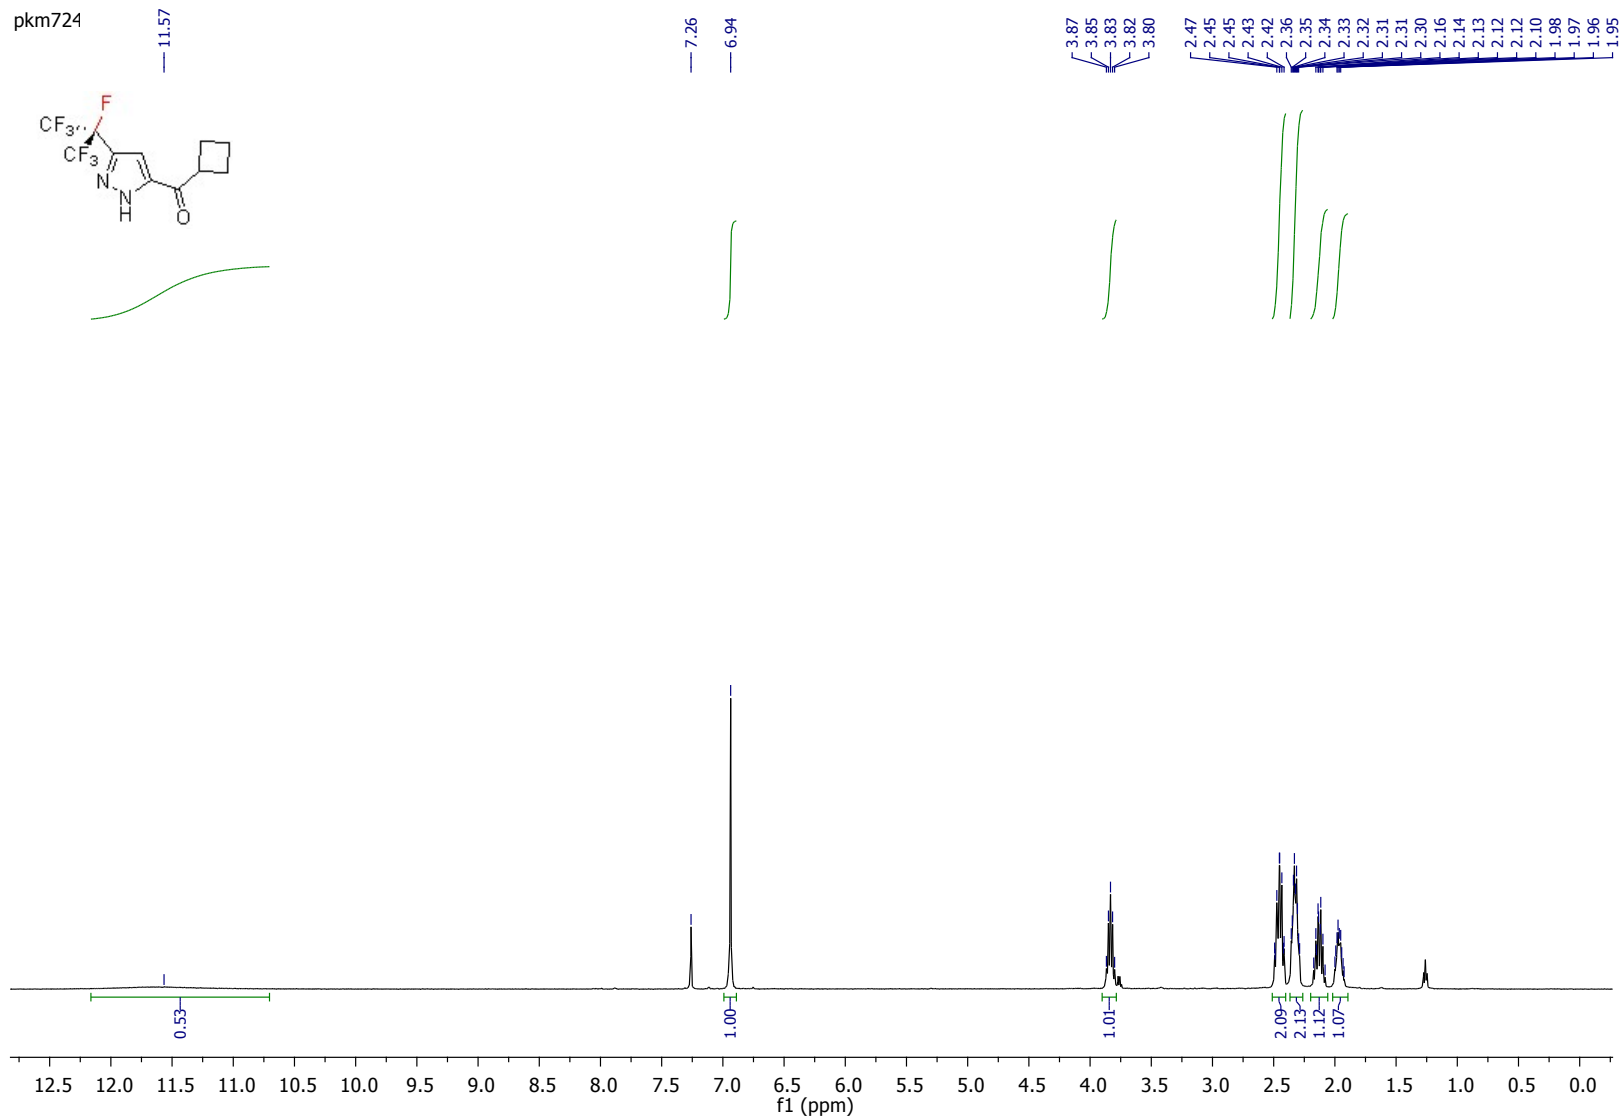

Compound 19a

pkm724\_F19

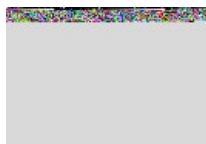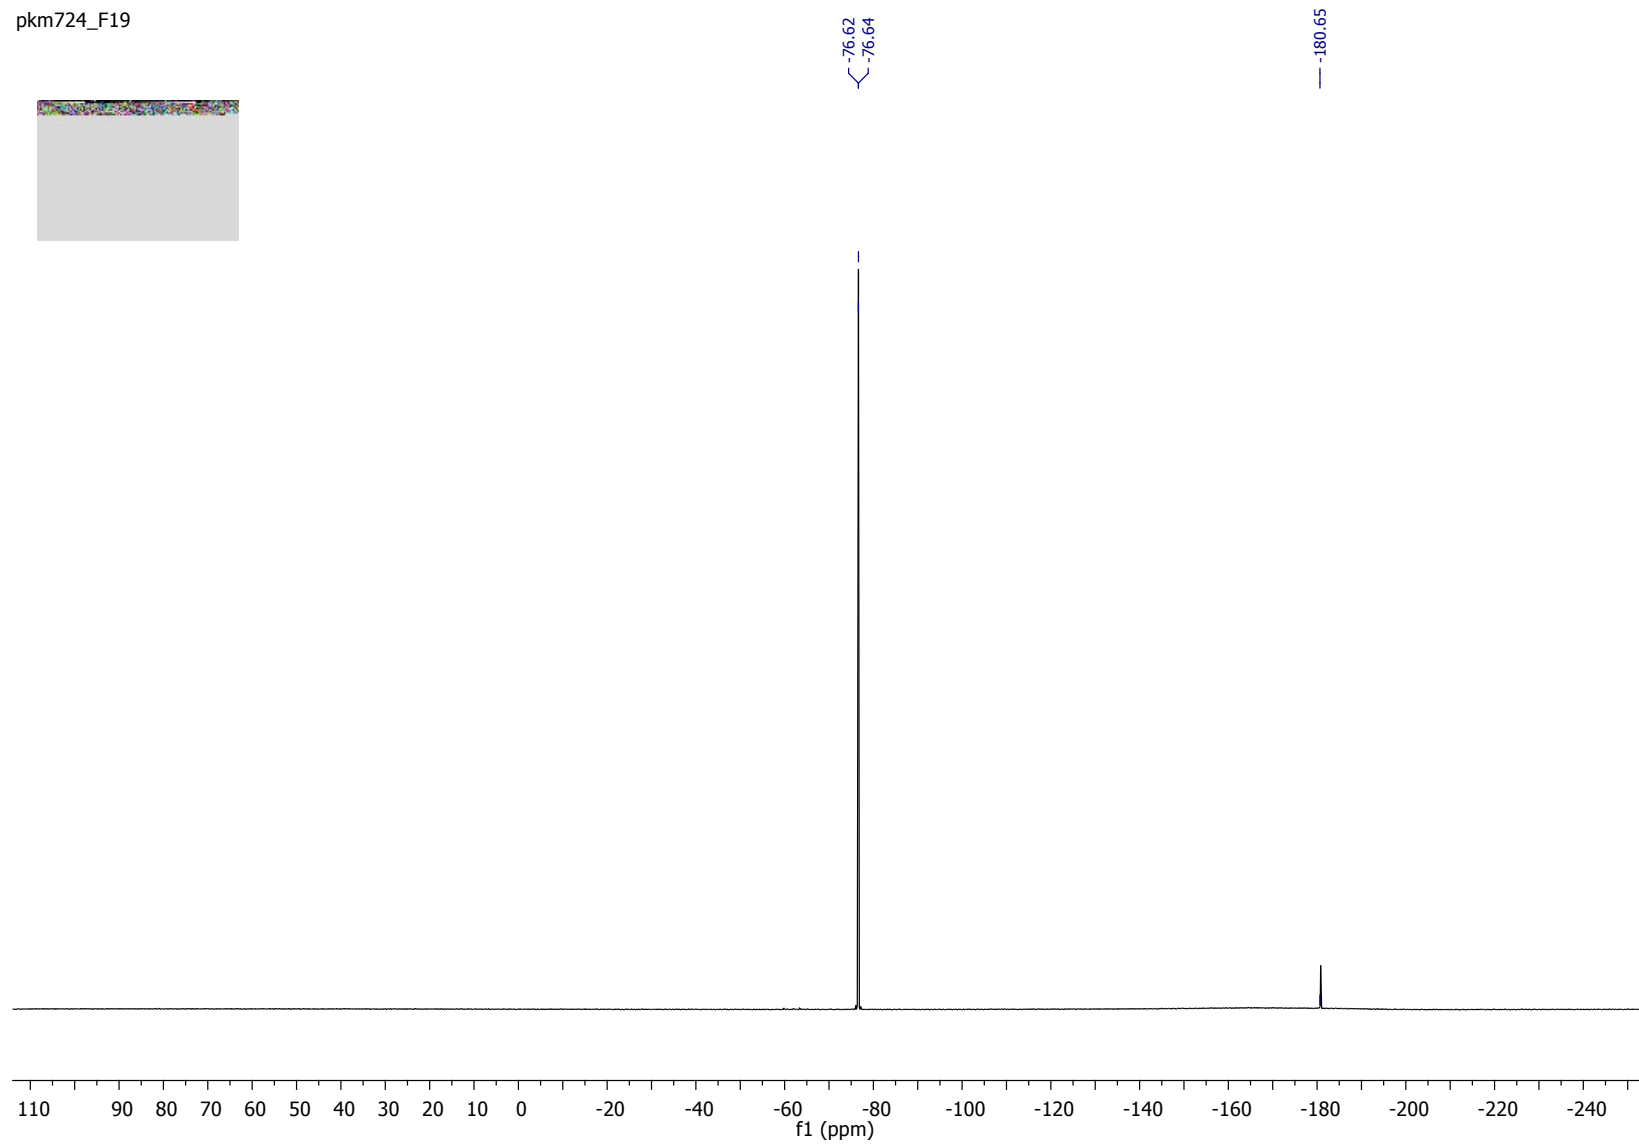

# Compound 19a

pkm724\_C13

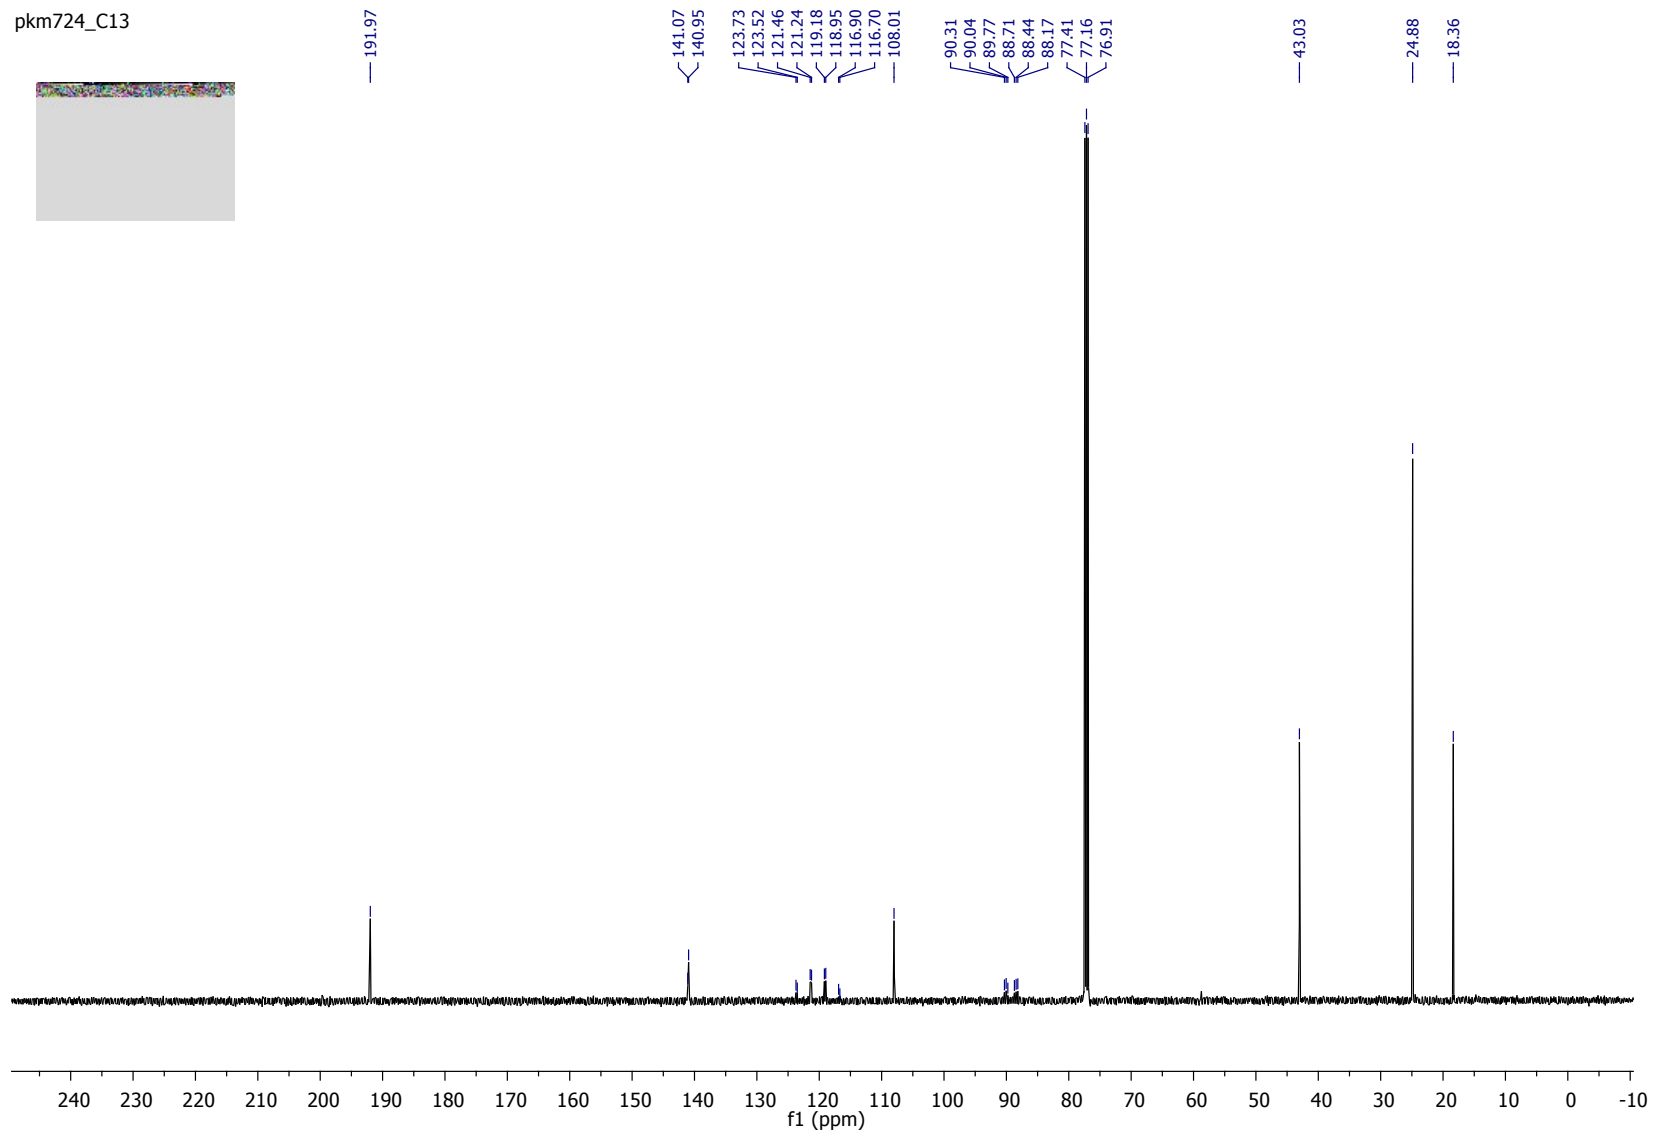

# Compound 20a

pkm721

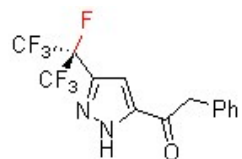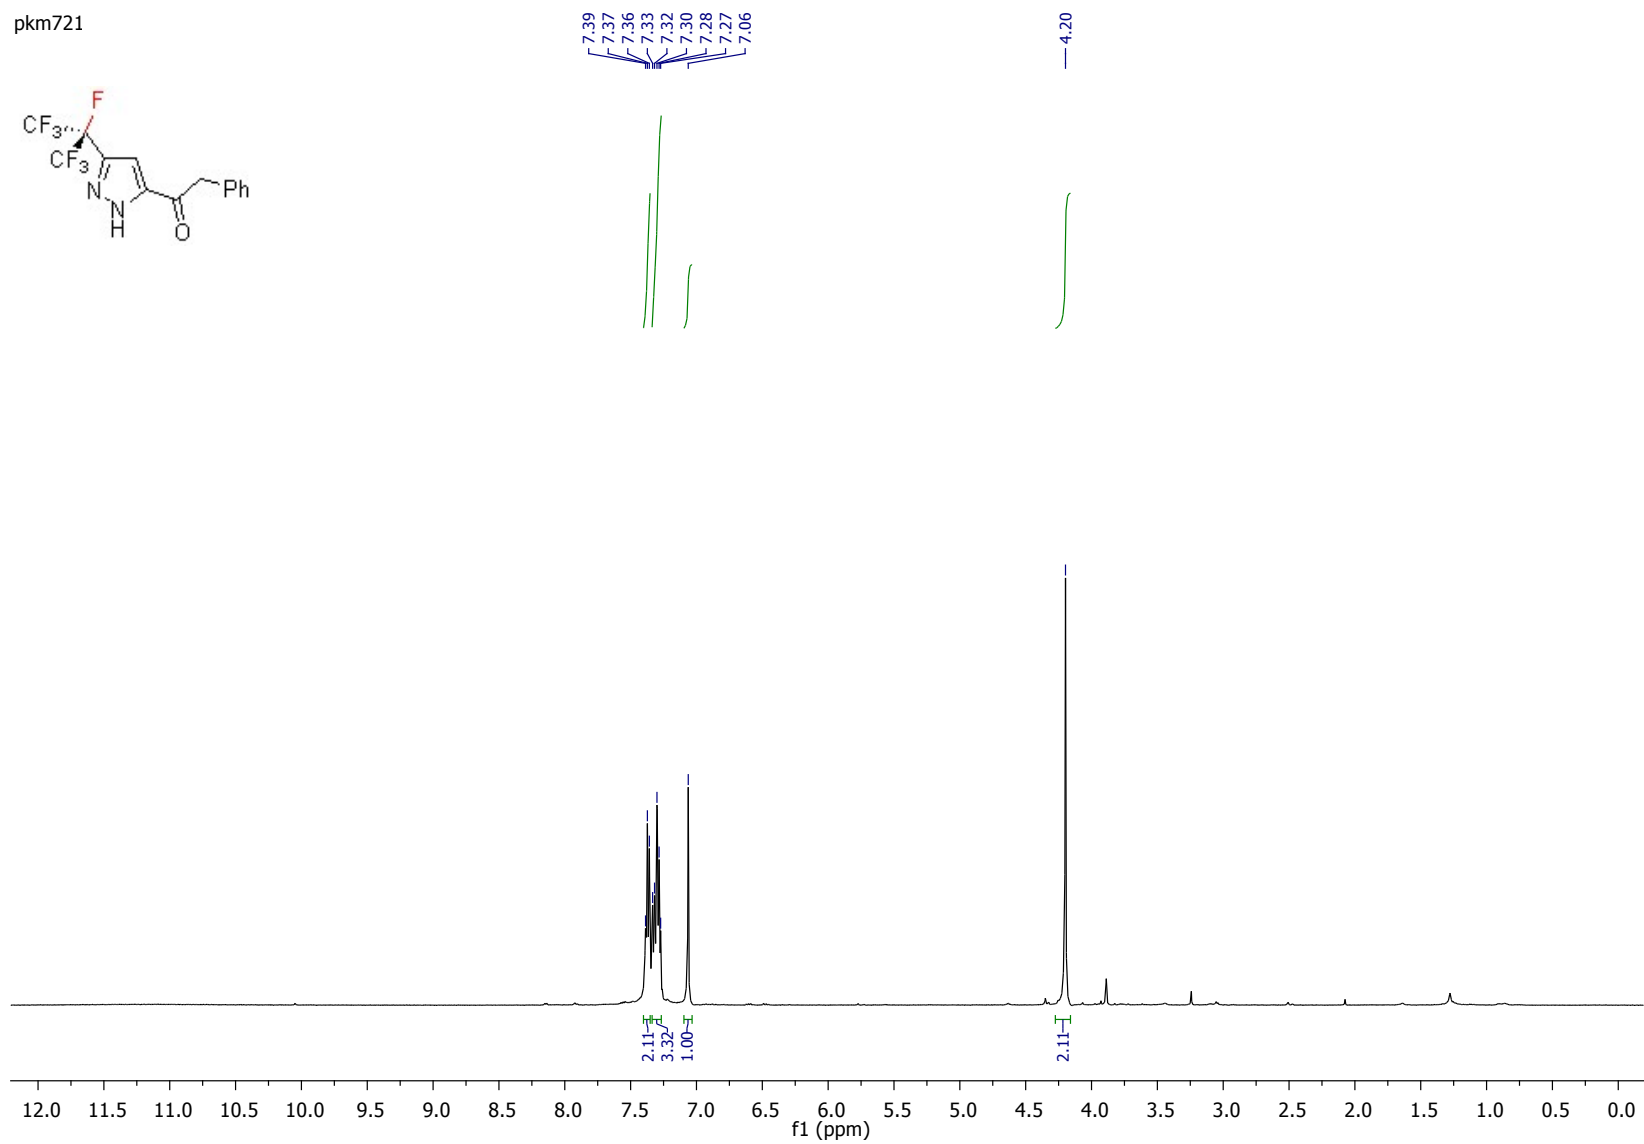

# Compound 20a

pkm721\_F19

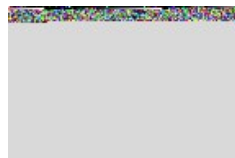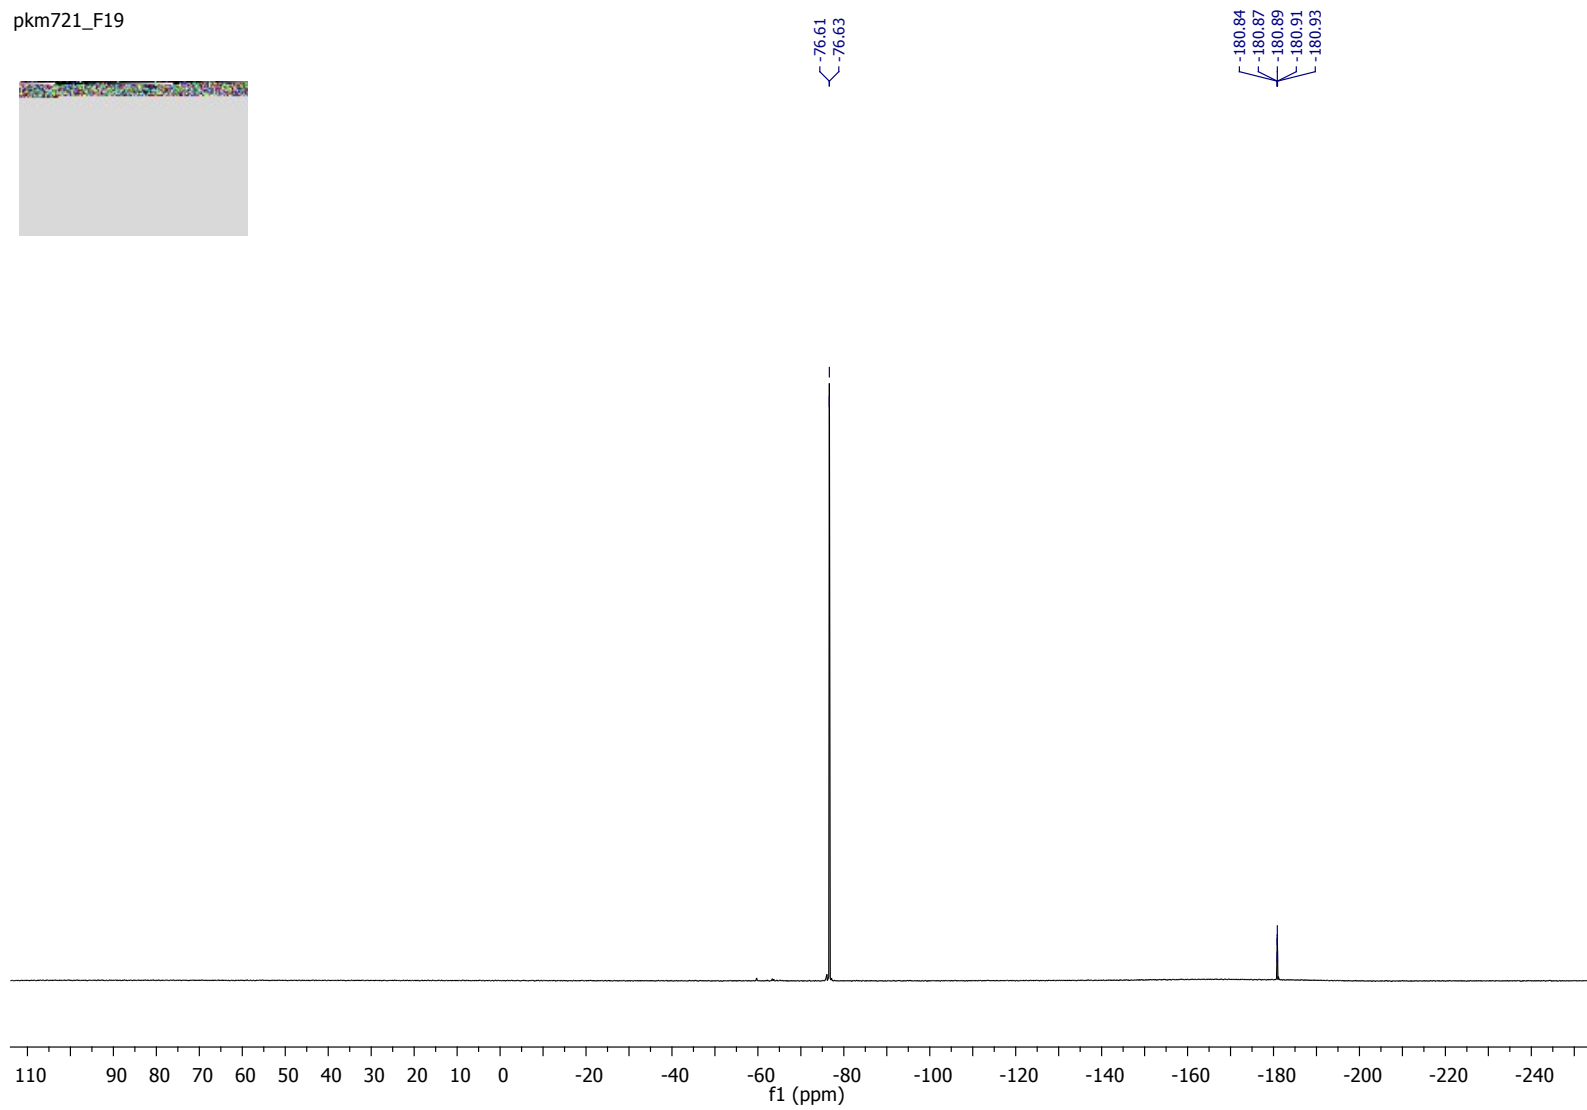



# Compound 20a

pkm721\_C13

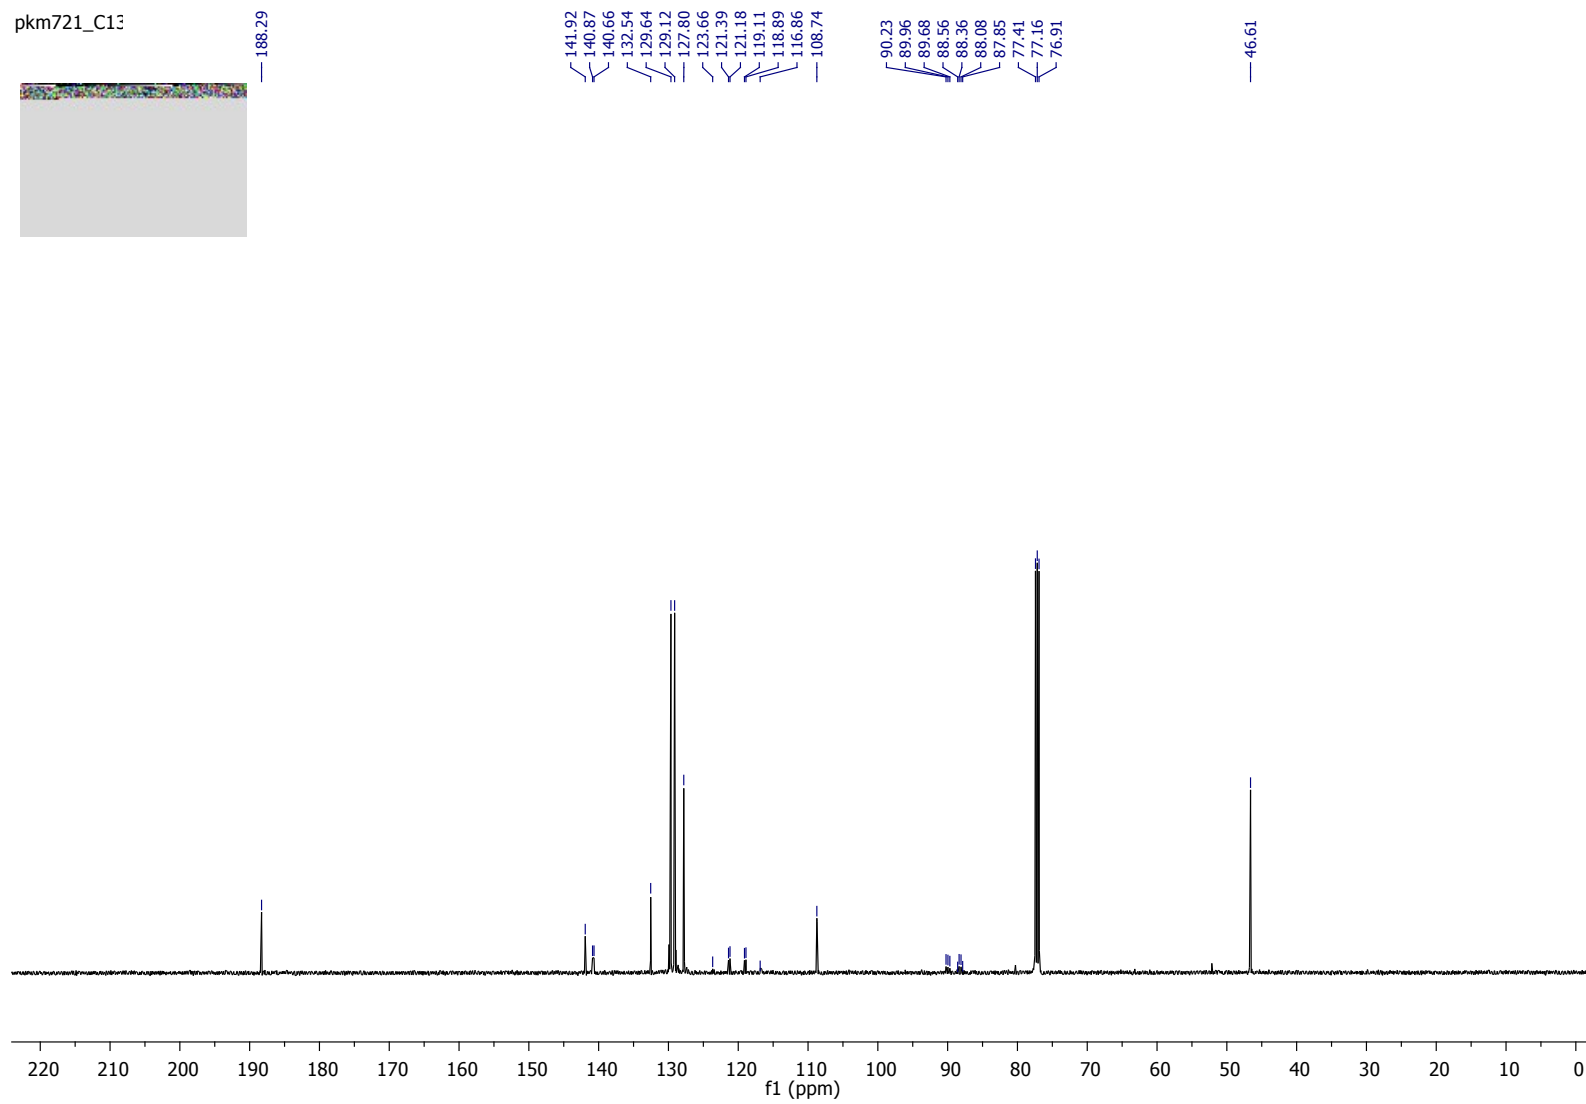

# Compound 21a

PF

7.318  
7.303  
7.259  
7.244

pkm723

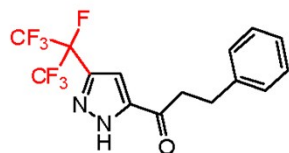

3.275  
3.260  
3.252  
3.245

PPM  
3.117  
3.102  
3.087

PPM  
3.10

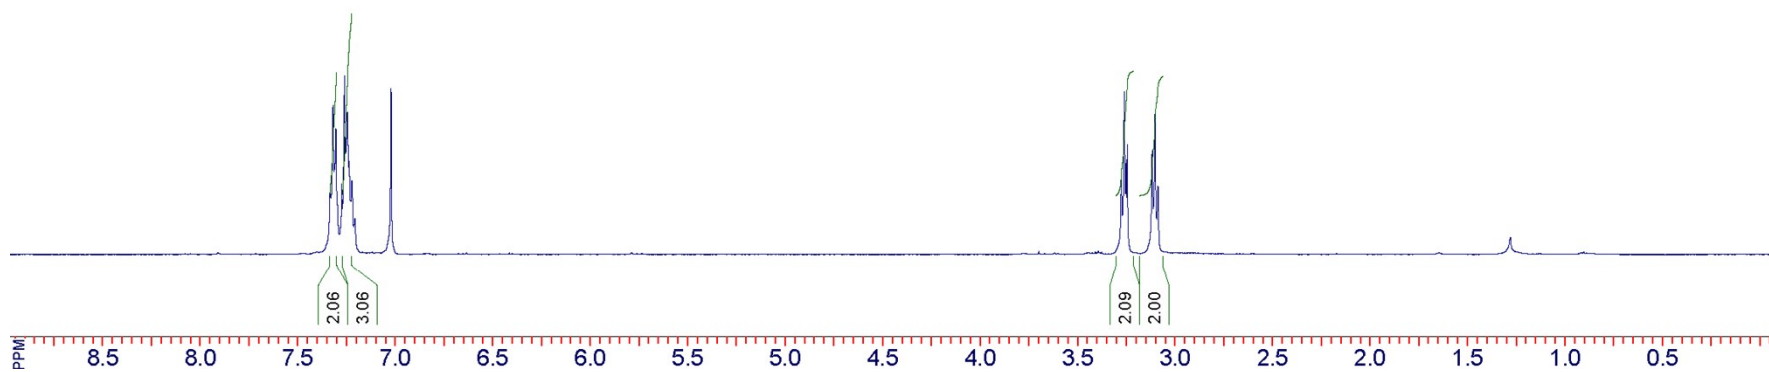

# Compound 21a

pkm720\_F19

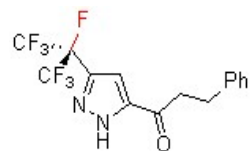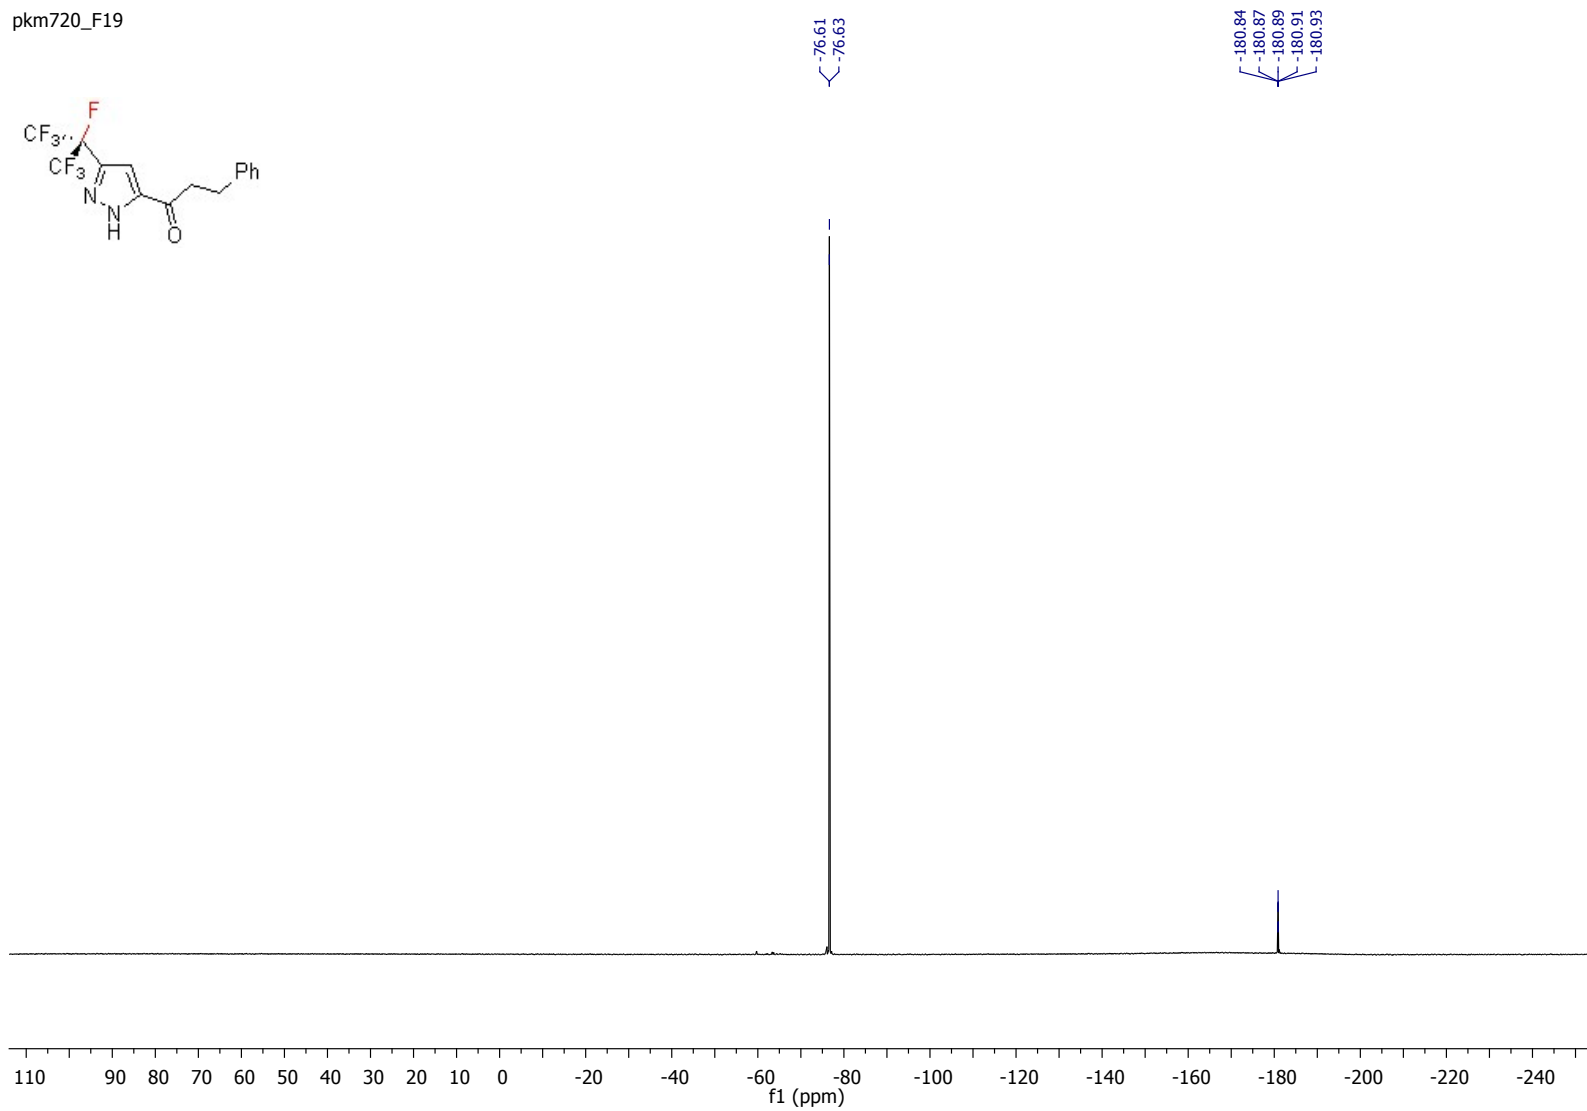

# Compound 22a

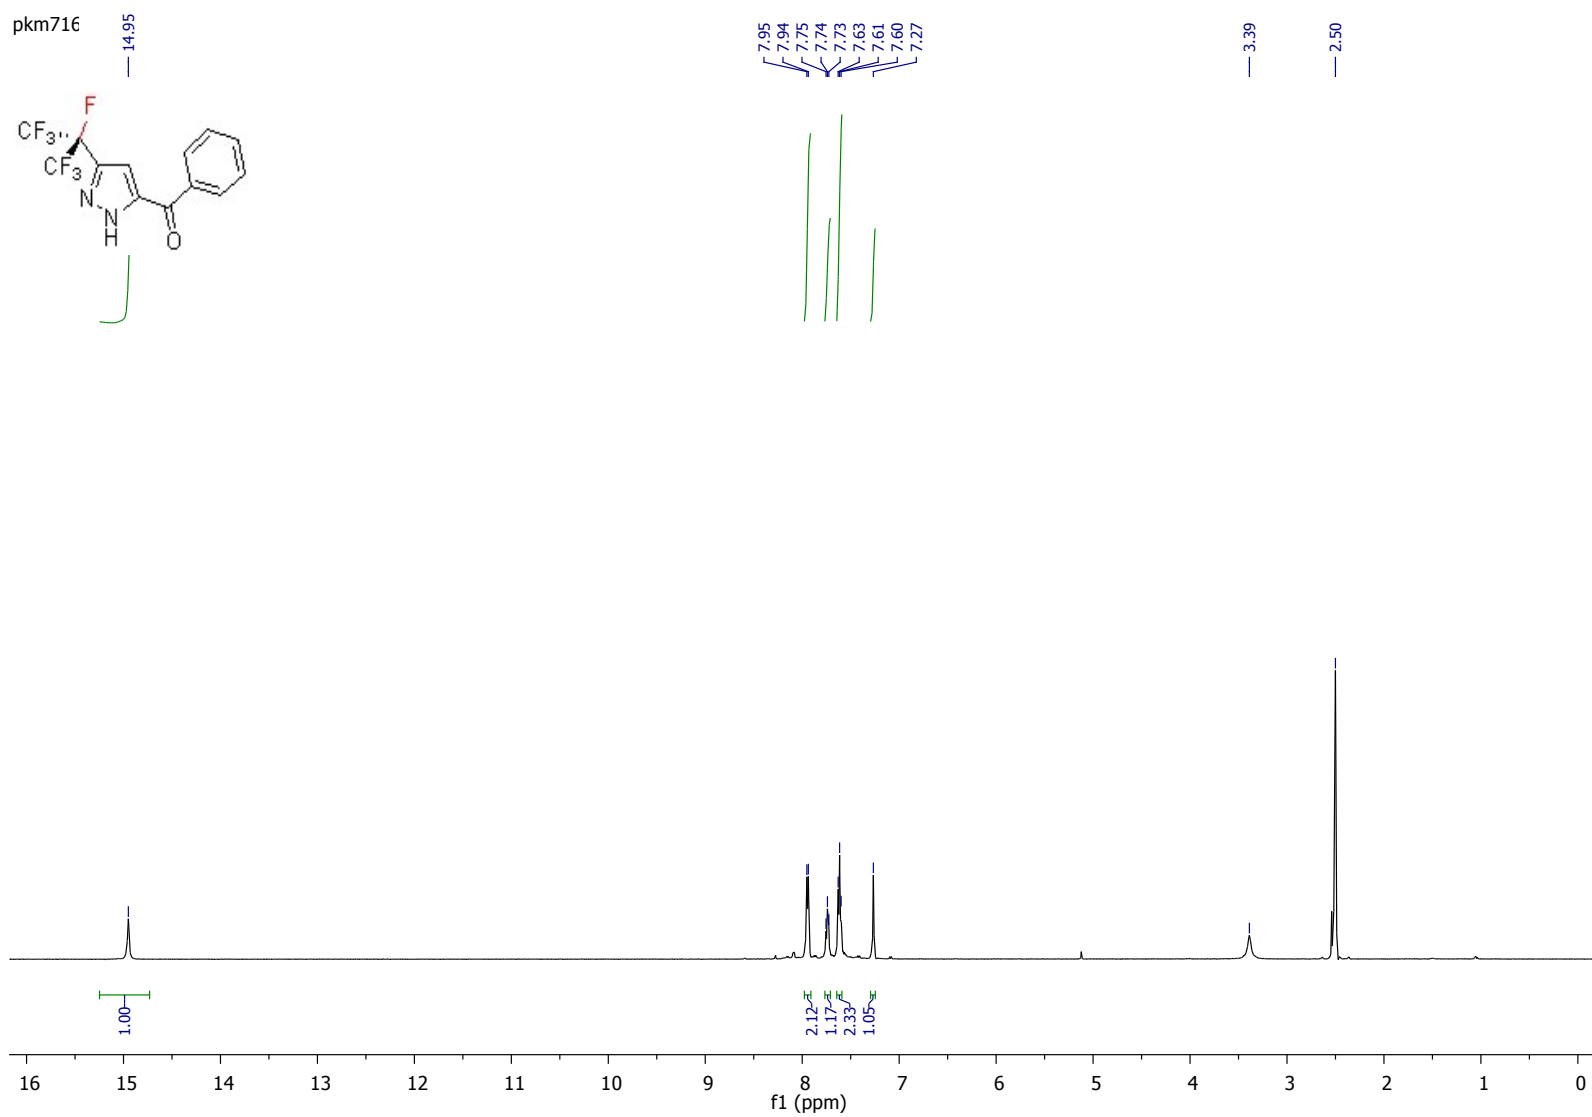

# Compound 22a

pkm716\_F19

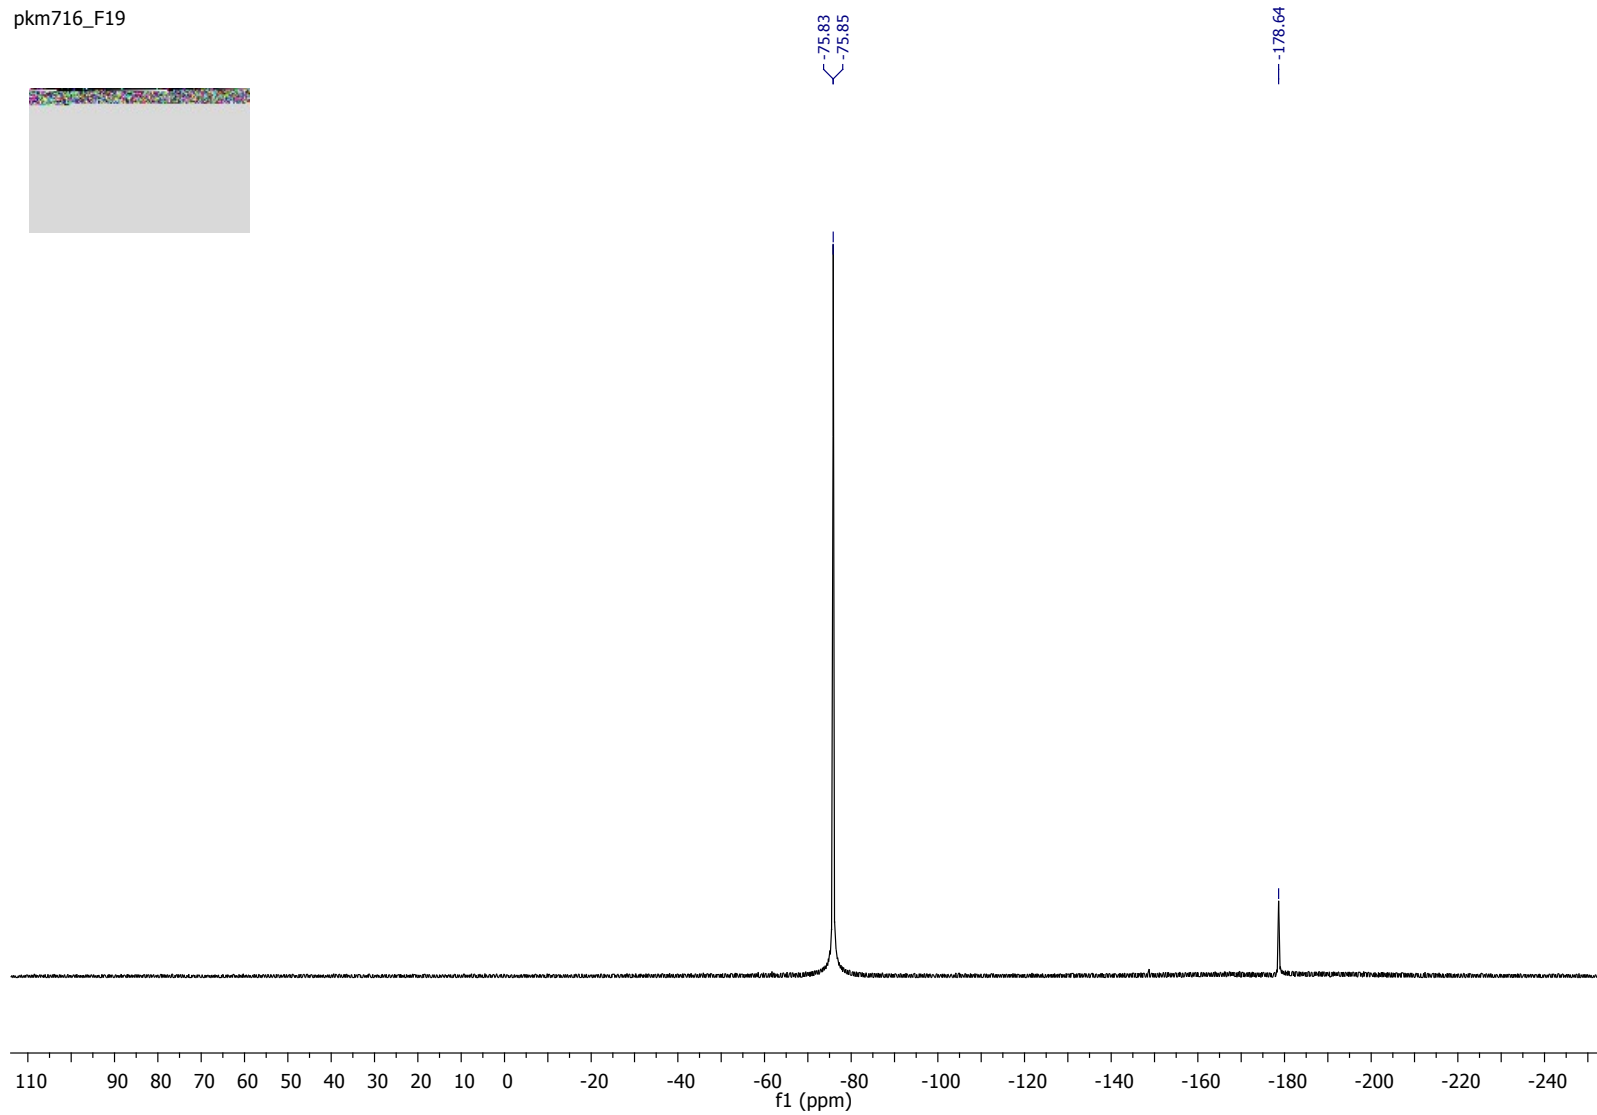

# Compound 22a

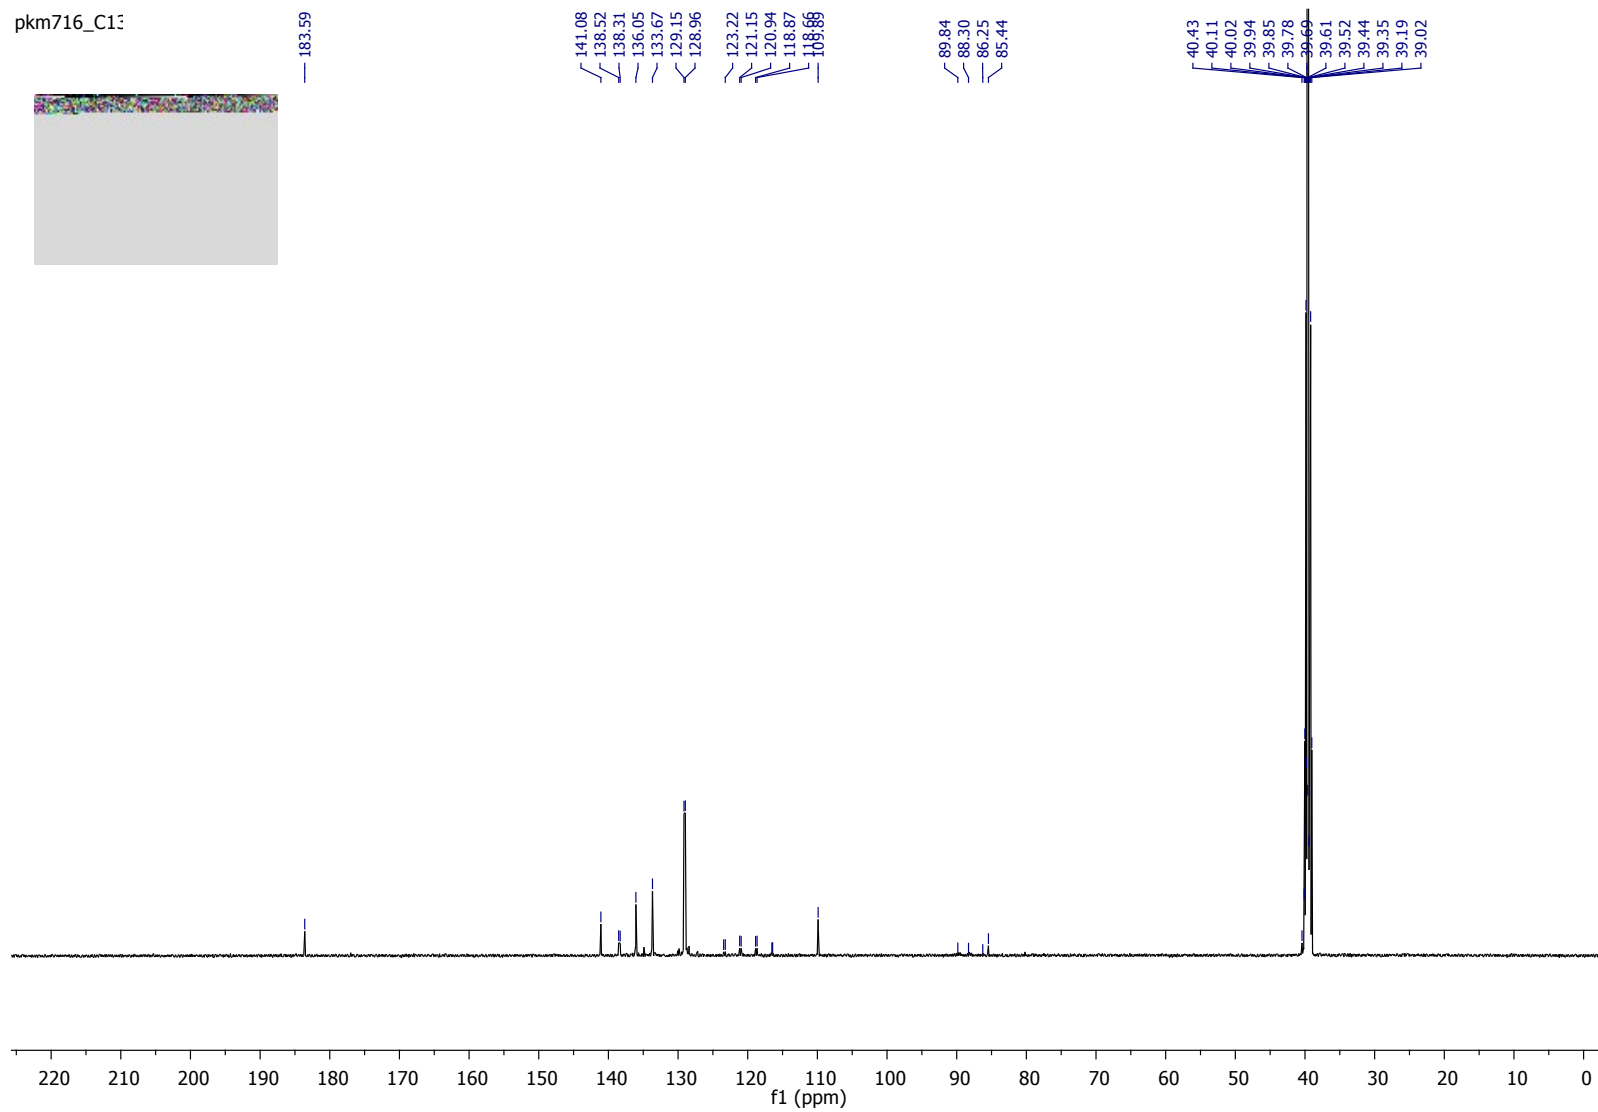

# Compound 23a

PPM

pkm720

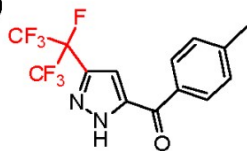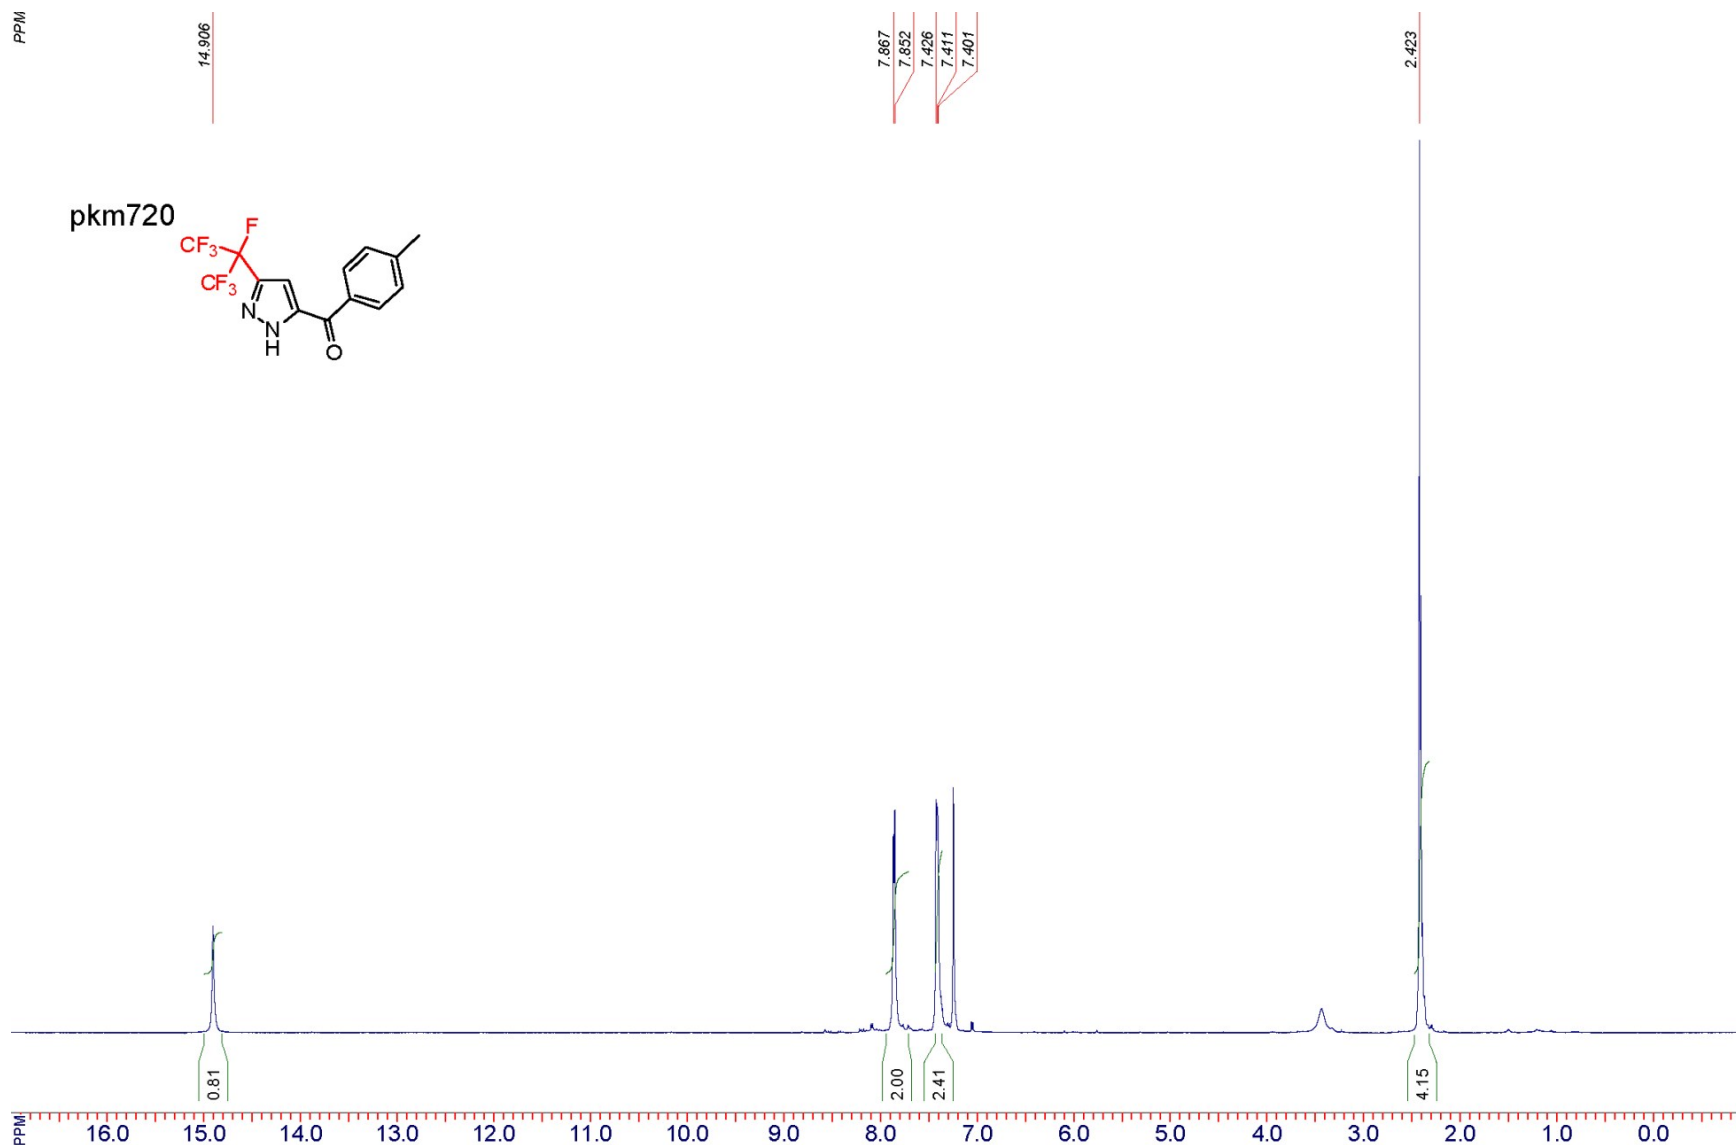

# Compound 23a

pkm720\_F19

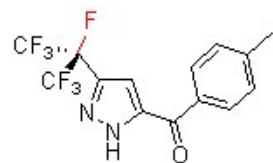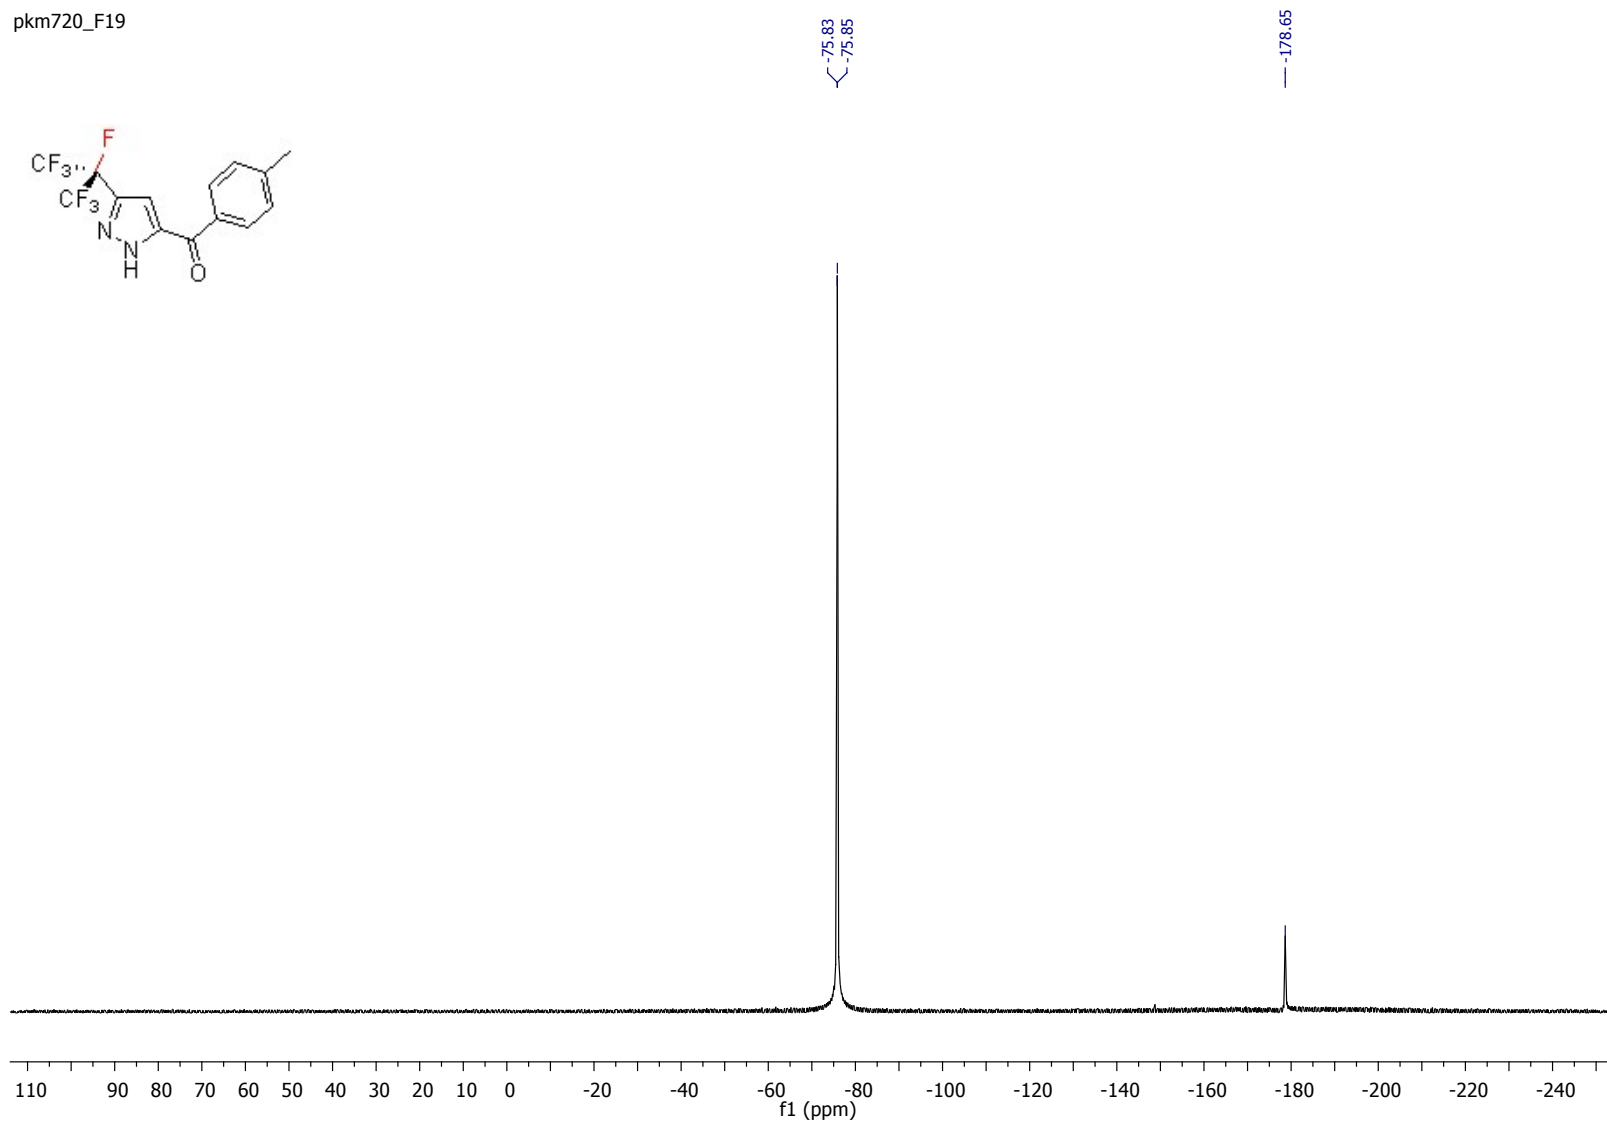



Compound 23a

pkm720\_C13

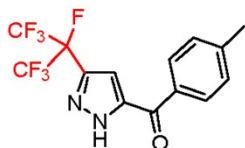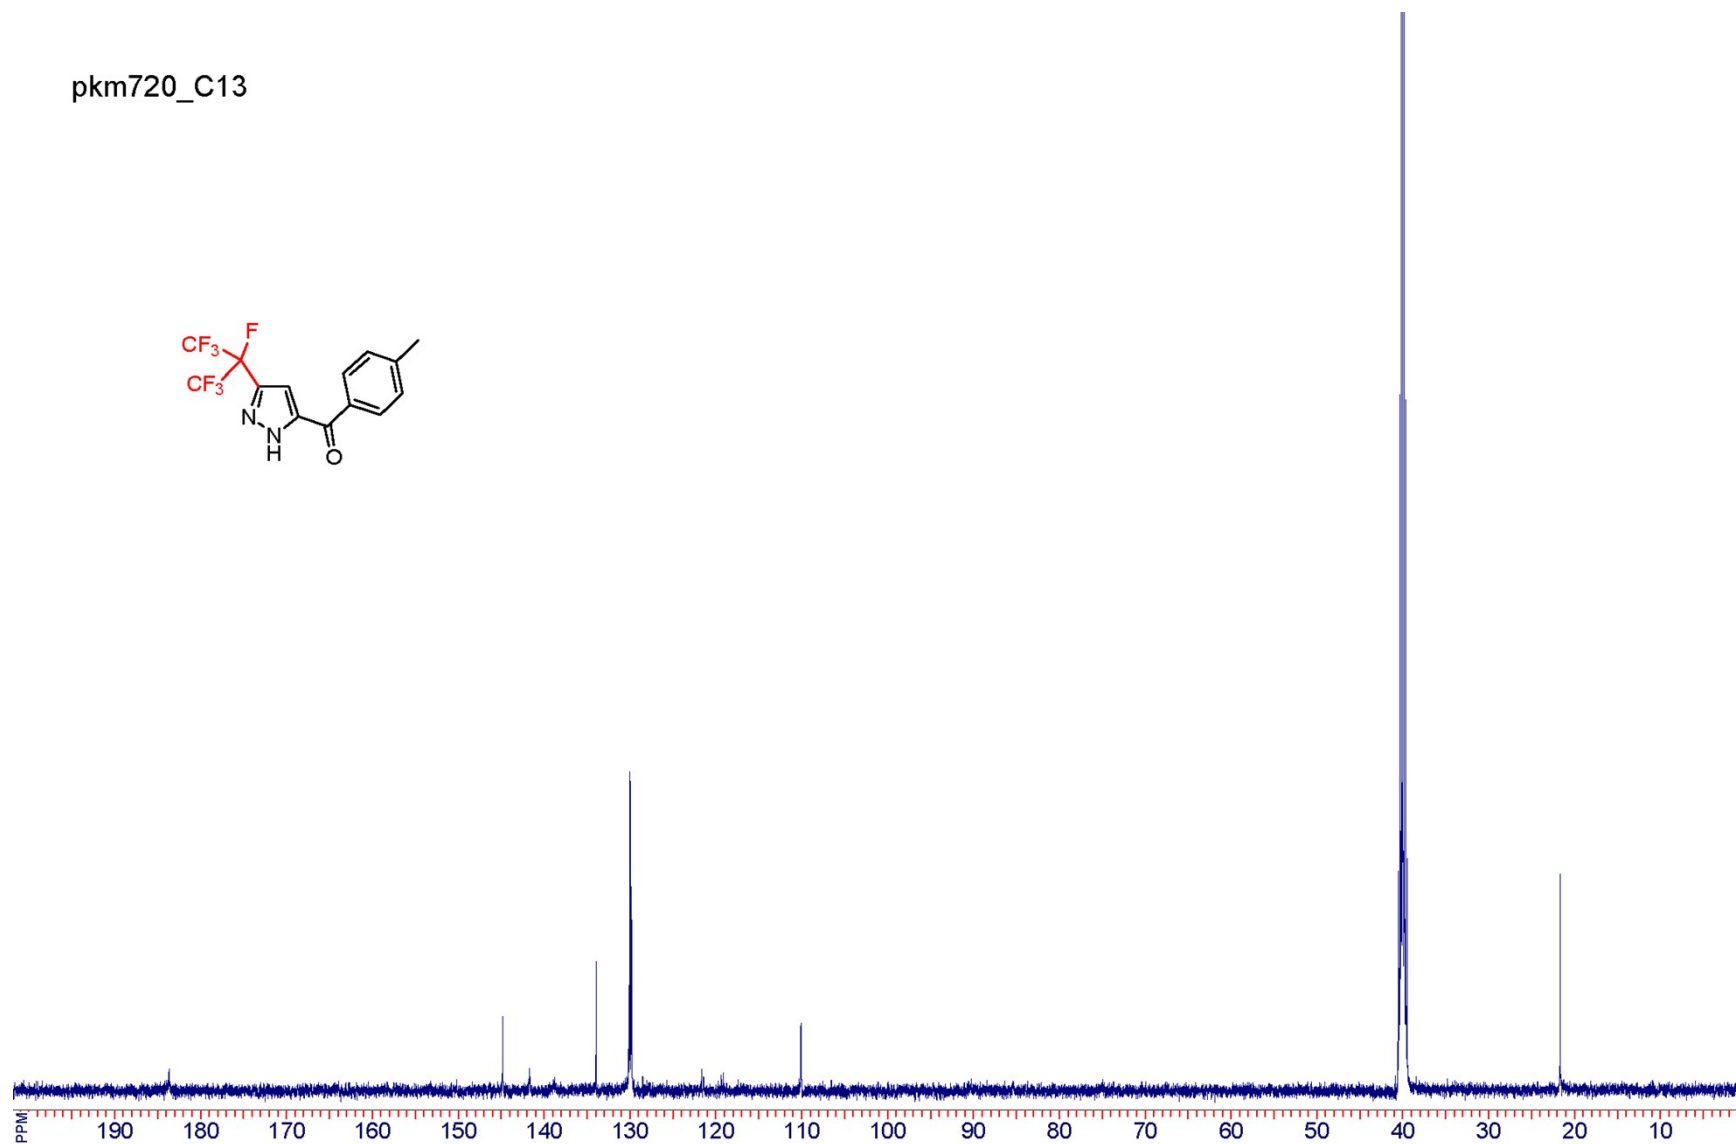

# Compound 24a

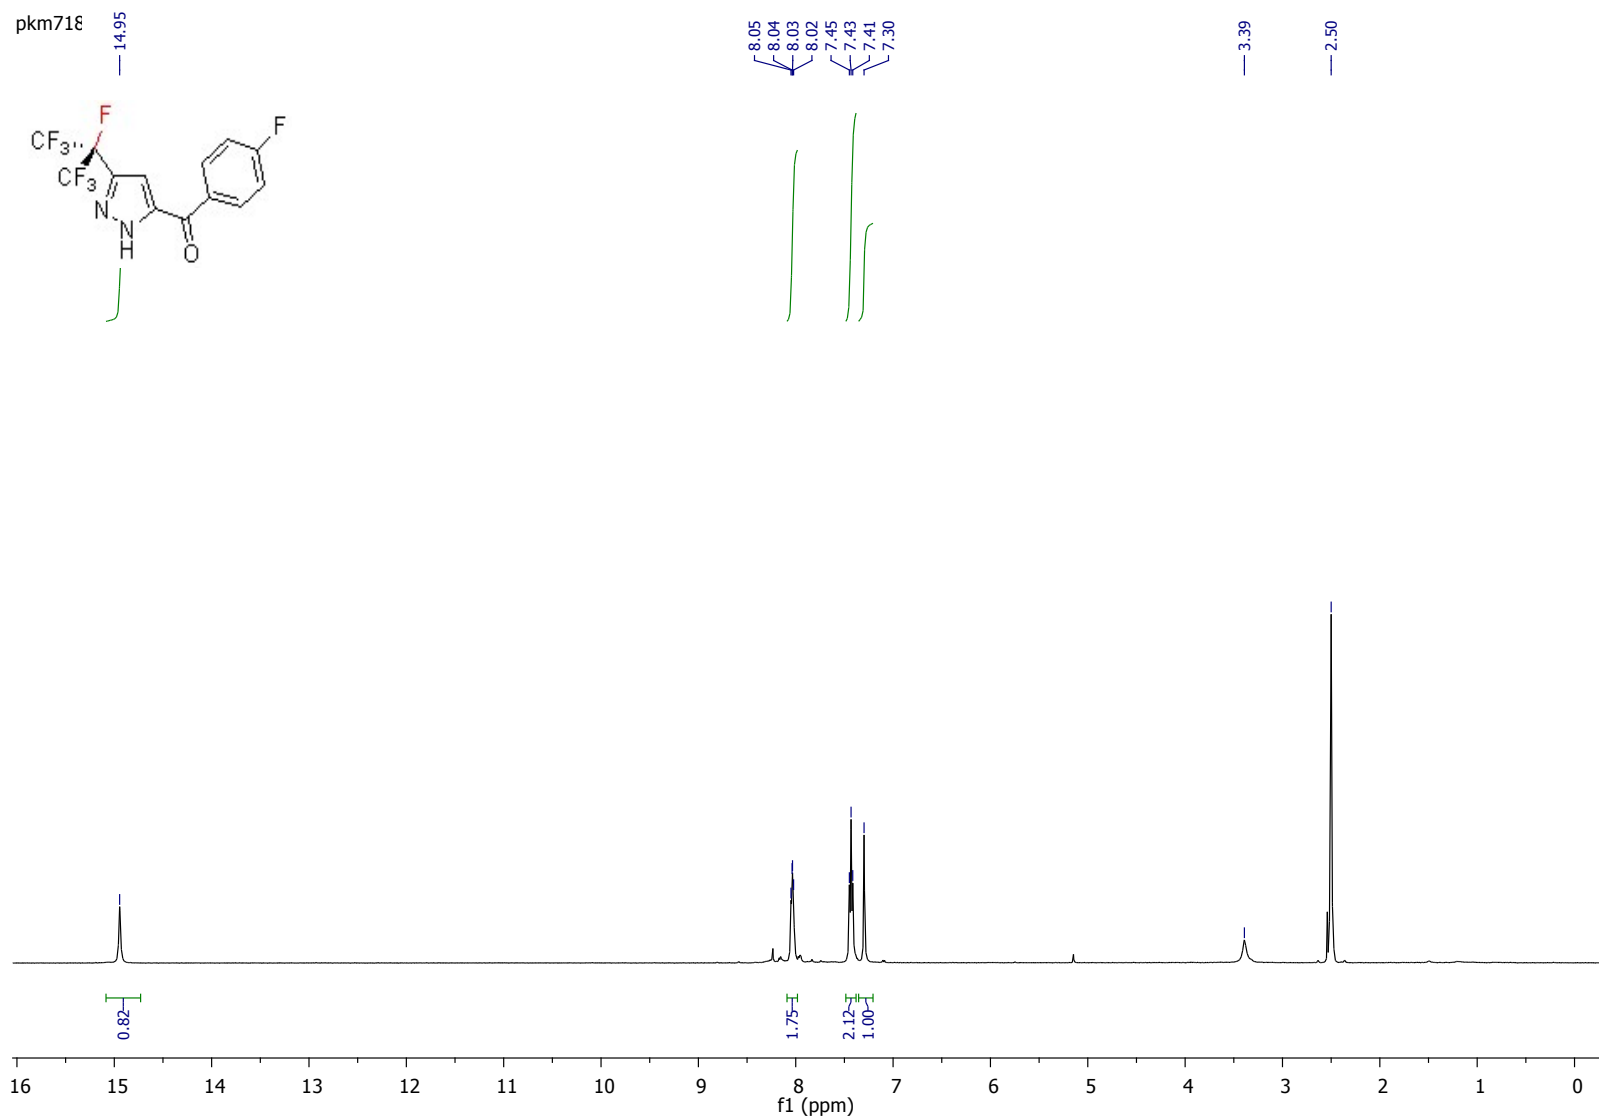

# Compound 24a

pkm718\_F19

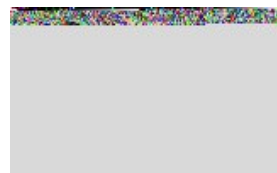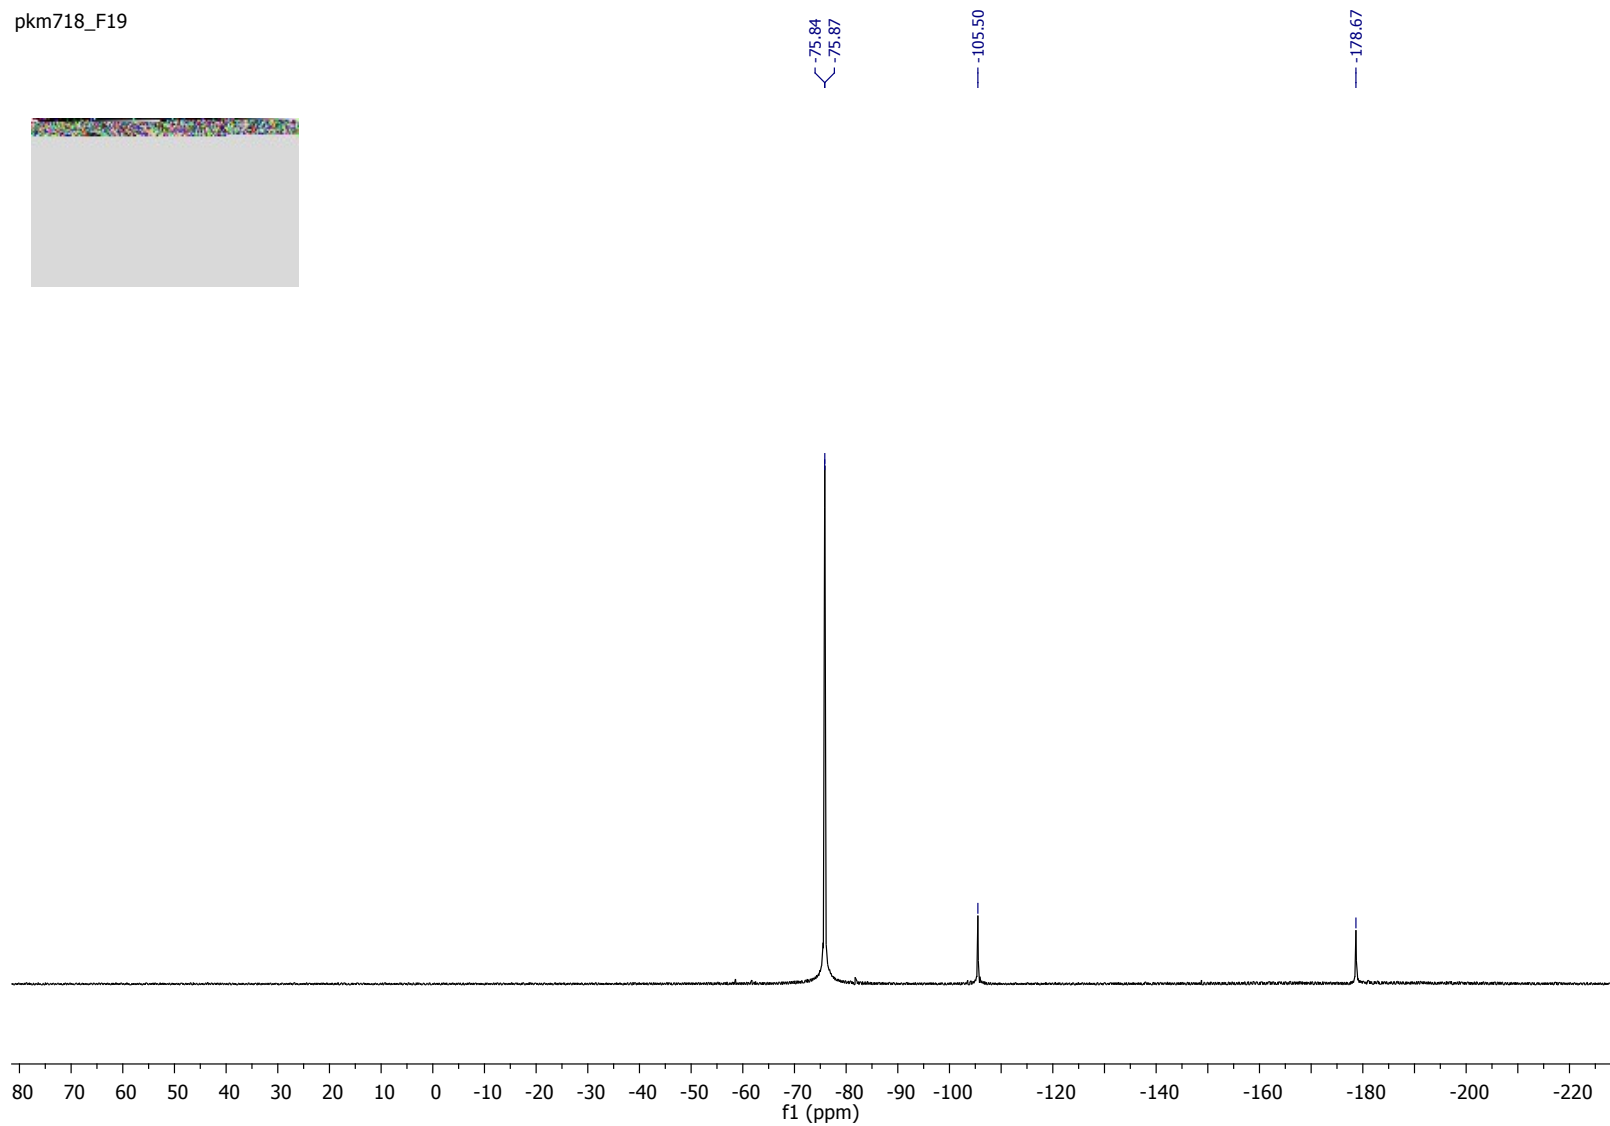

# Compound 24a

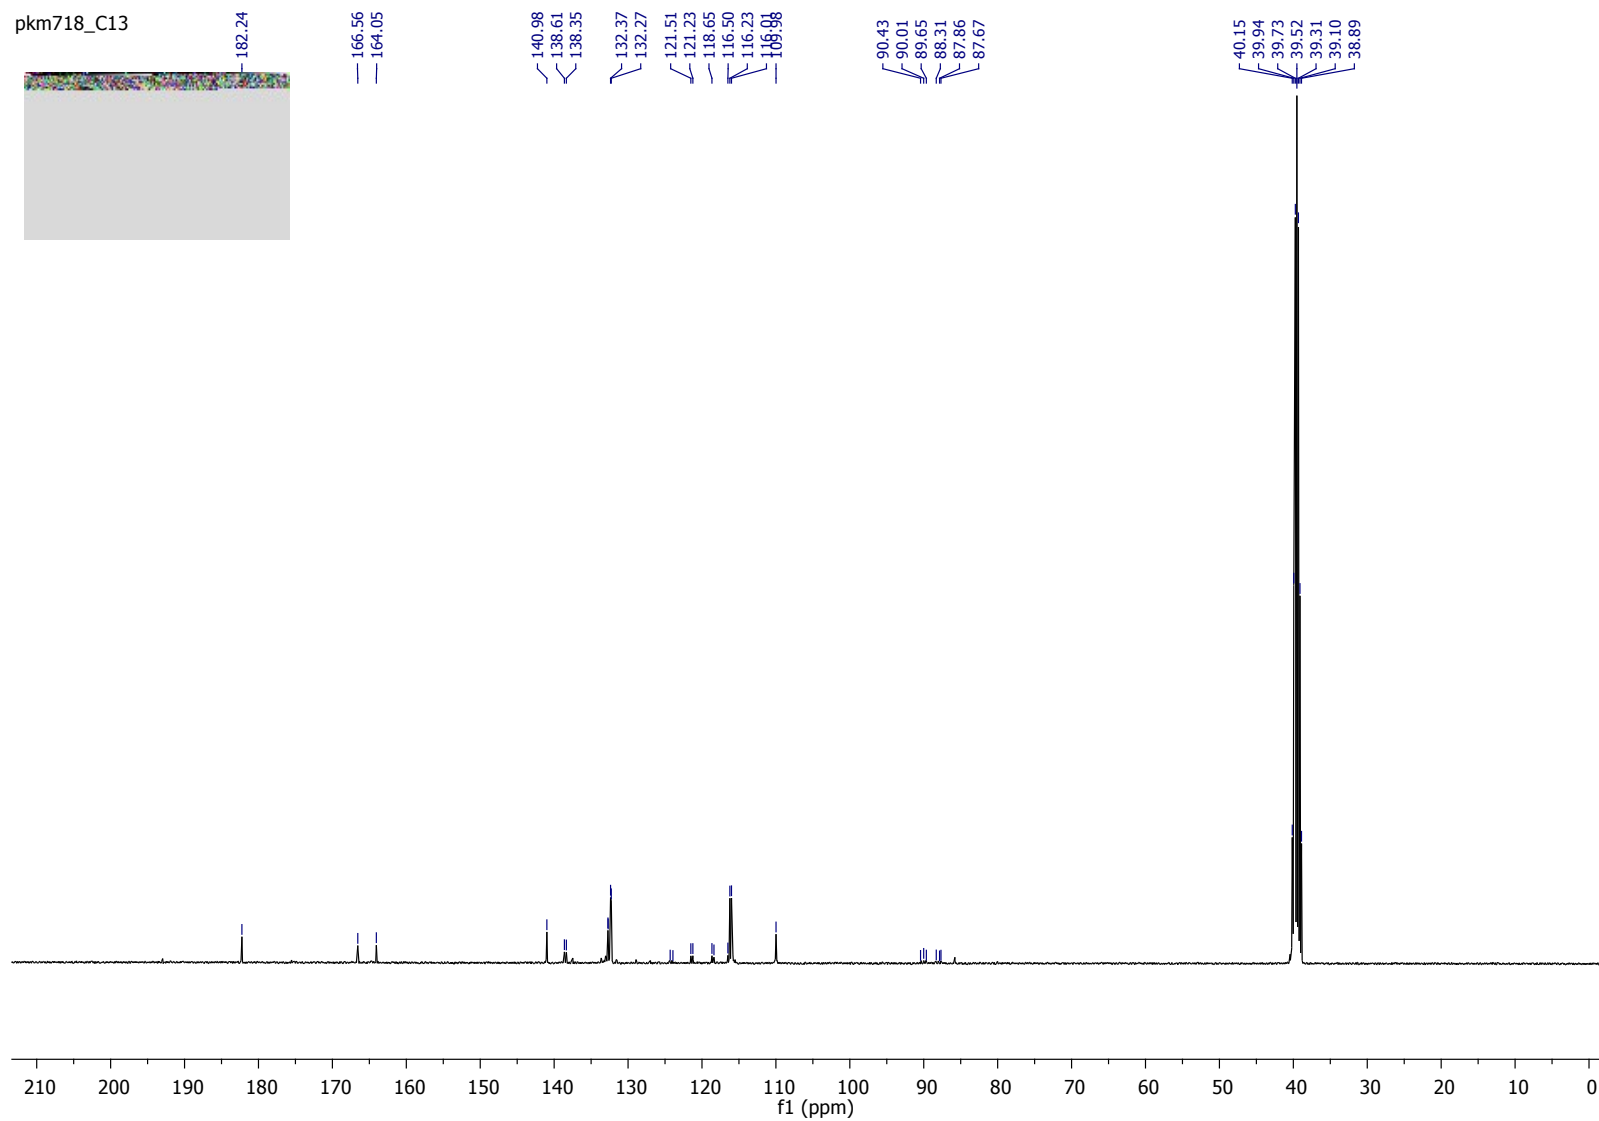

# Compound 25a

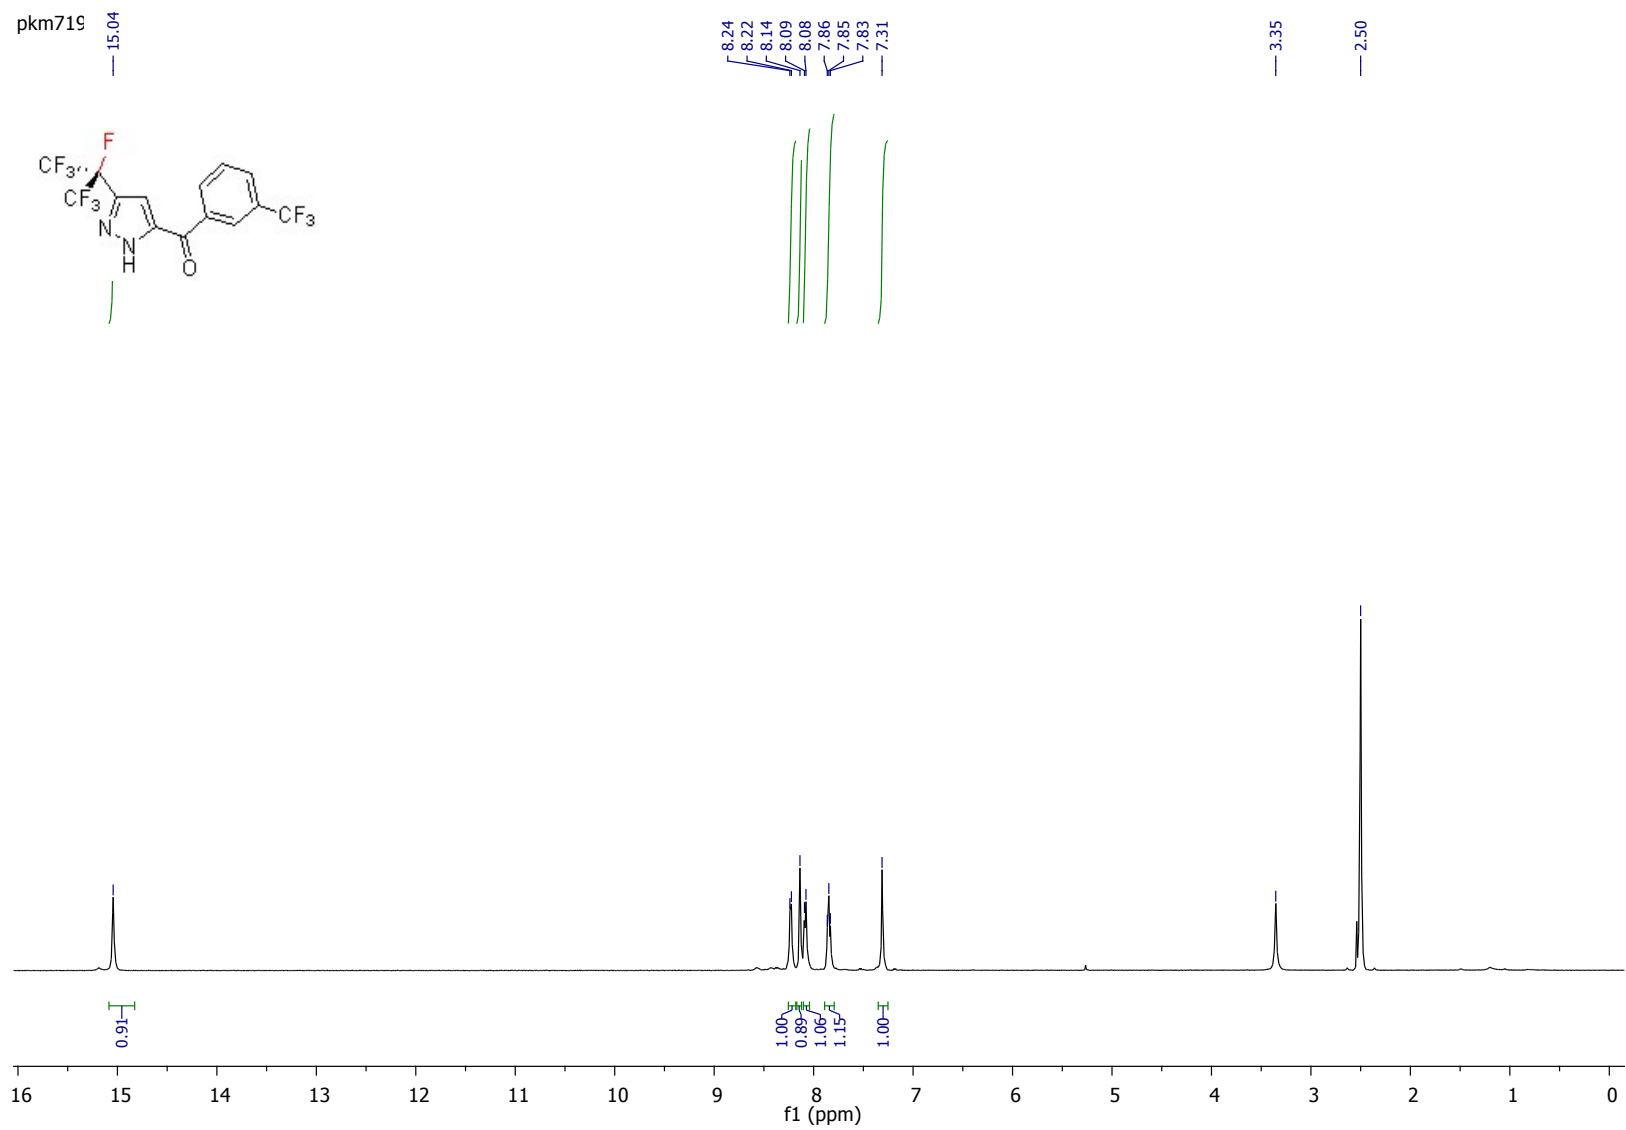

# Compound 25a

pkm719\_F19

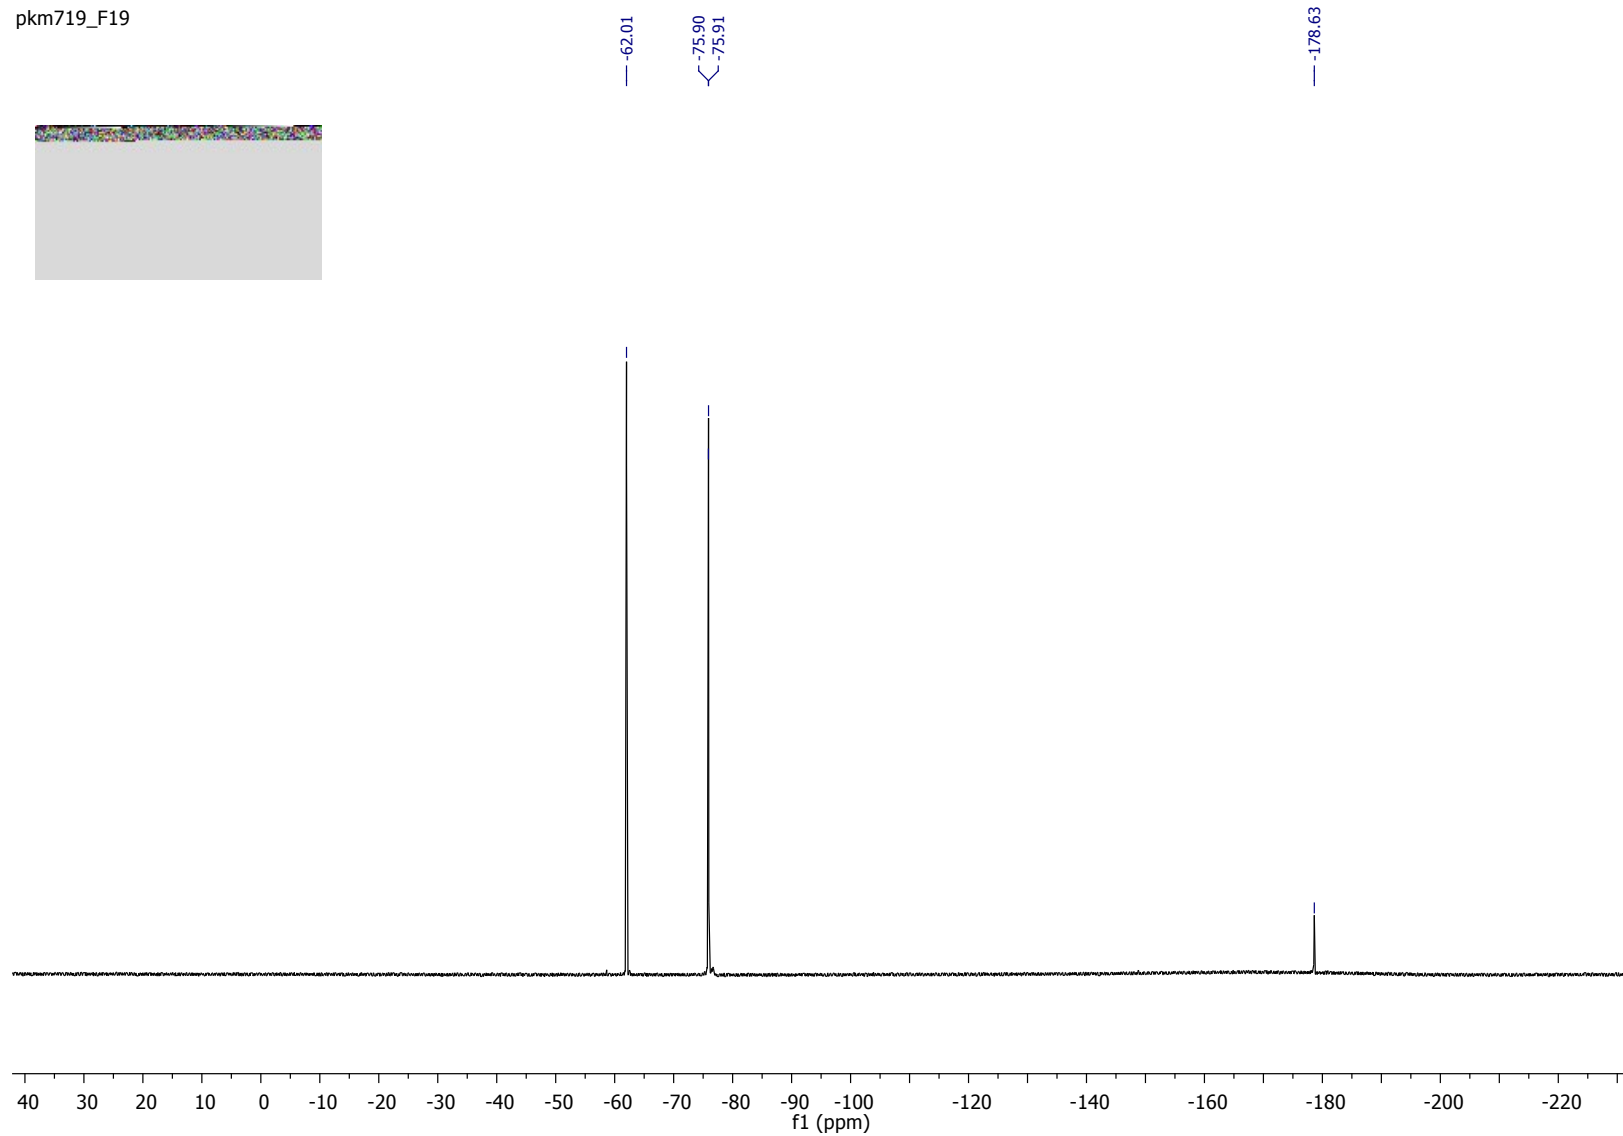

# Compound 25a

pkm719\_C13

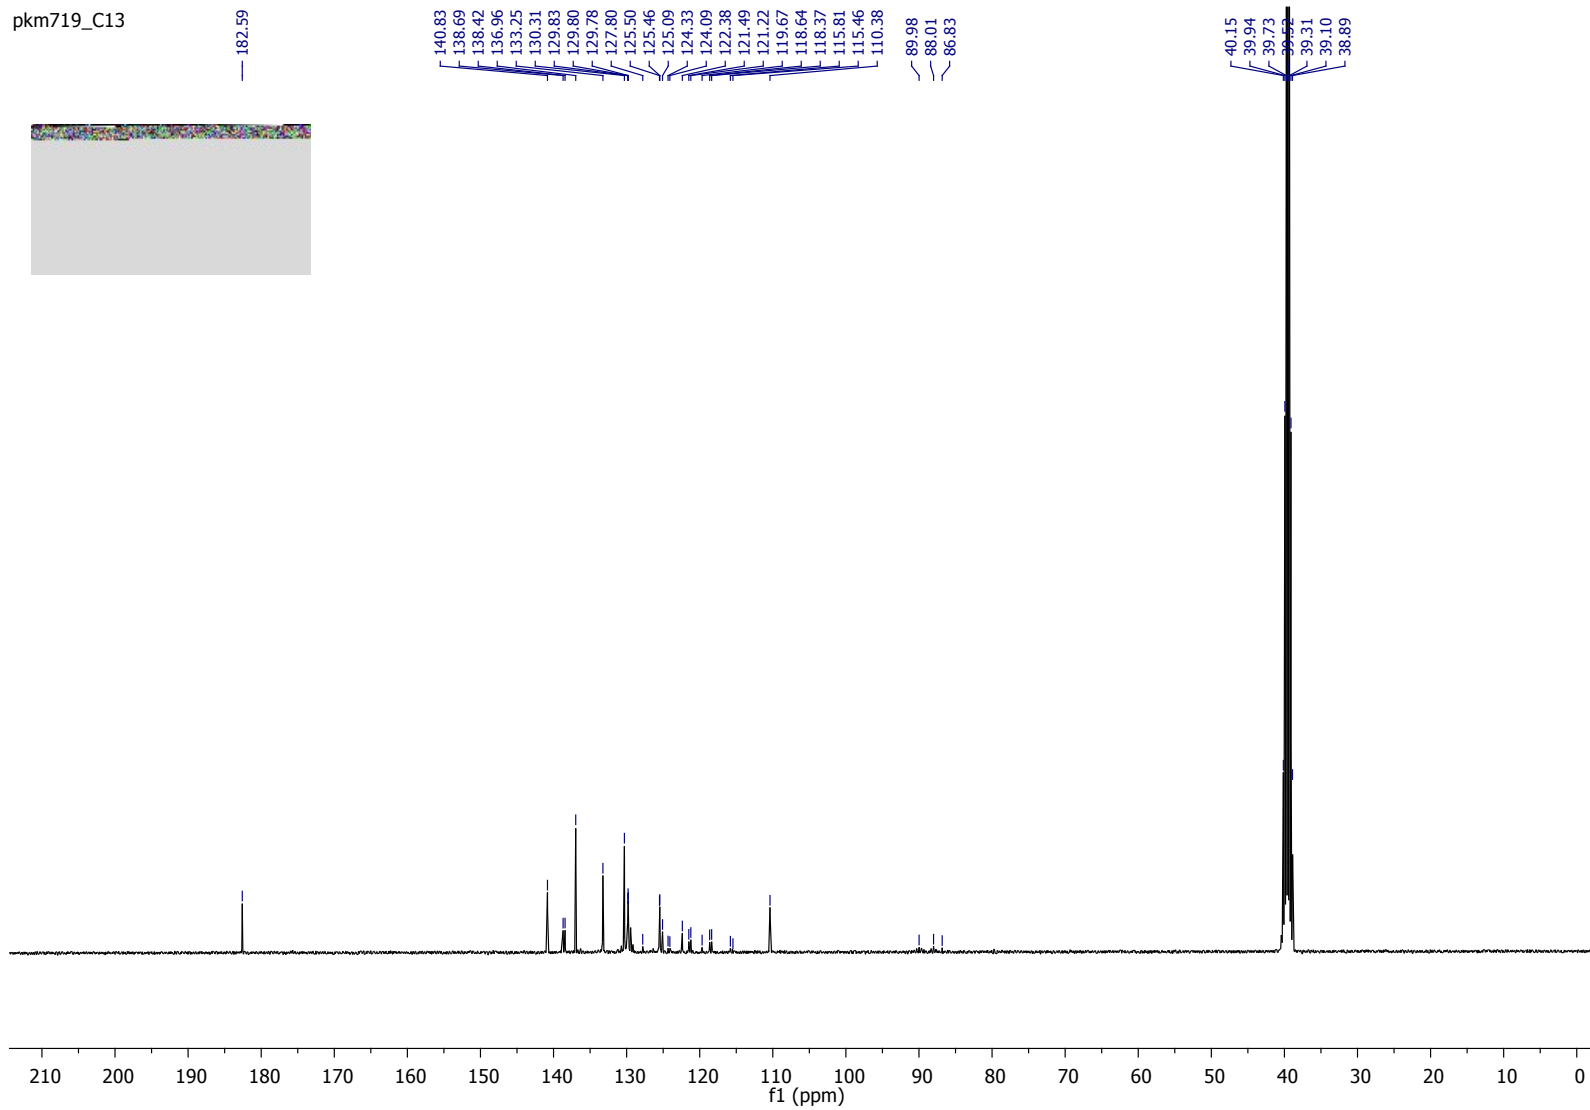

# Compound 26a

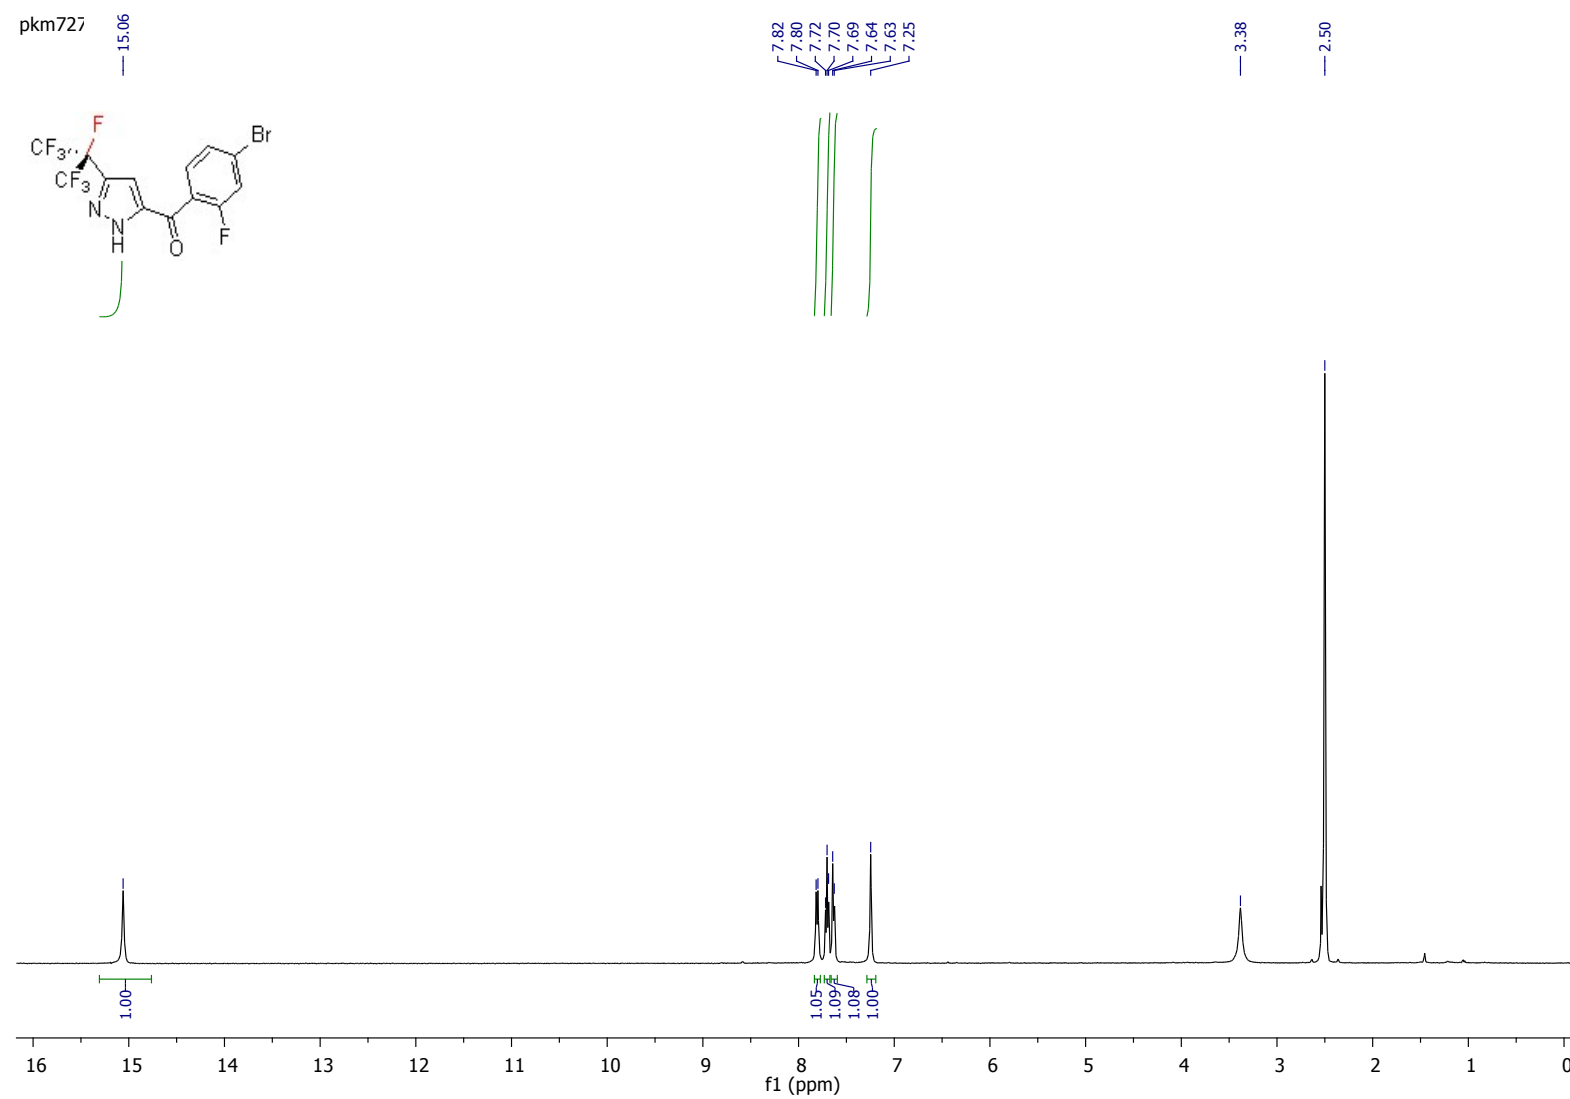



# Compound 26a

pkm727\_F19

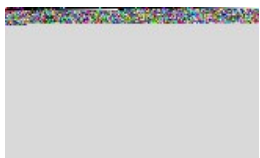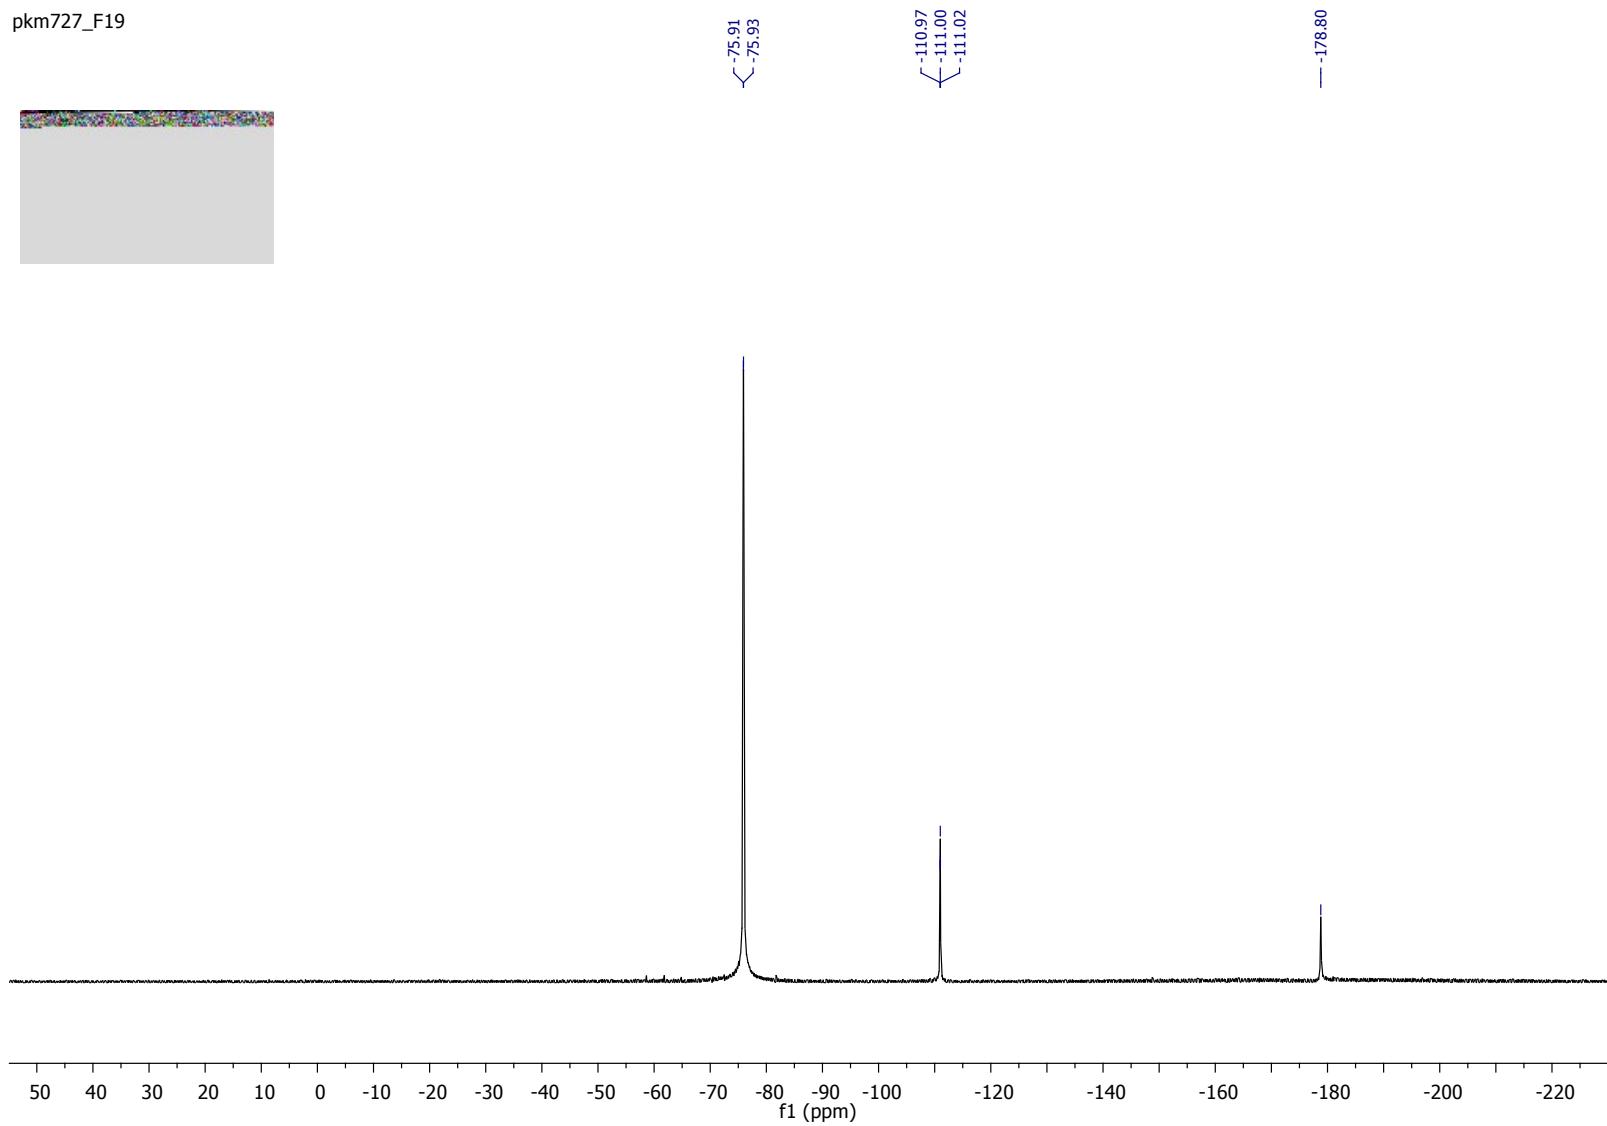

# Compound 26a

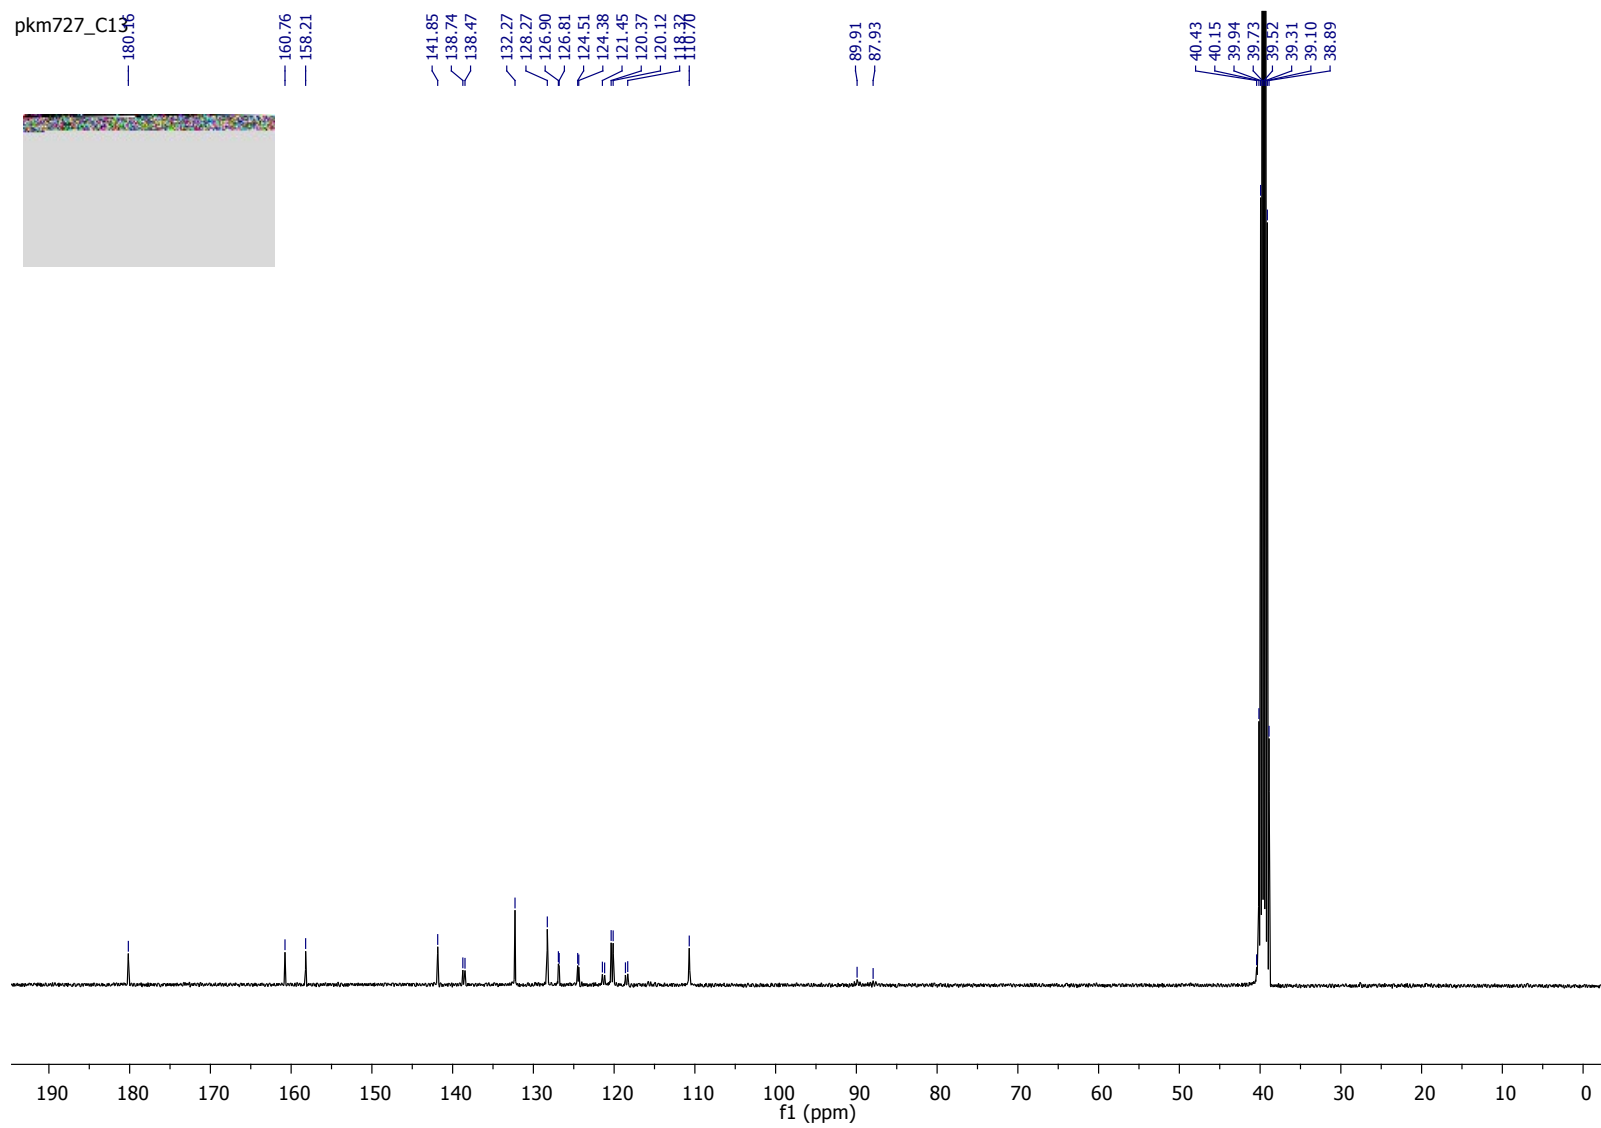

Compound 30a

PPM

pkm728

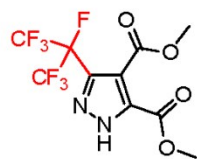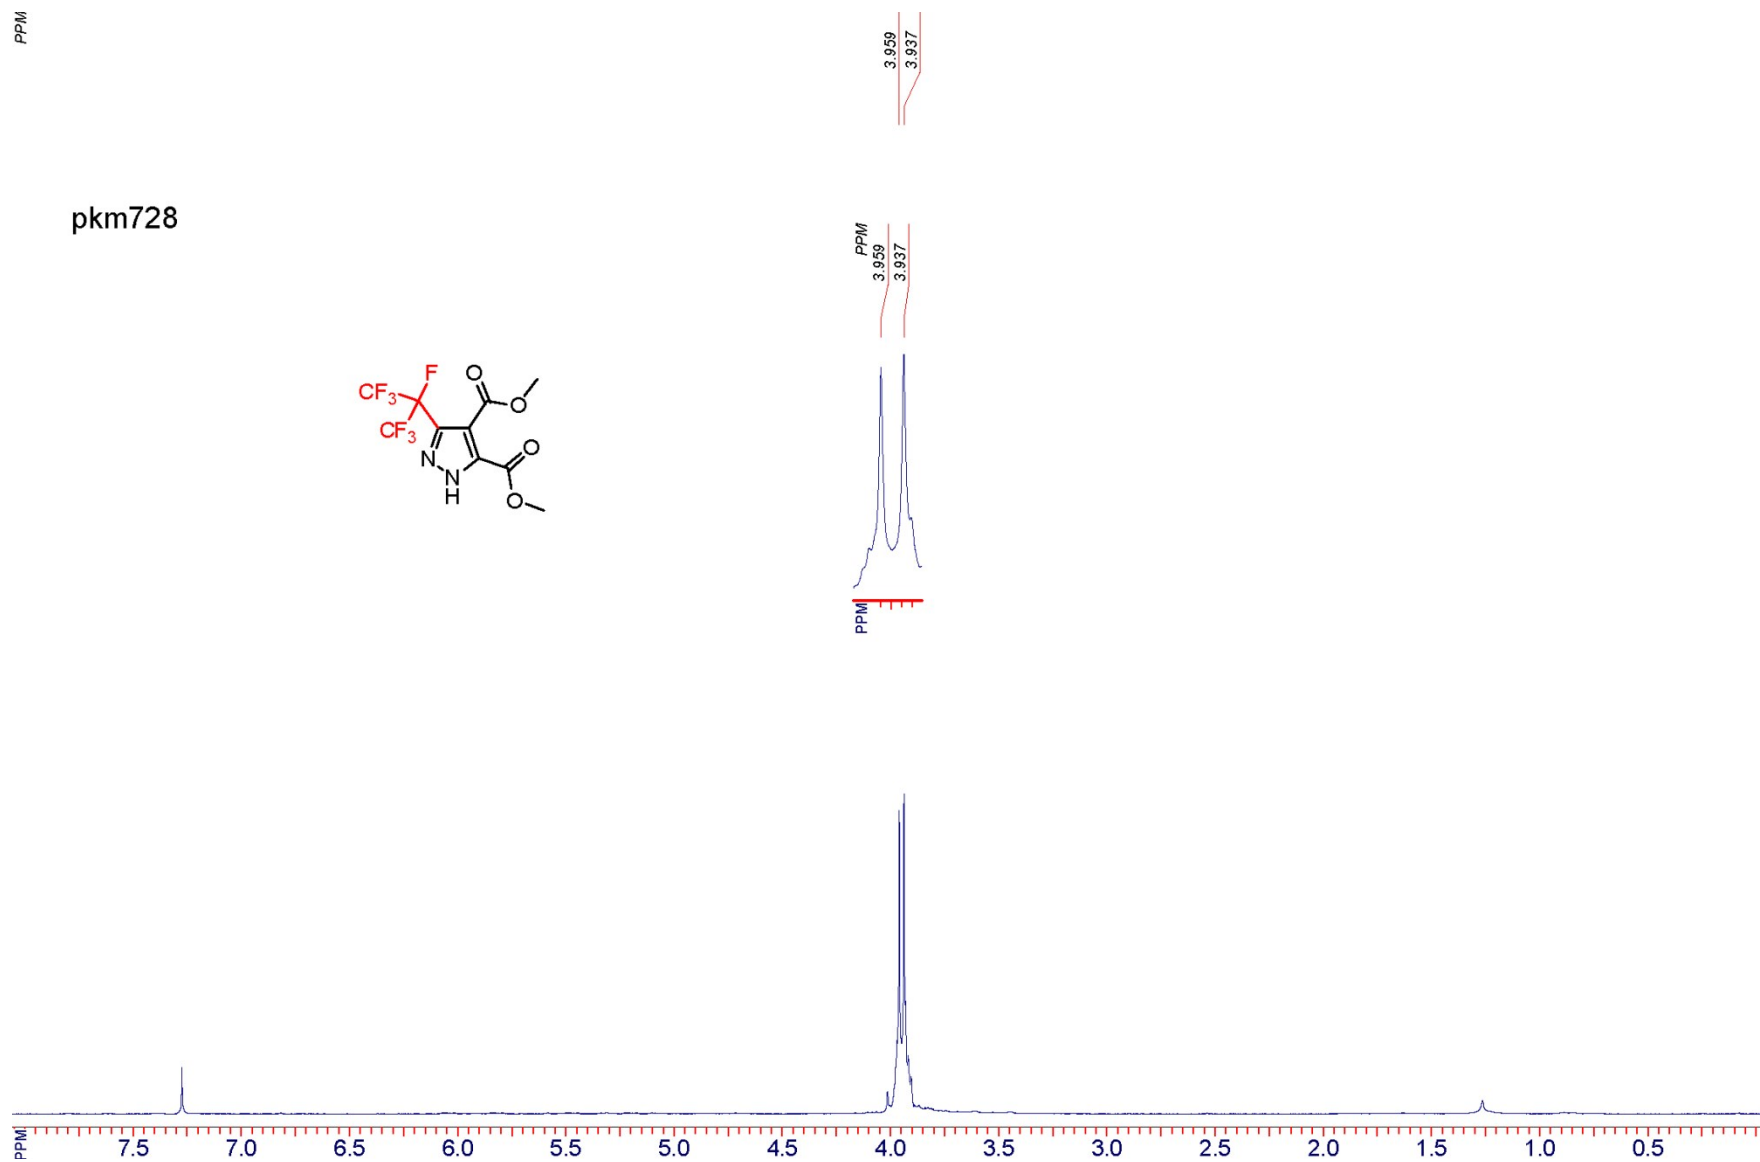

# Compound 30a

PKM734\_F19  
19F

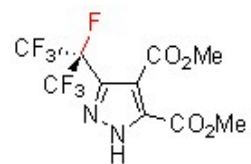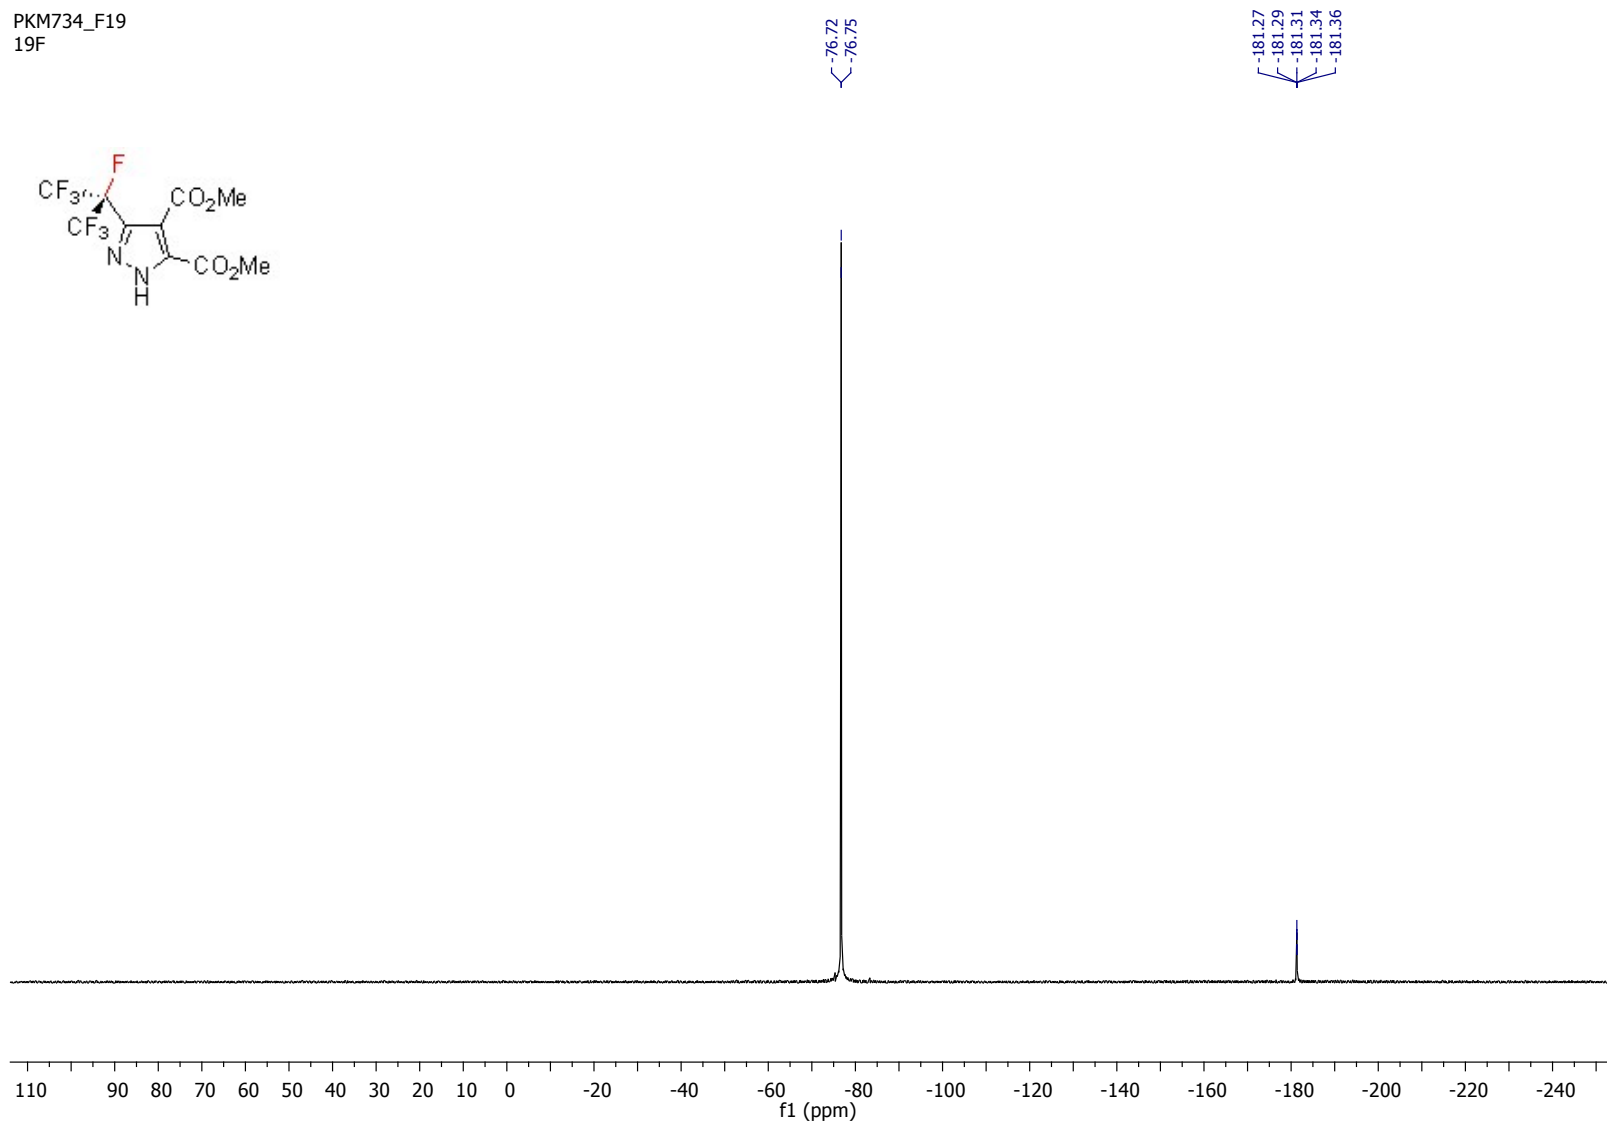

# Compound 30a

PKM734\_C13

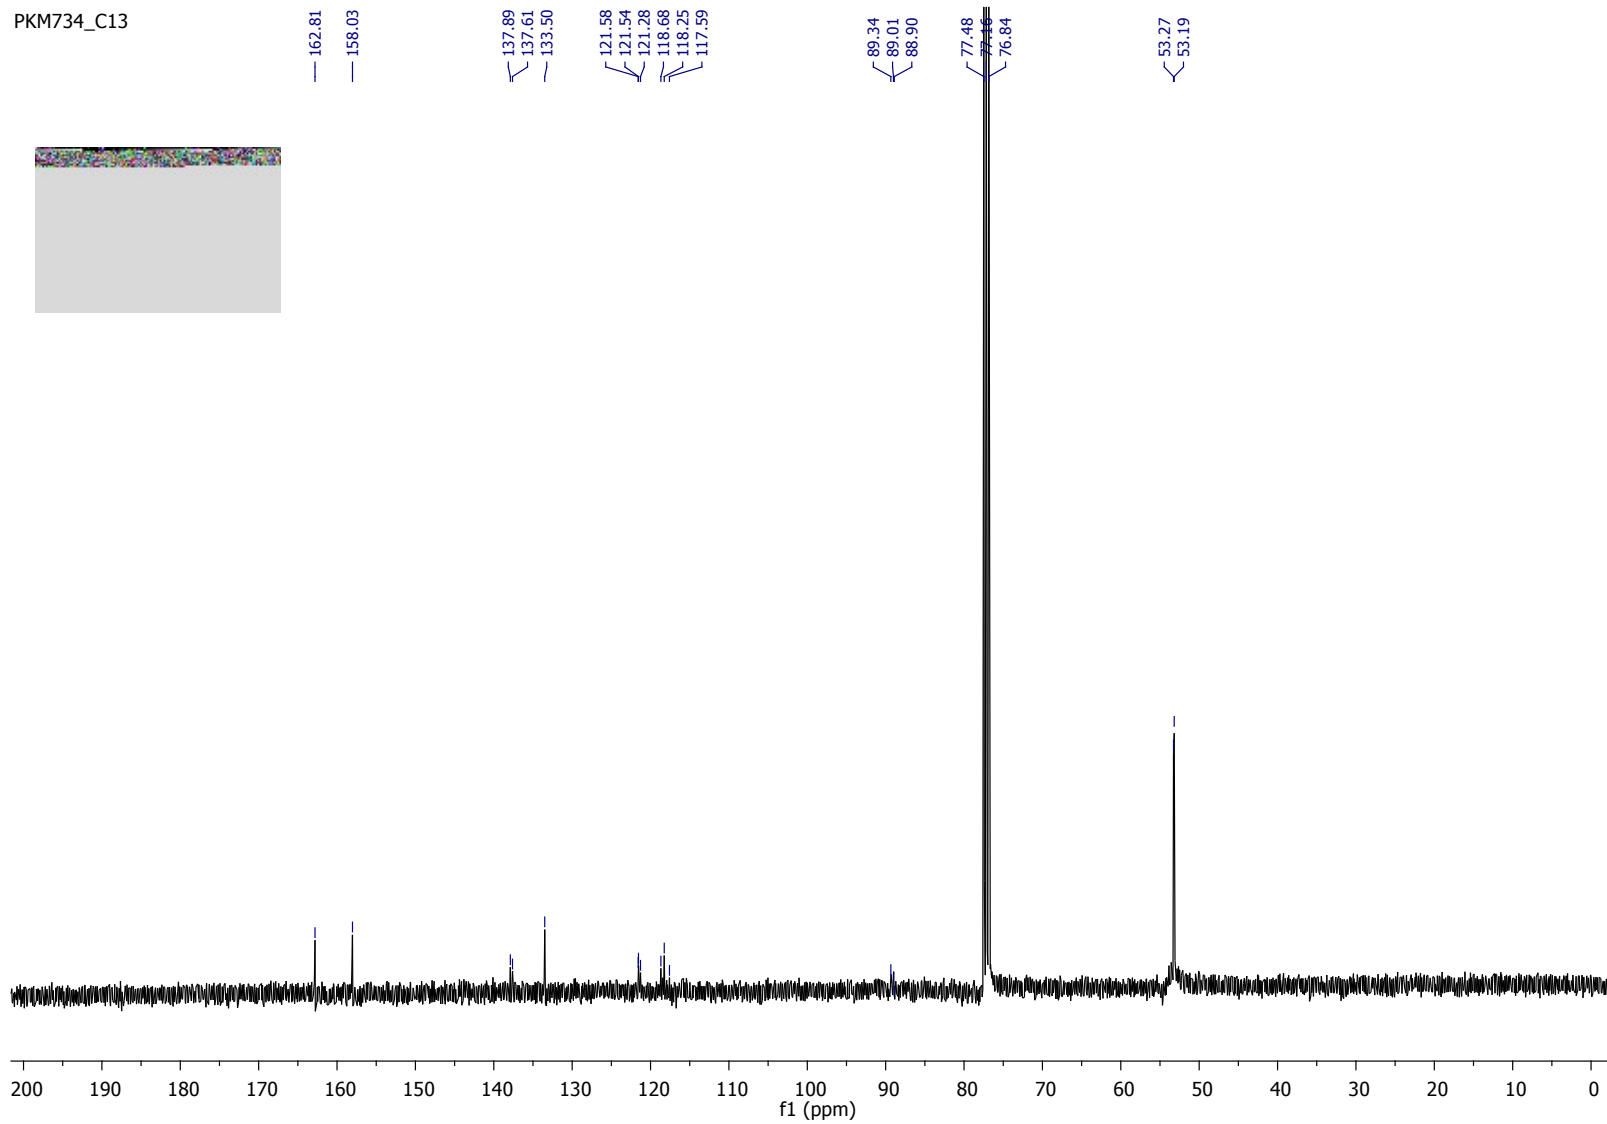

# Compound 31a

PPM

4.431  
4.416  
4.407  
4.393

1.386  
1.376

pkm729

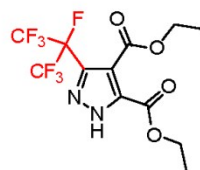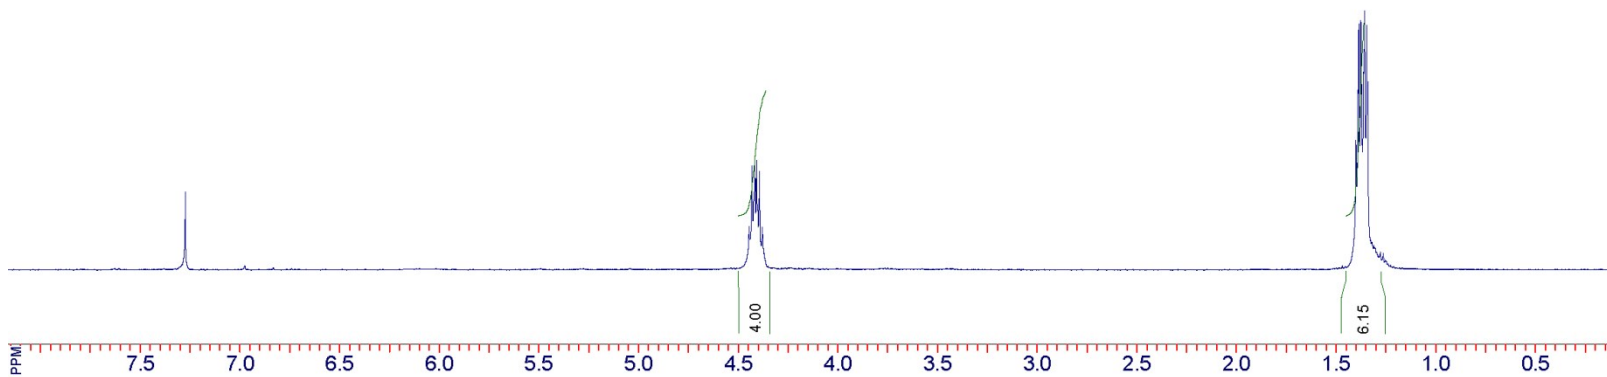

|                   |                |                  |           |                            |           |
|-------------------|----------------|------------------|-----------|----------------------------|-----------|
| File name: pkm729 | Operator: root | SF: 499.9500 MHz | NSC: 1    | PW: 0.00 usec, RG: 32      | SI: 32768 |
| Date: 30-Jan-2017 | Solvent: CDCl3 | SW: 8993 Hz      | TE: 683 K | AQ: 1.82 sec, RD: 0.00 sec |           |

# Compound 31a

PKM735\_F19  
19F

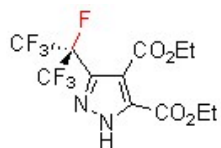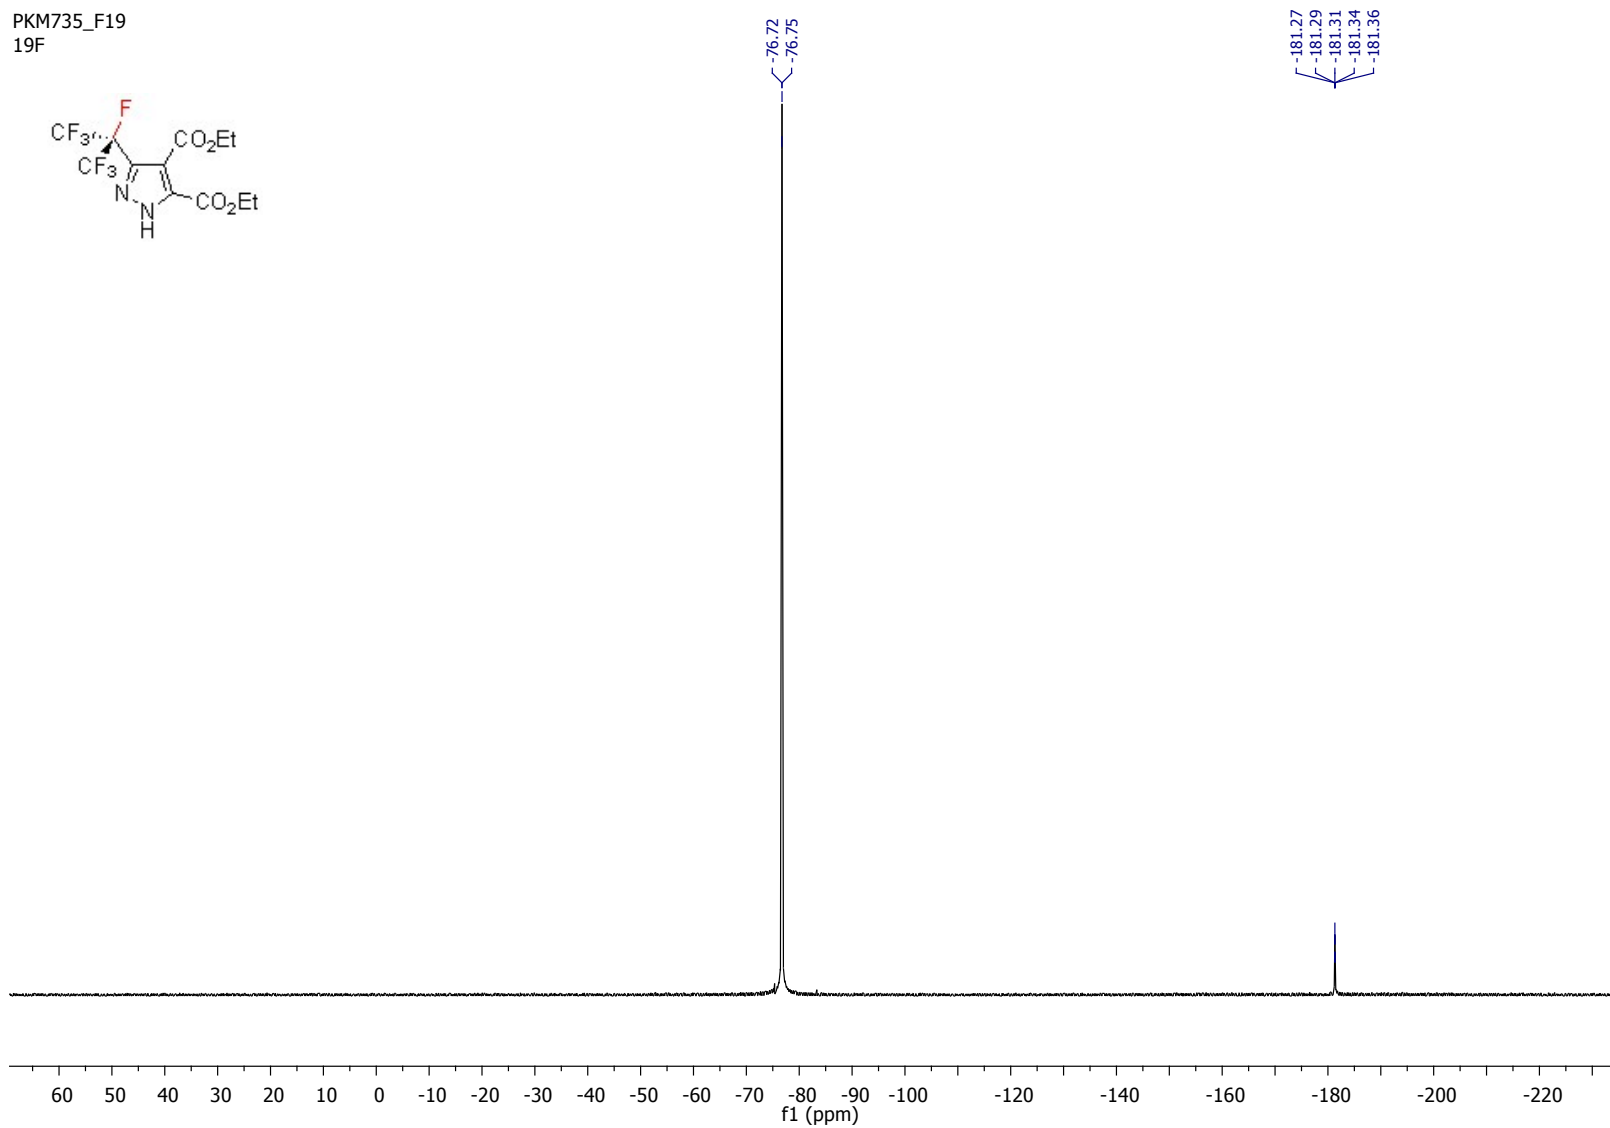

# Compound 31a

pkm735\_C13

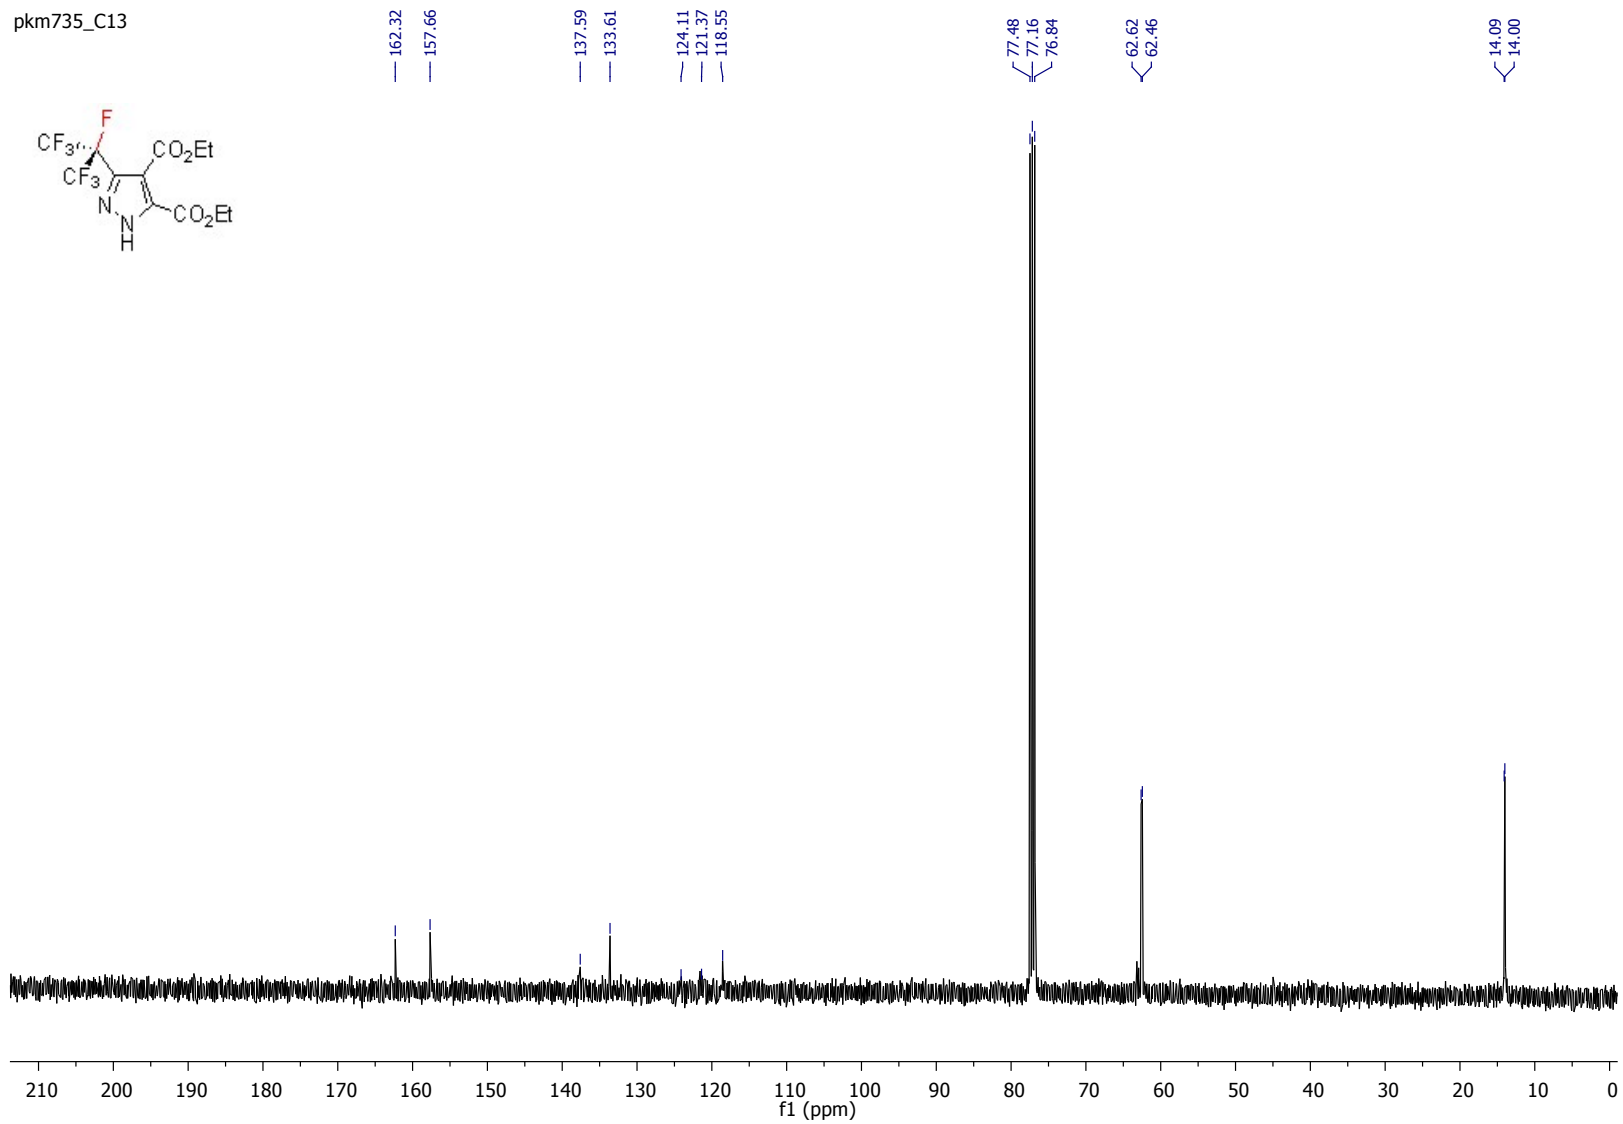



# Crude product 35a

pkm714

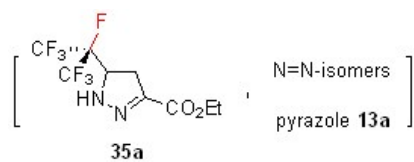

crude

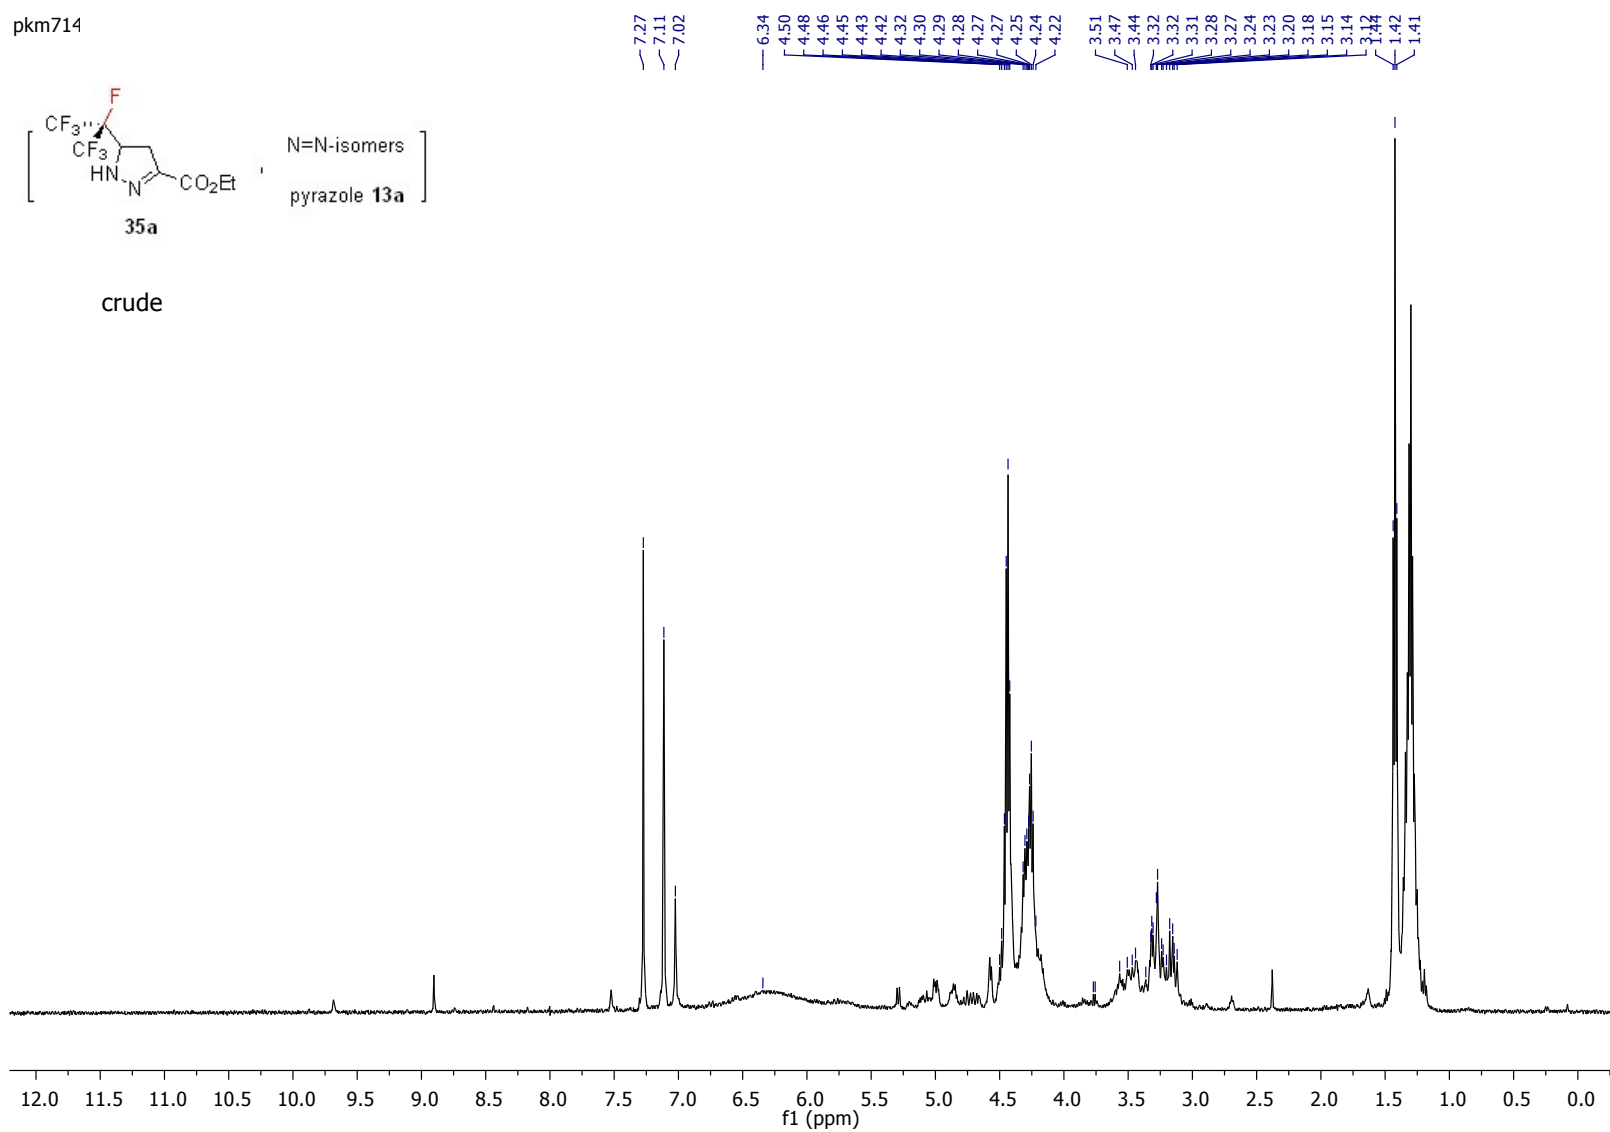

Supplement: c7ob01579h1.pdf [file c7ob01579h1.pdf]
